# Supplementary material for: Imaging Mass Spectrometry and Lectin Analysis of N-Linked Glycans in Carbohydrate Antigen–Defined Pancreatic Cancer Tissues
Source: PubMed Central journal article supplement (PMC8724603; doi:10.1074/mcp.ra120.002256), 2020-12-08
Supplement: mmc1.pdf [file mmc1.pdf]

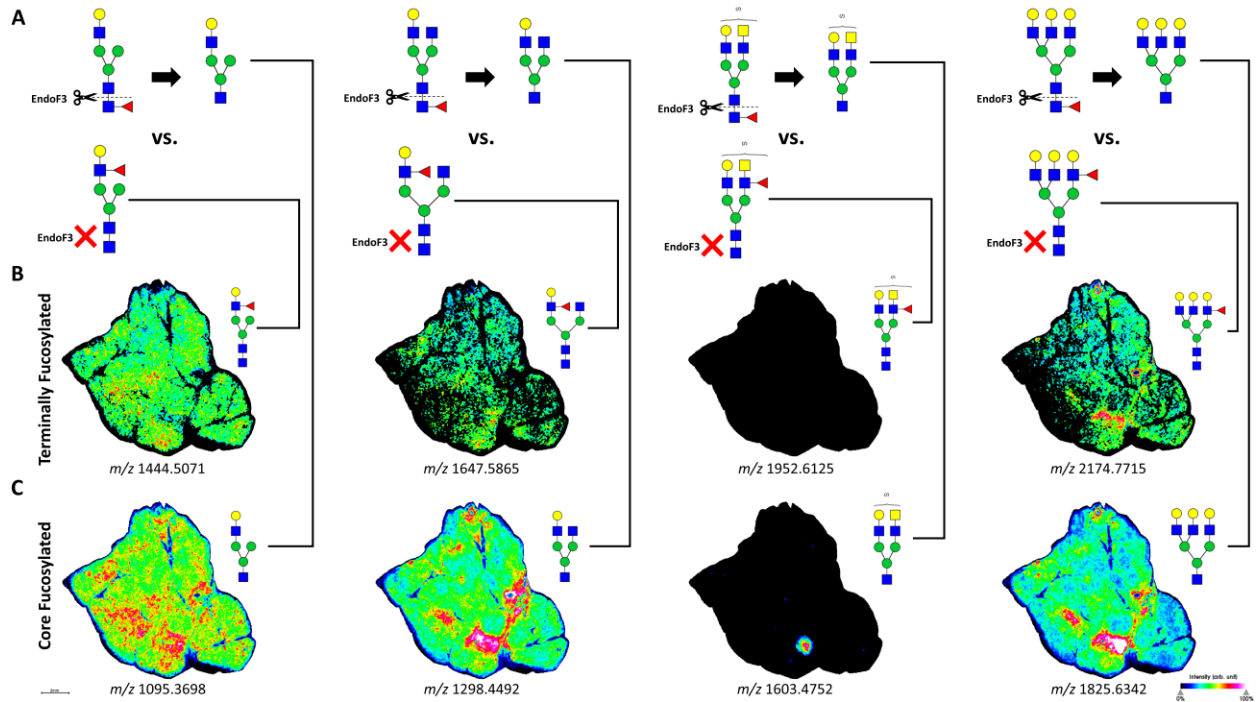

**Figure S1. Endoglycosidase F3 reveals core fucosylated N-glycans.** A) Endo F3 cleaves N-glycans between GlcNAc residues on the chitobiose core only in the presence of a core fucose residue and is unable to cleave terminally fucosylated isomers. B) Terminally fucosylated isomers were detected minimally (Hex4dHex1HexNAc3  $m/z$  1444.5071, Hex4dHex1HexNAc4  $m/z$  1647.5865, Hex6dHex1HexNAc5  $m/z$  2174.7715) or not at all (Hex4dHex1HexNAc5SO<sub>4</sub>1  $m/z$  1952.6125). C) Endo F3 cleavage products from core fucosylated isomers with a distinct -349.1373 mass shift were observed in much greater abundance for the four representative structures shown (Hex4HexNAc2  $m/z$  1095.3698, Hex4HexNAc3  $m/z$  1298.4492, Hex4HexNAc4SO<sub>4</sub>1  $m/z$  1603.4752, Hex6HexNAc4  $m/z$  1825.6342) as well as for most structures with at least one fucose residue in this report.

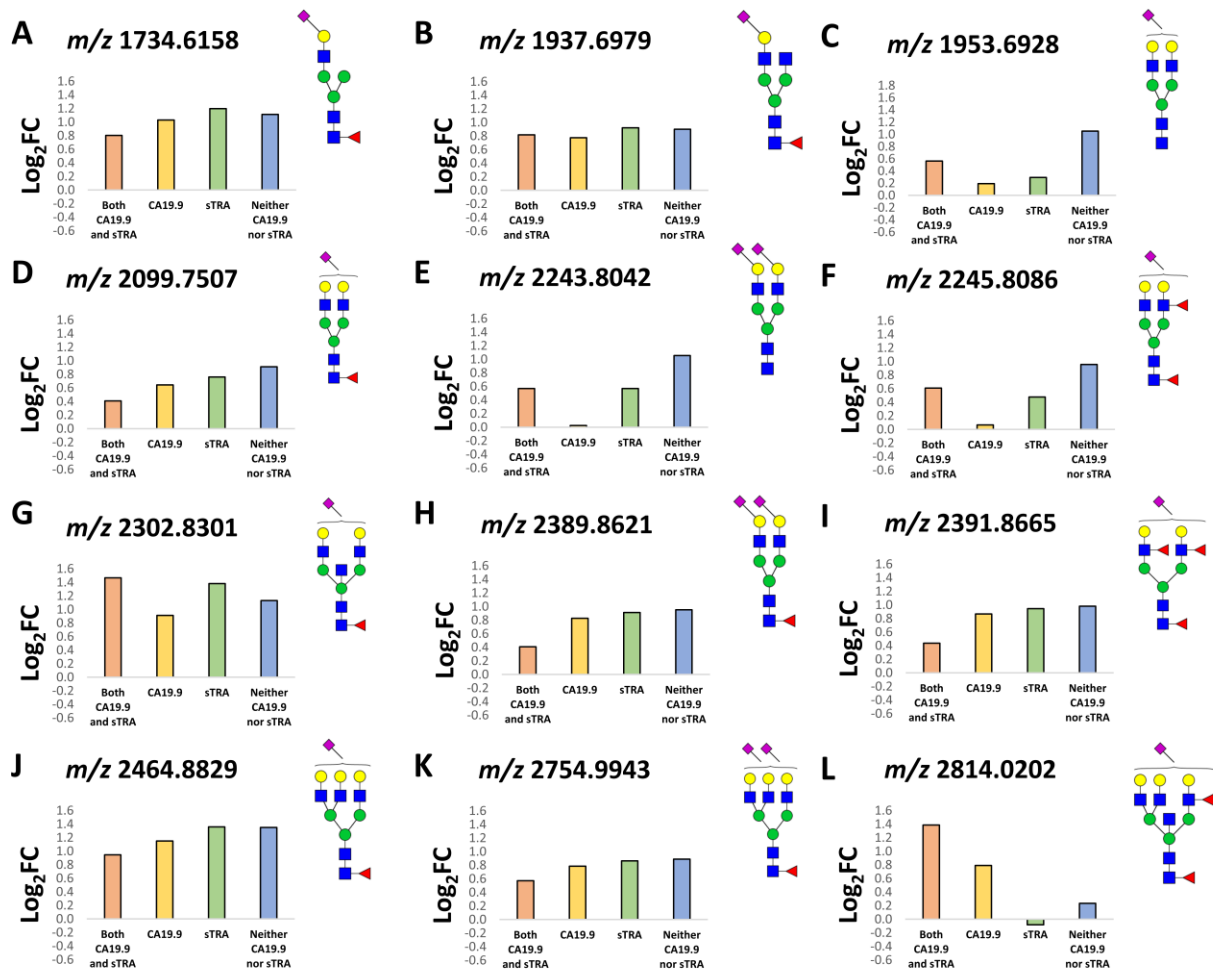

**Figure S2. Sialic Acid Stabilization of TMA cores.** A-L) Representative  $\alpha$ 2,3-sialylated N-glycan structures enriched in tumor tissue cores as compared to patient matched normal tissue cores. Log<sub>2</sub> FC between patient matched tumor and normal cores, where positive values represent enrichment in tumor tissue.

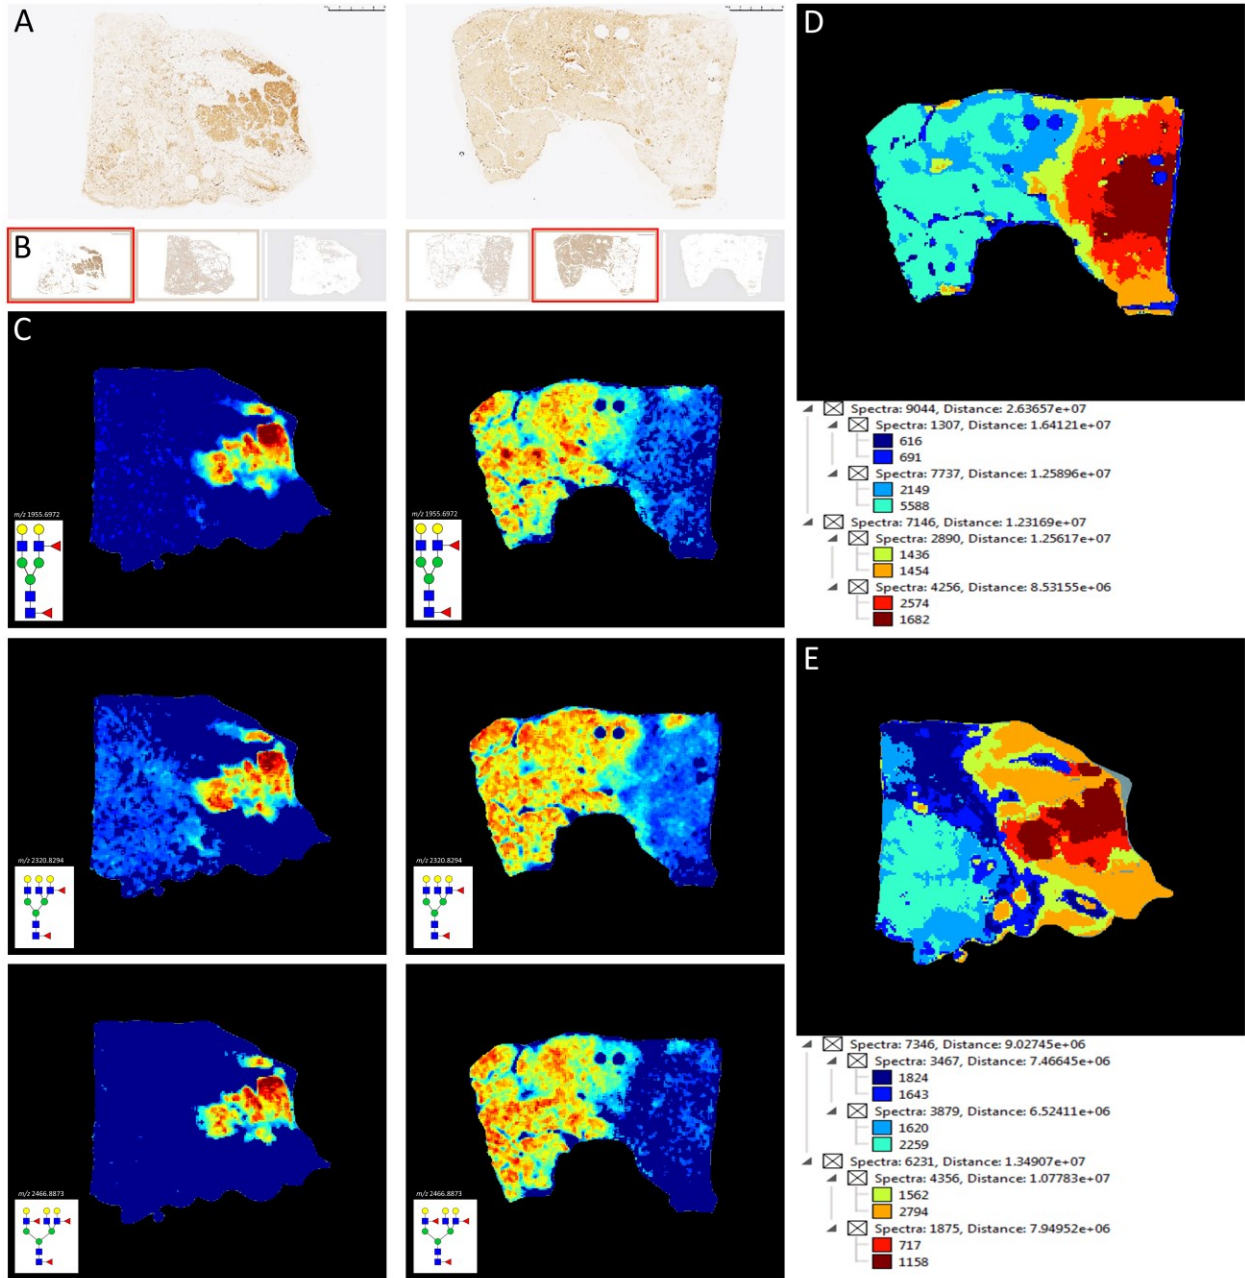

**Figure S3. N-glycan colocalization with CA19-9.** A) Representative whole tissue block sections from which TMA cores were derived were IHC stained for CA19-9 expression. B) A color-based k-means clustering algorithm was applied to high-resolution staining images to generate unbiased staining classifications, the most intense of which (outlined in red) were co-registered with original scans in Fleximaging and used to draw regions of interest around stained tissue. C) SCiLS lab software was used to identify and create images of N-glycans colocalized to areas of CA19-9 staining. Shown are

three representative N-glycans (Hex5dHex2HexNAc4 *m/z* 1955.6975, Hex6dHex2HexNAc5 *m/z* 2320.8294, Hex6dHex3HexNAc5 *m/z* 2466.8873). D, E) Segmentation analysis across eight nodes of 72 N-glycan structures showing differential associations of glycans between CA19-9-staining and non-CA19-9-staining tissue.

| TB#  | Race  | Sex | Age | Vital Status | Recurrence | Type of Recurrence                | Days between Surgery and Recurrence | Days between Surgery and Date of last contact/Death | Histological Type       | Histological Grade        | Staging |
|------|-------|-----|-----|--------------|------------|-----------------------------------|-------------------------------------|-----------------------------------------------------|-------------------------|---------------------------|---------|
| 2204 | WHITE | M   | 75  | Unknown      | Unknown    | N/A                               | N/A                                 | 272                                                 | Adenocarcinoma          | moderately differentiated | T3N0MX  |
| 2278 | WHITE | M   | 76  | Unknown      | Unknown    | N/A                               | N/A                                 | 211                                                 | cholangiocarcinoma      | moderately differentiated | T3N1MX  |
| 2279 | WHITE | F   | 61  | Unknown      | YES        | distant recurrence - GAST         | 2233                                | 2486                                                | Adenocarcinoma          | well differentiated       | T3N0MX  |
| 2381 | WHITE | M   | 73  | Unknown      | YES        | Distant recurrence - CNS          | 2499                                | 2587                                                | Mucinous Adenocarcinoma | Not Reported              |         |
| 2417 | WHITE | M   | 80  | Unknown      | Unknown    | N/A                               | N/A                                 | 23                                                  | Adenocarcinoma          | poorly differentiated     | T3N1MX  |
| 2454 | WHITE | F   | 69  | Unknown      | Unknown    | N/A                               | N/A                                 | Unknown                                             | Adenocarcinoma          | moderately differentiated | T3N0MX  |
| 2487 | BLACK | M   | 73  | Unknown      | Unknown    | N/A                               | N/A                                 | 106                                                 | Adenocarcinoma          | well differentiated       | T3N1MX  |
| 2464 | BLACK | F   | 61  | Unknown      | YES        | metastacized to liver and omentum | N/A                                 | Unknown                                             | Adenocarcinoma          | poorly differentiated     | T4N1Mx  |
| 1751 | WHITE | M   | 65  | Unknown      | Unknown    | N/A                               | N/A                                 | 101                                                 | Adenocarcinoma          | well differentiated       | T3N1MX  |
| 1800 | BLACK | F   | 67  | Unknown      | Unknown    | N/A                               | N/A                                 | 204                                                 | Adenocarcinoma          | poorly differentiated     | T3N1MX  |
| 1691 | WHITE | M   | 69  | Unknown      | Unknown    | N/A                               | N/A                                 | 92                                                  | Adenocarcinoma          | Not Reported              | T3N1MX  |
| 1848 | WHITE | M   | 71  | Unknown      | NO         | Never disease free                | N/A                                 | 314                                                 | Adenocarcinoma          | poorly differentiated     | T3N1MX  |
| 1911 | WHITE | M   | 83  | Unknown      | NO         | Disease free                      | N/A                                 | 118                                                 | Adenocarcinoma          | moderately differentiated | T3N1MX  |
| 1747 | WHITE | F   | 63  | Unknown      | NO         | Possible recurrence               | N/A                                 | 138                                                 | Adenocarcinoma          | poorly differentiated     | T3N1MX  |
| 1673 | WHITE | M   | 78  | Unknown      | NO         | Disease free                      | N/A                                 | 440                                                 | Adenocarcinoma          | moderately differentiated | T3N1    |
| 1685 | BLACK | M   | 66  | Unknown      | NO         | Never disease free                | N/A                                 | 173                                                 | Adenocarcinoma          | poorly differentiated     | T3N1MX  |
| 1987 | WHITE | F   | 58  | Unknown      | NO         | Disease free                      | N/A                                 | 404                                                 | Adenocarcinoma          | moderately differentiated | T3N1MX  |
| 2055 | WHITE | M   | 69  | Unknown      | Unknown    | N/A                               | N/A                                 | 808                                                 | Adenocarcinoma          | poorly differentiated     | T3NXMX  |
| 1955 | BLACK | F   | 51  | Unknown      | Unknown    | N/A                               | N/A                                 | 392                                                 | Adenocarcinoma          | moderately differentiated | T3N1MX  |
| 1958 | WHITE | M   | 42  | Unknown      | Unknown    | N/A                               | N/A                                 | 429                                                 | Adenocarcinoma          | poorly differentiated     | T3N1MX  |
| 1982 | WHITE | F   | 66  | Unknown      | Unknown    | N/A                               | N/A                                 | 336                                                 | Adenocarcinoma          | moderately differentiated | T2N1MX  |
| 2572 | WHITE | F   | 87  | Unknown      | NO         | Disease free                      | N/A                                 | 1387                                                | Adenocarcinoma          | moderately differentiated | T1N0MX  |
| 2091 | WHITE | F   | 54  | Unknown      | YES        | Local Recurrence                  | 406                                 | 547                                                 | Adenocarcinoma          | Not Reported              | T2N0MX  |
| 2495 | WHITE | M   | 56  | Dead         | NO         | Never disease free                | N/A                                 | 76                                                  | Adenocarcinoma          | Not Reported              | T3N1MX  |
| 2807 | BLACK | F   | 62  | Unknown      | NO         | Never disease free                | N/A                                 | 126                                                 | Adenocarcinoma          | poorly differentiated     | T3N0MX  |
| 2815 | WHITE | F   | 76  | Unknown      | Unknown    | N/A                               | N/A                                 | Unknown                                             | Ductal adenocarcinoma   | moderately differentiated | T3N0MX  |
| 2893 | BLACK | F   | 68  | Unknown      | YES        | Local recurrence                  | 613                                 | 613                                                 | Adenocarcinoma          | moderately differentiated | T3N1MX  |
| 2916 | WHITE | F   | 37  | Unknown      | YES        | Distant recurrence                | 165                                 | 236                                                 | Adenocarcinoma          | moderately differentiated | T3N1MX  |
| 2790 | WHITE | M   | 78  | Unknown      | NO         | Never disease free                | N/A                                 | 32                                                  | Adenocarcinoma          | moderately differentiated | T2N1bMX |
| 2695 | WHITE | M   | 70  | Unknown      | NO         | Never disease free                | N/A                                 | 185                                                 | Adenocarcinoma          | Not Reported              | T2N0MX  |
| 3721 | WHITE | F   | 66  | Unknown      | NO         | Never disease free                | N/A                                 | 50                                                  | Ductal adenocarcinoma   | poorly differentiated     | T3N0MX  |
| 3627 | BLACK | F   | 84  | Unknown      | Unknown    | N/A                               | N/A                                 | Unknown                                             | Adenocarcinoma          | moderately differentiated | T2N1MX  |
| 3508 | WHITE | M   | 49  | Unknown      | NO         | Never disease free                | N/A                                 | 221                                                 | Adenocarcinoma          | moderately differentiated | T3N1MX  |
| 3727 | WHITE | M   | 74  | Unknown      | YES        | Distant recurrence                | 140                                 | 140                                                 | Adenosquamous carcinoma | moderately differentiated | T3N0MX  |
| 3499 | WHITE | F   | 66  | Unknown      | NO         | Disease free                      | N/A                                 | 125                                                 | Ductal adenocarcinoma   | Not Reported              | T1N0MX  |
| 3463 | WHITE | F   | 64  | Unknown      | NO         | Disease free                      | N/A                                 | 215                                                 | Ductal adenocarcinoma   | moderately differentiated | T3N1MX  |
| 3832 | WHITE | M   | 68  | Unknown      | YES        | Distant recurrence - LUNG         | 332                                 | 353                                                 | Adenocarcinoma          | moderately differentiated | T3N1MX  |
| 3978 | WHITE | M   | 63  | Unknown      | NO         | Disease free                      | N/A                                 | 25                                                  | Adenocarcinoma          | Not Reported              | T2N1bMX |
| 3922 | BLACK | M   | 72  | Unknown      | NO         | Disease free                      | N/A                                 | 94                                                  | Ductal adenocarcinoma   | moderately differentiated | T1N0MX  |
| 3986 | WHITE | F   | 70  | Unknown      | NO         | Disease free                      | N/A                                 | 27                                                  | Adenocarcinoma          | poorly differentiated     | T3N1MX  |
| 3406 | WHITE | F   | 74  | Unknown      | NO         | Disease free                      | N/A                                 | 62                                                  | Ductal adenocarcinoma   | moderately differentiated | T3N1MX  |
| 4038 | WHITE | M   | 71  | Unknown      | YES        | Distant recurrence - LUNG         | 525                                 | 318                                                 | Adenocarcinoma          | moderately differentiated | T3N1MX  |
| 3859 | WHITE | F   | 50  | Dead         | YES        | Distant recurrence - HEPT         | 196                                 | 202                                                 | Ductal adenocarcinoma   | moderately differentiated | T3N1MX  |
| 3915 | WHITE | F   | 53  | Dead         | YES        | Distant recurrence - LUNG         | 1182                                | 1213                                                | Ductal adenocarcinoma   | moderately differentiated | T2N0MX  |
| 3891 | WHITE | F   | 62  | Unknown      | Unknown    | N/A                               | N/A                                 | 1148                                                | Ductal adenocarcinoma   | moderately differentiated | T3N1bM  |
| 3886 | WHITE | M   | 62  | Unknown      | YES        | Distant recurrence - HEPT         | 337                                 | 604                                                 | Adenocarcinoma          | moderately differentiated | T3N1bMX |
| 4072 | WHITE | F   | 71  | Unknown      | NO         | Disease Free                      | N/A                                 | 27                                                  | Ductal adenocarcinoma   | moderately differentiated | T3N0MX  |
| 4524 | WHITE | F   | 60  | Unknown      | NO         | Disease Free                      | N/A                                 | 130                                                 | Ductal adenocarcinoma   | moderately differentiated | T3N1MX  |
| 4071 | BLACK | M   | 64  | Unknown      | NO         | Disease Free                      | N/A                                 | 43                                                  | Ductal adenocarcinoma   | moderately differentiated | T1N1bMX |
| 4365 | WHITE | F   | 78  | Unknown      | NO         | Disease Free                      | N/A                                 | 90                                                  | Adenocarcinoma          | moderately differentiated | T1N0MX  |
| 4180 | WHITE | M   | 87  | Unknown      | NO         | Disease Free                      | N/A                                 | 69                                                  | Adenocarcinoma          | poorly differentiated     | T3N1bMX |
| 4374 | BLACK | M   | 51  | Unknown      | YES        | Distant recurrence - HEPT         | 735                                 | 736                                                 | Ductal adenocarcinoma   | moderately differentiated | T3N1MX  |
| 4257 | ASIAN | M   | 39  | Dead         | NO         | Never disease free                | N/A                                 | 9                                                   | Ductal adenocarcinoma   | moderately differentiated | T3N1MX  |

**Table S1. Clinical information for patient samples used for TMA cores and for whole tissue analysis.**

Table with 12 columns: Composition, Theoretical Mass, Observed Mass, Mass Error, and then a repeating set of these four columns for 11 other compositions. The data lists various chemical structures (e.g., Hex3Hex1HexNAc2 + Na, Hex5HexNAc5(2,3)NeuAc1 + Na) and their corresponding mass values and errors.

Table S2. Composition and mass accuracy of 151 N-glycan structures obtained via MALDI-IMS analysis. All detected structures are monoisotopic, underivatized and singly-sodiated unless otherwise indicated. Sialic acid derivatization by amidation amidation (AA) reaction yields a mass difference of +290.1114 for 2,3 linked sialic acid residues and +318.1427 for 2,6 linked sialic acid residues. Mass error calculation: ((ABS(Theoretical m/z – Observed m/z)/Theoretical m/z)\*1,000,000).

| m/z        | Structure | m/z        | Structure | m/z        | Structure | m/z        | Structure | m/z        | Structure | m/z       | Structure |
|------------|-----------|------------|-----------|------------|-----------|------------|-----------|------------|-----------|-----------|-----------|
| 1079.3745* |           | 1905.6338  |           | 2215.7980* |           | 2539.9037* |           | 2979.0808* |           | 3485.2587 |           |
| 1136.3964  |           | 1911.5859* |           | 2232.7964  |           | 2581.9336  |           | 2986.1050  |           | 3487.2631 |           |
| 1257.4226  |           | 1912.6662  |           | 2242.6469* |           | 2592.9415  |           | 3017.0996  |           | 3544.2846 |           |
| 1282.4543* |           | 1937.6979  |           | 2243.8042  |           | 2594.9459  |           | 3036.1023* |           | 3556.3210 |           |
| 1298.4492  |           | 1952.6125* |           | 2245.8086  |           | 2596.9252  |           | 3045.1309  |           | 3558.3002 |           |
| 1419.4754  |           | 1953.6928  |           | 2271.8355  |           | 2608.9364  |           | 3047.1101  |           | 3560.2795 |           |
| 1444.5071* |           | 1955.6972* |           | 2286.8352  |           | 2610.9408  |           | 3049.0894  |           | 3588.3108 |           |
| 1460.5020  |           | 1993.6390* |           | 2302.8301  |           | 2613.9486  |           | 3109.1187* |           | 3633.3210 |           |
| 1485.5337* |           | 1994.7193  |           | 2304.8345* |           | 2667.9623  |           | 3120.1265  |           | 3636.3037 |           |
| 1501.5286  |           | 1996.7238* |           | 2318.8250  |           | 2669.9667* |           | 3122.1309  |           | 3674.3476 |           |
| 1542.5552  |           | 2012.7187* |           | 2320.8294* |           | 2685.9616* |           | 3124.1353* |           | 3702.3789 |           |
| 1581.5282  |           | 2022.7506  |           | 2330.8614  |           | 2742.9831* |           | 3130.1585  |           | 3704.3330 |           |
| 1588.5606  |           | 2028.7136  |           | 2346.8563  |           | 2754.9943  |           | 3132.1629  |           | 3709.3452 |           |
| 1606.5599* |           | 2057.6438  |           | 2377.8509* |           | 2756.9987  |           | 3179.1524  |           | 3734.3687 |           |
| 1647.5865* |           | 2058.7242  |           | 2387.8828  |           | 2814.0202  |           | 3198.1551* |           | 3779.3888 |           |
| 1663.5814  |           | 2083.7558  |           | 2389.8621  |           | 2830.0151  |           | 3255.1766* |           | 3836.4004 |           |
| 1688.6131* |           | 2095.5856* |           | 2391.8665  |           | 2832.0195* |           | 3264.1800  |           | 3850.3909 |           |
| 1704.6080  |           | 2099.7507  |           | 2393.8458  |           | 2840.0471  |           | 3266.1844  |           | 3852.3953 |           |
| 1734.6158  |           | 2101.7551* |           | 2417.8934  |           | 2842.0515  |           | 3268.1888  |           | 3855.4031 |           |
| 1743.5810  |           | 2127.7820  |           | 2419.8978  |           | 2858.0464  |           | 3270.1681* |           | 3880.4266 |           |
| 1750.6134  |           | 2139.6969* |           | 2448.8880  |           | 2873.0461* |           | 3323.2059  |           | 3982.4583 |           |
| 1791.6489  |           | 2140.7773  |           | 2464.8829  |           | 2890.0444* |           | 3325.2103  |           |           |           |
| 1809.6393* |           | 2156.7722  |           | 2466.8873* |           | 2899.0729  |           | 3328.2181* |           |           |           |
| 1850.6659* |           | 2158.7766* |           | 2474.9149  |           | 2901.0522  |           | 3332.2790  |           |           |           |
| 1866.6608  |           | 2174.7715* |           | 2507.9139* |           | 2903.0566  |           | 3410.2379  |           |           |           |
| 1891.6925* |           | 2184.8035  |           | 2523.9088* |           | 2906.0393* |           | 3469.2638  |           |           |           |

Galactose (Hex)  
 Mannose (Hex)  
 N-acetylglucosamine (HexNAc)  
 N-acetylgalactosamine (HexNAc)  
 Fucose (dHex)  
 2,3-Sialic Acid (2,3NeuAc)  
 2,6-Sialic Acid (2,6NeuAc)

**Table S3. Summary table of N-glycan structures cumulatively detected across all analyzed tissues.** A key to the monosaccharide unit symbols is provided in the bottom right. N-glycan structures denoted with a \* indicates that the presence of a core fucose residue has been confirmed via analysis

using Endo F3. It is important to note that the representative structures provided do not encompass all possible isomeric conformations for these N-glycans, but are the most likely based on previous reporting, orthogonal analyses and the available biosynthetic pathways.

| Centroid [m/z] | Both CA19.9 and sTRA |             | CA19.9      |             | sTRA        |             | Neither CA19.9 nor sTRA |             |
|----------------|----------------------|-------------|-------------|-------------|-------------|-------------|-------------------------|-------------|
|                | Fold Change          | Intensity   | Fold Change | Intensity   | Fold Change | Intensity   | Fold Change             | Intensity   |
| 1079.3749      | 0.5580               | 1030.2615   | 0.5620      | 1013.5629   | 0.7529      | 799.8649    | 0.0691                  | 681.6336    |
| 1136.3964      | 0.6459               | 676.5595    | 0.3493      | 637.1259    | 0.7473      | 578.7372    | 0.7534                  | 556.2163    |
| 1257.4226      | 0.1402               | 2654.0624   | -0.0147     | 2351.0033   | 0.3208      | 2490.4892   | 0.0796                  | 2039.8801   |
| 1282.4543      | 0.3096               | 2313.2134   | 0.3698      | 2365.8460   | 0.6335      | 2372.4875   | 0.3087                  | 1953.0532   |
| 1298.4492      | 0.2279               | 3618.3780   | 0.0596      | 3606.5293   | 0.4242      | 3475.8308   | 0.5033                  | 3542.7250   |
| 1419.4754      | -0.0708              | 4435.2276   | 0.0448      | 4359.8460   | -0.0115     | 4282.9775   | -0.0462                 | 4038.3505   |
| 1444.5071      | 0.2024               | 6781.2728   | 0.2931      | 7440.2953   | 0.6529      | 7254.8175   | 0.4100                  | 6397.8605   |
| 1460.5020      | 0.4495               | 1261.6067   | 0.2437      | 1421.0725   | 0.8493      | 1163.6526   | 0.5832                  | 1078.5609   |
| 1485.5337      | 0.3397               | 4496.9126   | 0.1656      | 4925.8533   | 0.7496      | 4141.5008   | 0.5373                  | 3847.4355   |
| 1501.5286      | 0.4488               | 3504.0746   | 0.1823      | 3252.7713   | 0.5833      | 3217.3858   | 0.6136                  | 3322.8205   |
| 1542.5552      | 0.6699               | 631.8115    | 0.0037      | 479.5078    | 0.5234      | 704.8998    | 0.2051                  | 472.3477    |
| 1581.5282      | 0.2772               | 3565.8188   | 0.2526      | 3591.4847   | 0.3927      | 2961.3900   | 0.1304                  | 2688.9080   |
| 1606.5599      | 0.3671               | 940.9854    | 0.4849      | 1080.3293   | 0.9305      | 1025.6925   | 0.6006                  | 931.9258    |
| 1647.5865      | 0.2576               | 10790.2408  | 0.2137      | 11085.4327  | 0.4937      | 11279.3008  | 0.3803                  | 11031.1855  |
| 1663.5814      | 0.2230               | 47111.1360  | 0.0303      | 48719.1733  | 0.4207      | 45885.2833  | 0.5582                  | 48841.2200  |
| 1688.6131      | 0.0528               | 2952.7942   | -0.2663     | 2889.9897   | 0.5822      | 3677.0442   | 0.0743                  | 2442.0707   |
| 1704.6080      | 0.9186               | 2452.2669   | 0.3307      | 2116.1872   | 1.1304      | 1949.8679   | 0.8319                  | 1476.5198   |
| 1743.5810      | -0.0583              | 8841.7870   | 0.0148      | 8836.4647   | -0.0550     | 7861.5800   | -0.1055                 | 7811.1225   |
| 1791.6489      | 0.4449               | 3437.4208   | 0.5246      | 4130.0147   | 1.1472      | 2999.8529   | 0.5074                  | 2359.7695   |
| 1809.6393      | 0.2343               | 126072.3760 | 0.3589      | 145564.3267 | 0.7564      | 141867.2083 | 0.5121                  | 119715.5000 |
| 1850.6659      | 0.4498               | 13157.5664  | 0.1981      | 13928.0233  | 0.8493      | 14265.8200  | 0.5151                  | 11948.0795  |
| 1866.6608      | 0.6915               | 5408.9500   | 0.3092      | 4009.2933   | 0.8292      | 4745.9275   | 0.6856                  | 5016.9438   |
| 1891.6925      | 0.0593               | 771.5054    | 0.2295      | 1007.8143   | -0.1452     | 546.2488    | -0.7741                 | 468.9750    |
| 1905.6338      | -0.3614              | 4891.3512   | -0.1989     | 5941.8553   | -0.0484     | 4008.0575   | -0.1055                 | 4541.7310   |
| 1911.5859      | 0.0774               | 9652.6898   | -0.2242     | 10247.3253  | 0.2193      | 9037.3833   | 0.6677                  | 11668.2585  |
| 1955.6972      | -0.2590              | 7289.5402   | -0.0843     | 7869.6207   | -0.0750     | 6896.1758   | -0.3268                 | 6893.2070   |
| 1996.7238      | 0.8381               | 4608.1824   | 0.6761      | 3736.5147   | 0.5950      | 3428.9295   | -0.2268                 | 2940.5792   |
| 2012.7187      | 0.4143               | 43498.1460  | 0.3009      | 45450.9400  | 0.9035      | 51220.2250  | 0.4612                  | 38769.4650  |
| 2028.7136      | 0.4012               | 9839.5872   | 0.2221      | 10008.1940  | 0.7816      | 9078.7983   | 0.8338                  | 9383.0765   |
| 2057.6438      | 0.0535               | 18426.9780  | 0.1073      | 21937.0833  | 0.4448      | 20046.7167  | 0.5167                  | 21521.1305  |
| 2101.7551      | -0.0692              | 7501.7748   | 0.0102      | 8503.1773   | 0.6562      | 7969.7775   | 0.2302                  | 7388.0085   |
| 2158.7766      | 0.4011               | 11363.7478  | 0.3342      | 9282.0100   | -0.0345     | 7989.2683   | -0.5551                 | 7531.1735   |
| 2174.7715      | 0.2815               | 53484.7100  | 0.4252      | 57246.1800  | 0.7232      | 64477.1917  | 0.5321                  | 59652.0200  |
| 2215.7980      | 0.9590               | 4382.5464   | 0.5851      | 4778.4880   | 1.2673      | 3955.2642   | 0.4642                  | 3491.0819   |
| 2232.7964      | 0.9598               | 4320.7963   | 0.8038      | 3384.2840   | 1.4892      | 2737.8392   | 0.8888                  | 2981.5574   |
| 2304.8345      | 0.8943               | 6529.6180   | 0.9264      | 6704.9727   | 0.5532      | 3284.2436   | -0.2947                 | 3249.5261   |
| 2320.8294      | -0.1965              | 6459.7967   | -0.1060     | 6053.7300   | 0.1800      | 5034.5917   | -0.4141                 | 5075.9610   |
| 2377.8509      | 0.4545               | 16636.5238  | 0.2718      | 14331.7167  | 0.9078      | 18517.2333  | 0.2226                  | 17797.5590  |
| 2393.8458      | 0.5722               | 4319.5450   | 0.4443      | 4369.4367   | 1.2084      | 3761.7533   | 1.2048                  | 3747.1576   |
| 2466.8873      | -0.2042              | 8261.3122   | -0.1177     | 8194.9387   | 0.2008      | 8662.9767   | -0.3248                 | 8401.9900   |
| 2507.9139      | 0.6044               | 2482.9564   | 0.8787      | 2573.6232   | -0.4874     | 1244.8233   | -0.7505                 | 1571.1613   |
| 2523.9088      | 0.6238               | 8240.1160   | 0.4511      | 6913.1740   | 0.5957      | 5074.2350   | -0.5965                 | 4028.8324   |
| 2539.9037      | 0.0839               | 34950.5440  | 0.2730      | 34169.4800  | 0.5440      | 47457.7000  | 0.3586                  | 46961.3775  |
| 2581.9336      | 0.9281               | 3156.8733   | 0.4690      | 3384.8950   | 0.8477      | 2477.0816   | 0.2002                  | 3008.1229   |
| 2613.9486      | -0.5574              | 1040.7924   | -0.1643     | 1097.4909   | -1.0460     | 1052.5307   | -1.6169                 | 1427.1412   |
| 2669.9667      | 1.2122               | 3157.0727   | 0.8713      | 3087.5575   | 0.5335      | 865.8589    | -0.6530                 | 927.7440    |
| 2685.9616      | -0.3670              | 6207.3348   | -0.2400     | 5973.3425   | -0.0170     | 5614.4558   | -0.6943                 | 5776.5140   |
| 2742.9831      | 0.9924               | 11120.2304  | 0.8345      | 10064.4913  | 1.9265      | 8673.5875   | 0.5077                  | 5522.0960   |
| 2832.0195      | -0.3598              | 7215.8054   | -0.3907     | 6264.5160   | -0.0894     | 7355.2933   | -0.6649                 | 7728.5317   |
| 2890.0444      | 1.1449               | 5095.1726   | 0.4796      | 4355.5224   | 1.0930      | 1939.7393   | -0.6336                 | 1792.3854   |
| 2906.0393      | 0.3592               | 13588.1608  | 0.5779      | 16725.3580  | 1.1644      | 16365.6783  | 1.0149                  | 14296.7880  |
| 2979.0808      | -0.7050              | 2110.1836   | -0.8280     | 3538.4809   | -0.7391     | 1756.5904   | -1.4827                 | 2281.3808   |
| 3036.1023      | 0.9367               | 12185.8834  | 0.6211      | 7251.7120   | 0.2973      | 6190.2181   | -0.7168                 | 5473.1566   |
| 3109.1187      | 0.7600               | 3619.1301   | 0.8687      | 3715.9760   | 0.6550      | 3580.1689   | 0.4216                  | 3847.6254   |
| 3124.1102      | -0.0703              | 1367.6939   | -0.2554     | 1744.9258   | -0.2194     | 1498.8243   | -0.9417                 | 1624.6381   |
| 3198.1551      | -0.5800              | 4070.1716   | -0.4382     | 4077.9780   | -0.6499     | 5322.4083   | -0.9959                 | 4366.8126   |
| 3255.1766      | 0.4646               | 4019.1874   | 0.3279      | 3363.3185   | 0.2530      | 2510.7031   | -0.5447                 | 2158.0608   |
| 3270.1681      | 0.3299               | 2498.8385   | 0.7281      | 3600.9105   | 1.3078      | 3232.0292   | 0.7372                  | 2983.1392   |
| 3328.2181      | 0.9078               | 6558.7212   | 1.1305      | 6332.3680   | -0.0396     | 3531.0183   | -0.1763                 | 3367.1860   |
| 3636.3037      | 0.0741               | 7494.0596   | 0.4479      | 8220.9520   | 0.4143      | 10278.0333  | 0.2161                  | 10434.0220  |
| 3709.3452      | -0.6620              | 2239.3698   | -0.7074     | 2430.1141   | -0.7433     | 3195.2648   | -1.0279                 | 2632.6308   |
| 3855.4031      | -0.4590              | 2145.1399   | -0.5476     | 1865.9784   | -0.7010     | 3220.6986   | -0.9423                 | 3064.2660   |



**Table S4. Log<sub>2</sub>FC and AUP intensity data for biomarker-classified TMA core groupings.** Log<sub>2</sub>FC of area under the peak (AUP) measurements for 62 N-glycan masses between individual patient normal and tumor cores were calculated then averaged for the 4 biomarker-designations. Positive values represent enrichment in tumor tissue. Shown too are the average tumor AUP intensities for each N-glycan in each category.



**Table S5. Log<sub>2</sub>FC and AUP intensity data for AA-stabilized TMA cores.** Log<sub>2</sub>FC of area under the peak (AUP) measurements for 84 AA-stabilized sialylated N-glycan masses between individual patient normal and tumor cores were calculated then averaged for the 4 biomarker-designations. Positive values represent enrichment in tumor tissue. Shown too are the average tumor AUP intensities for each sialylated N-glycan in each category.

# Annotation of Reported N-glycan Structures by CID Fragmentation

## timsTOF Flex MALDI-QTOF MS/MS Settings

### Transfer

Funnel 1 RF: 425.0 Vpp  
 Funnel 2: RF: 500.0 Vpp  
 Multipole RF: 550.0 Vpp  
 Deflection  $\Delta$ : 70.0 V  
 MALDI Plate Offset: 50.0 V

### MS Settings

Scan Begin: 50 *m/z*  
 Scan End: 2500 *m/z*  
 Ion Polarity: Positive  
 Scan Mode: MS/MS  
 Laser Shots: 400  
 Laser Power: 36%  
 Frequency: 10000 Hz

### Pre-TOF Focus

Transfer Time: 72.0  $\mu$ s  
 Pre-Pulse Storage: 12.0  $\mu$ s

### Collision Cell

Collision Energy: 25.0 eV  
 Collision RF: 1500.0 Vpp

### Quadrupole

Ion Energy: 4.0 eV  
 Low Mass: 150 *m/z*

### CID Settings

Isolation Width: 10.00 *m/z*  
 Collision Energy: 150.00 eV

## Notes on CID

CID fragmentation of 23 N-glycan base structures representing a mix of both core and terminally-fucosylated bi-, tri- and tetra-antennary configurations with and without bisecting GlcNAc residues. Where applicable EndoF3 was used to trim higher-mass core-fucosylated N-glycans to improve CID performance

## CID Legend

X,Y,Z ions

B,C ions

Intermixed X,Y,Z/B,C ions

Precursor ions

## Example MS/MS

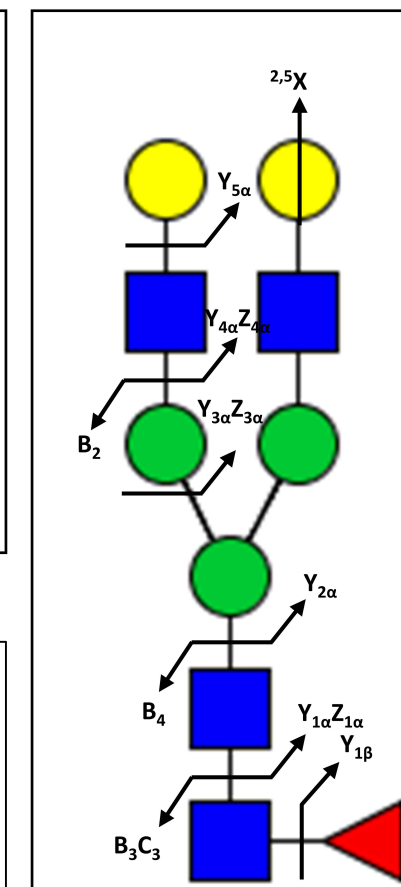

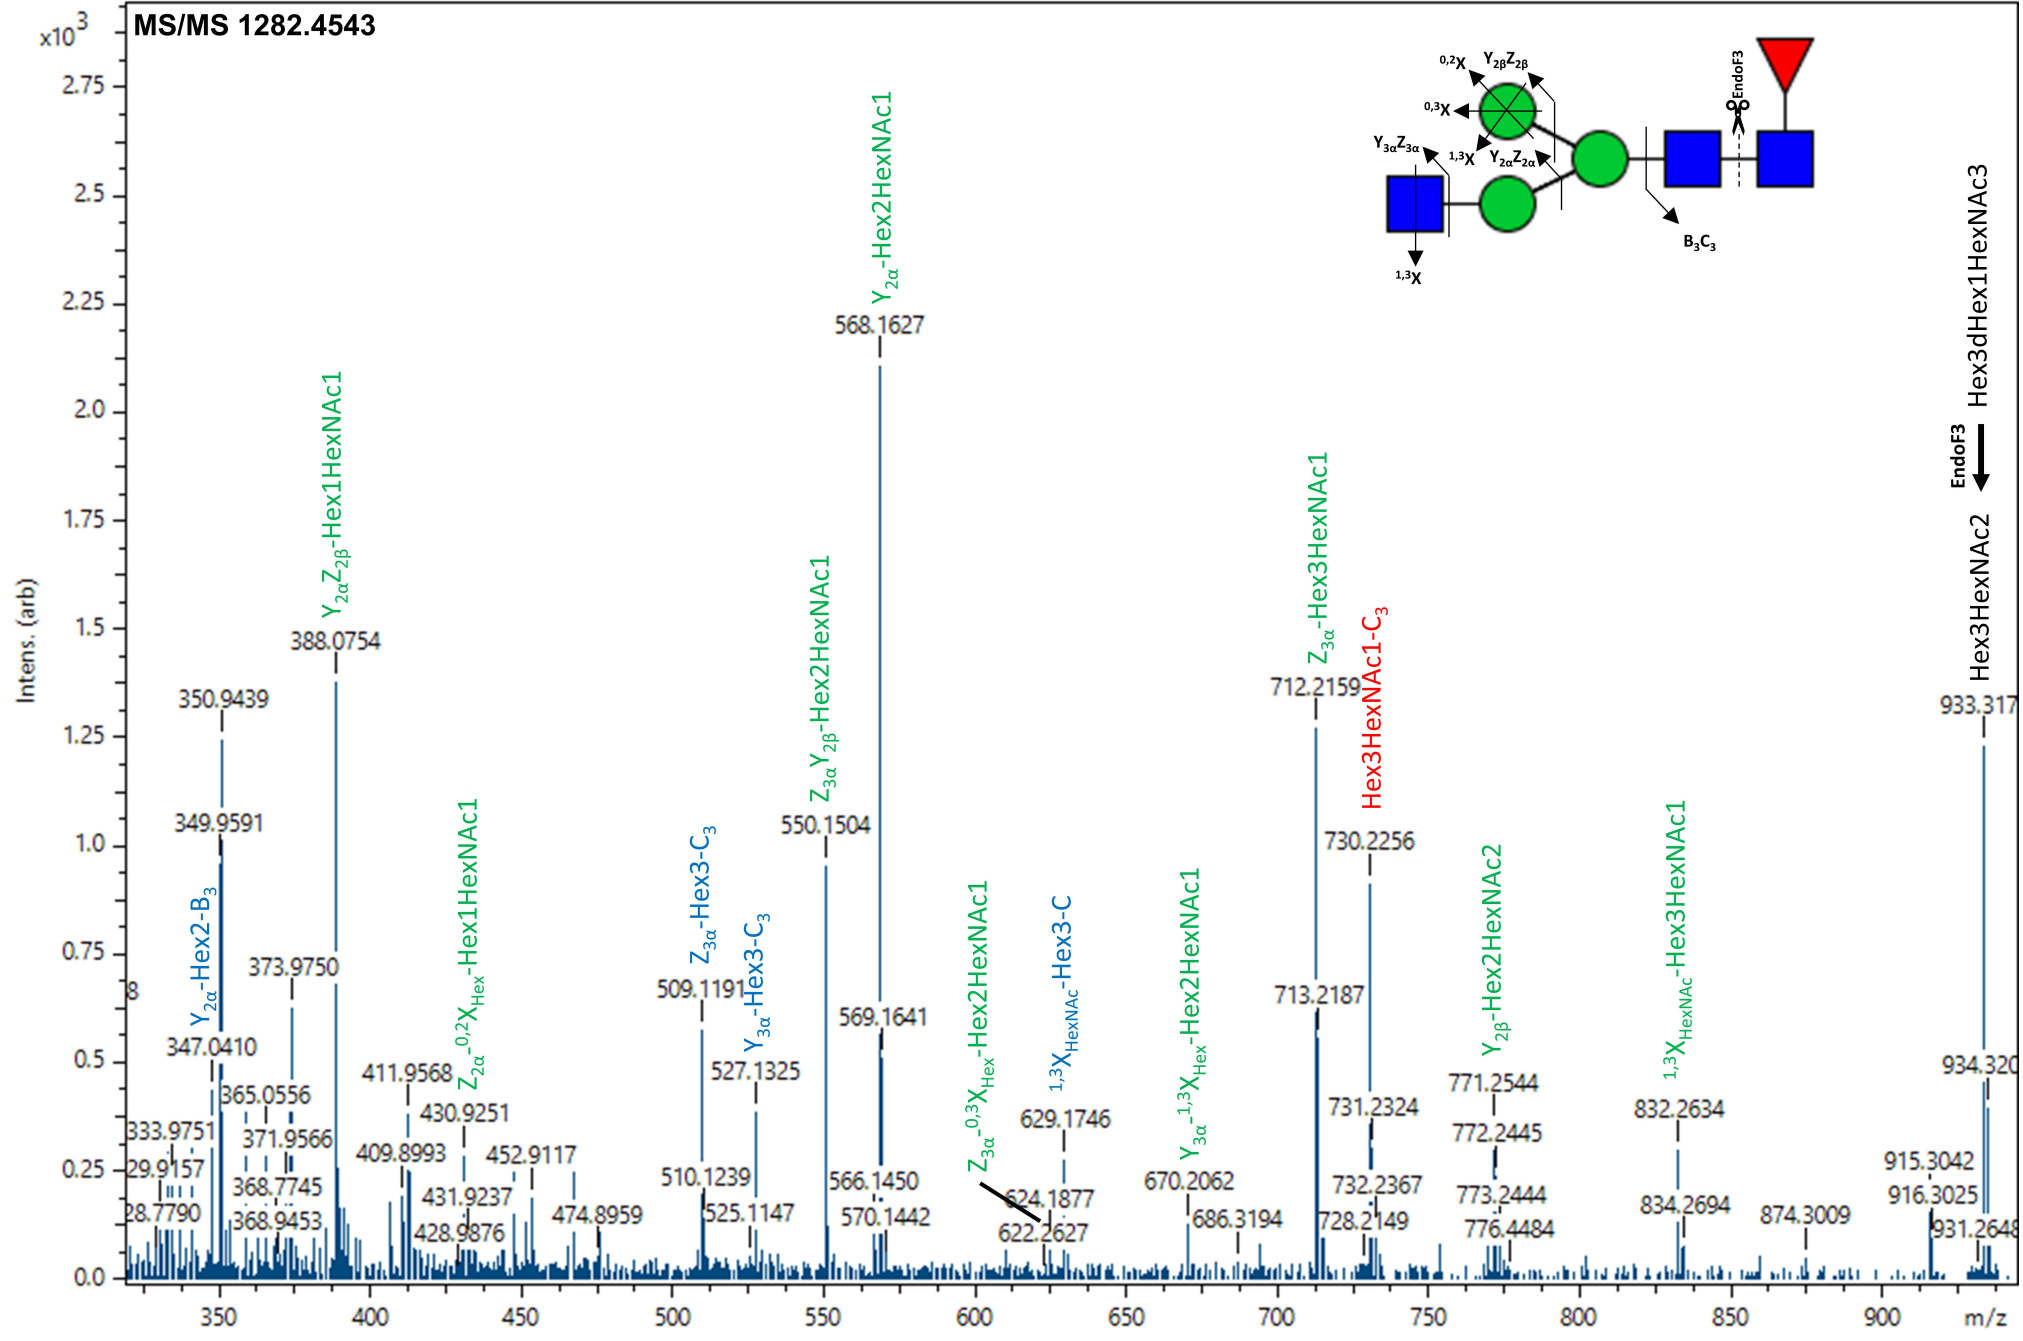

## MS/MS 1444.5071

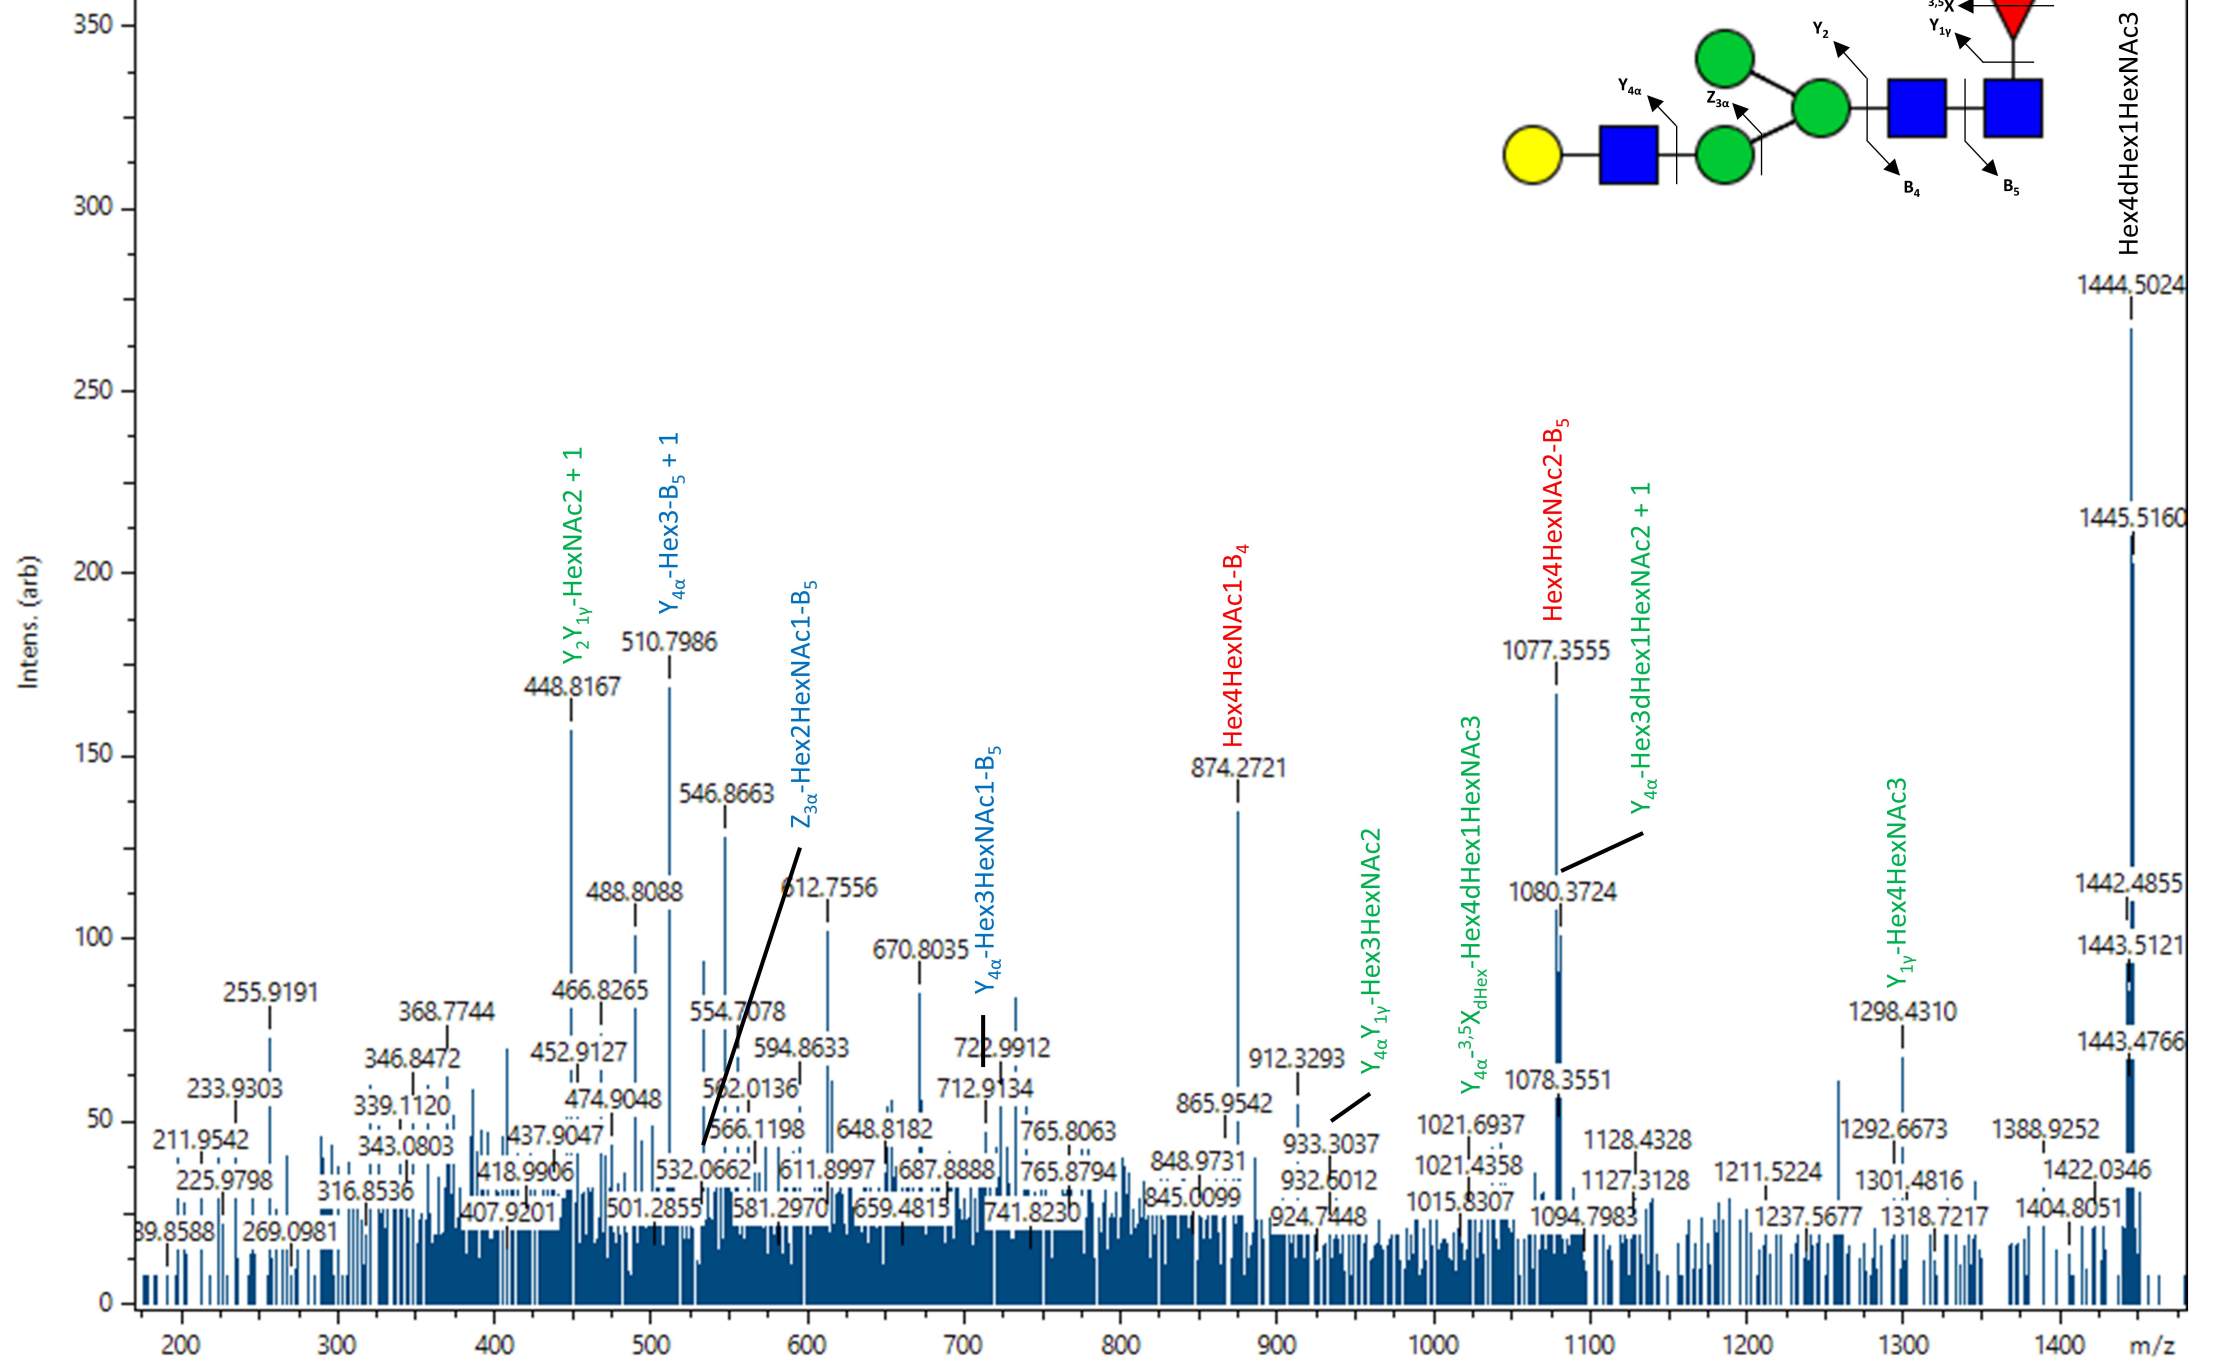

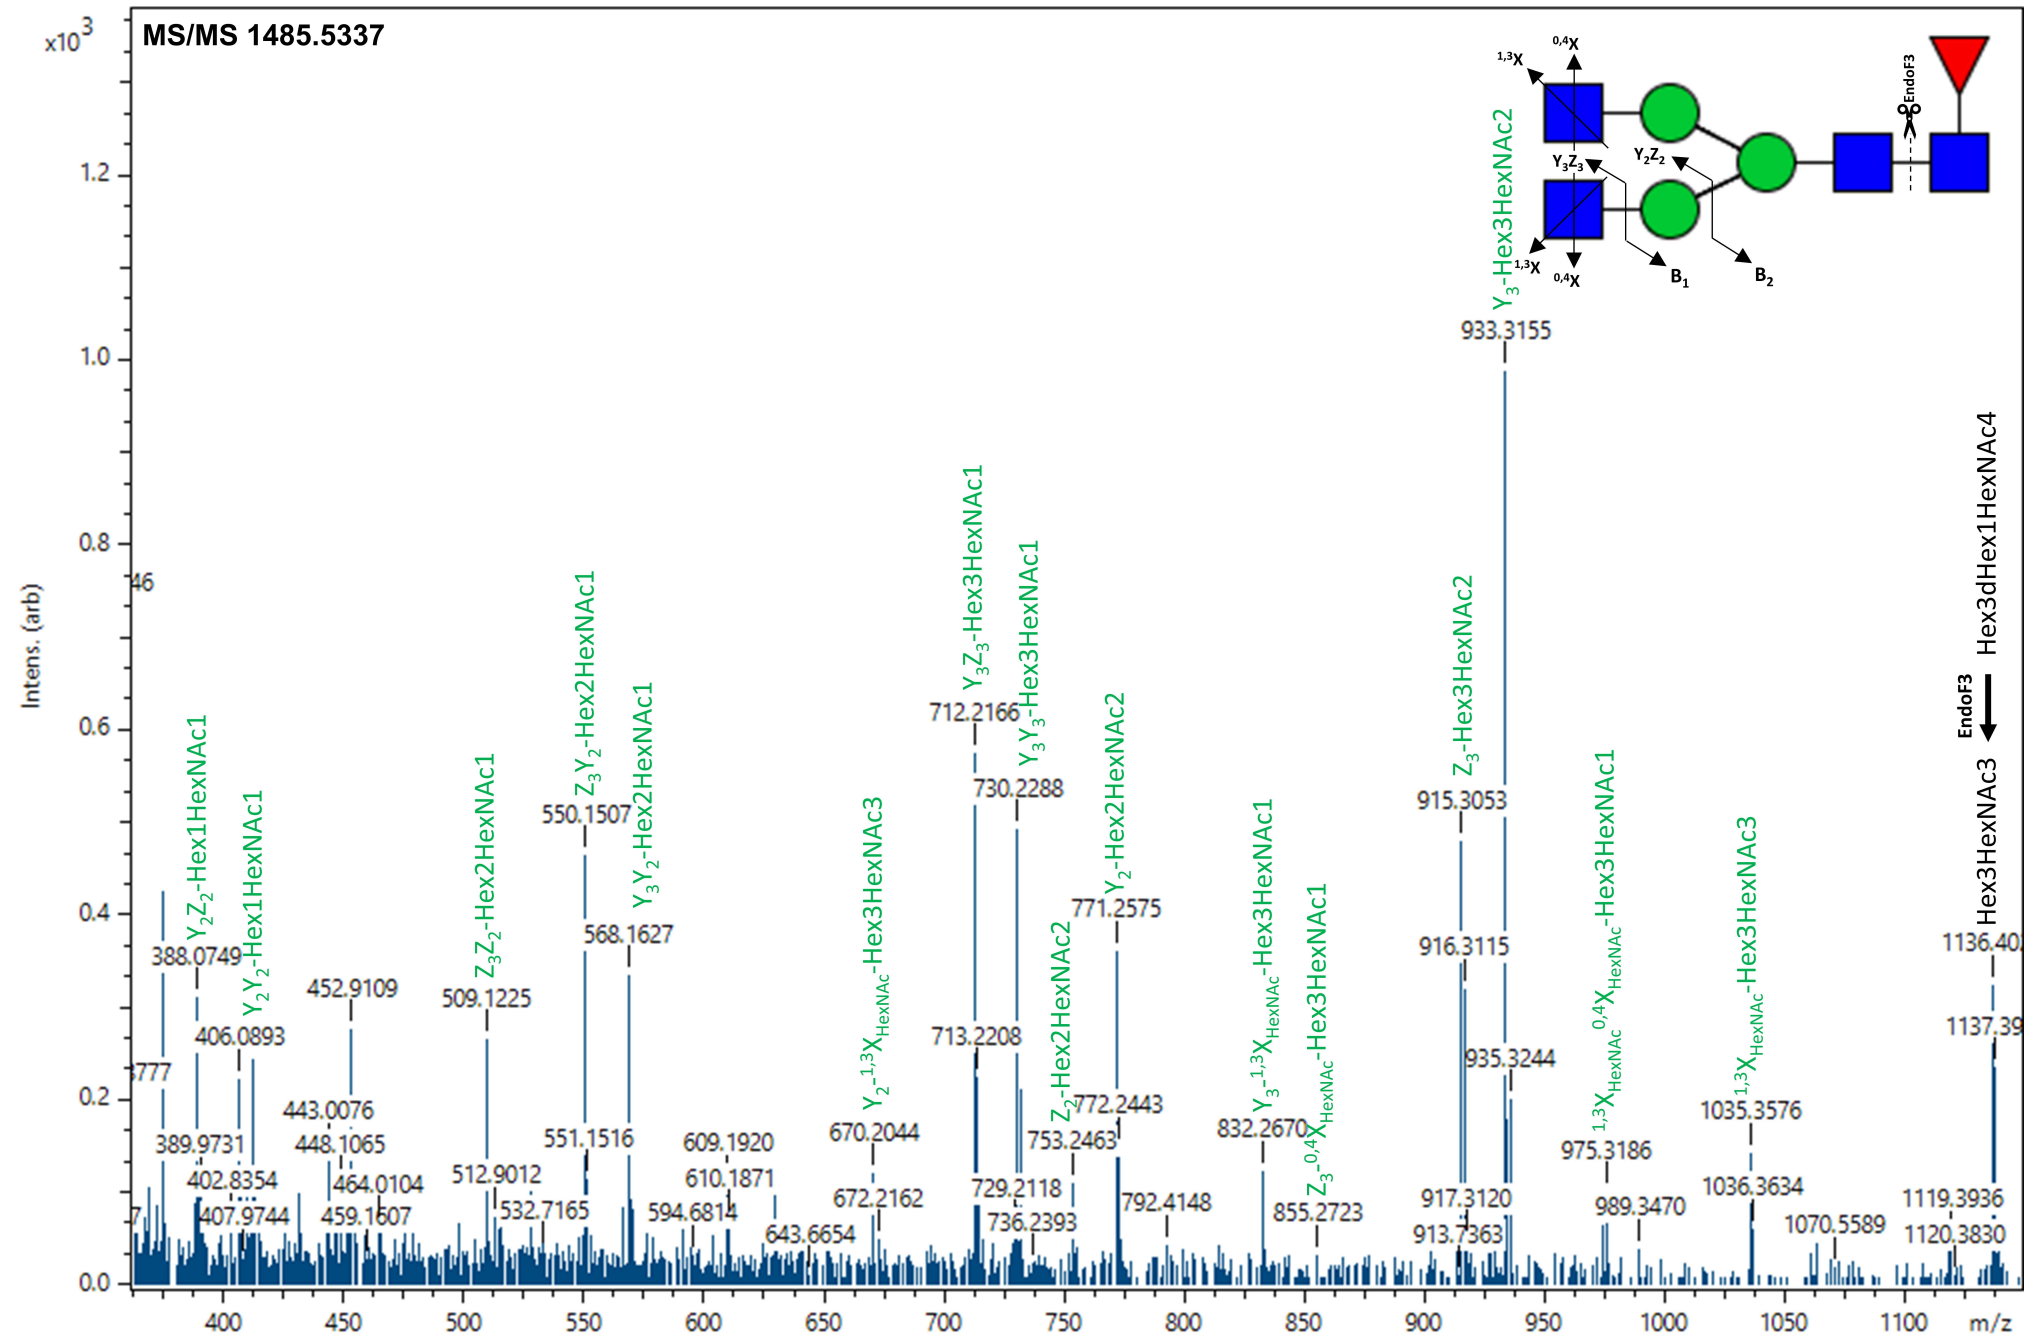

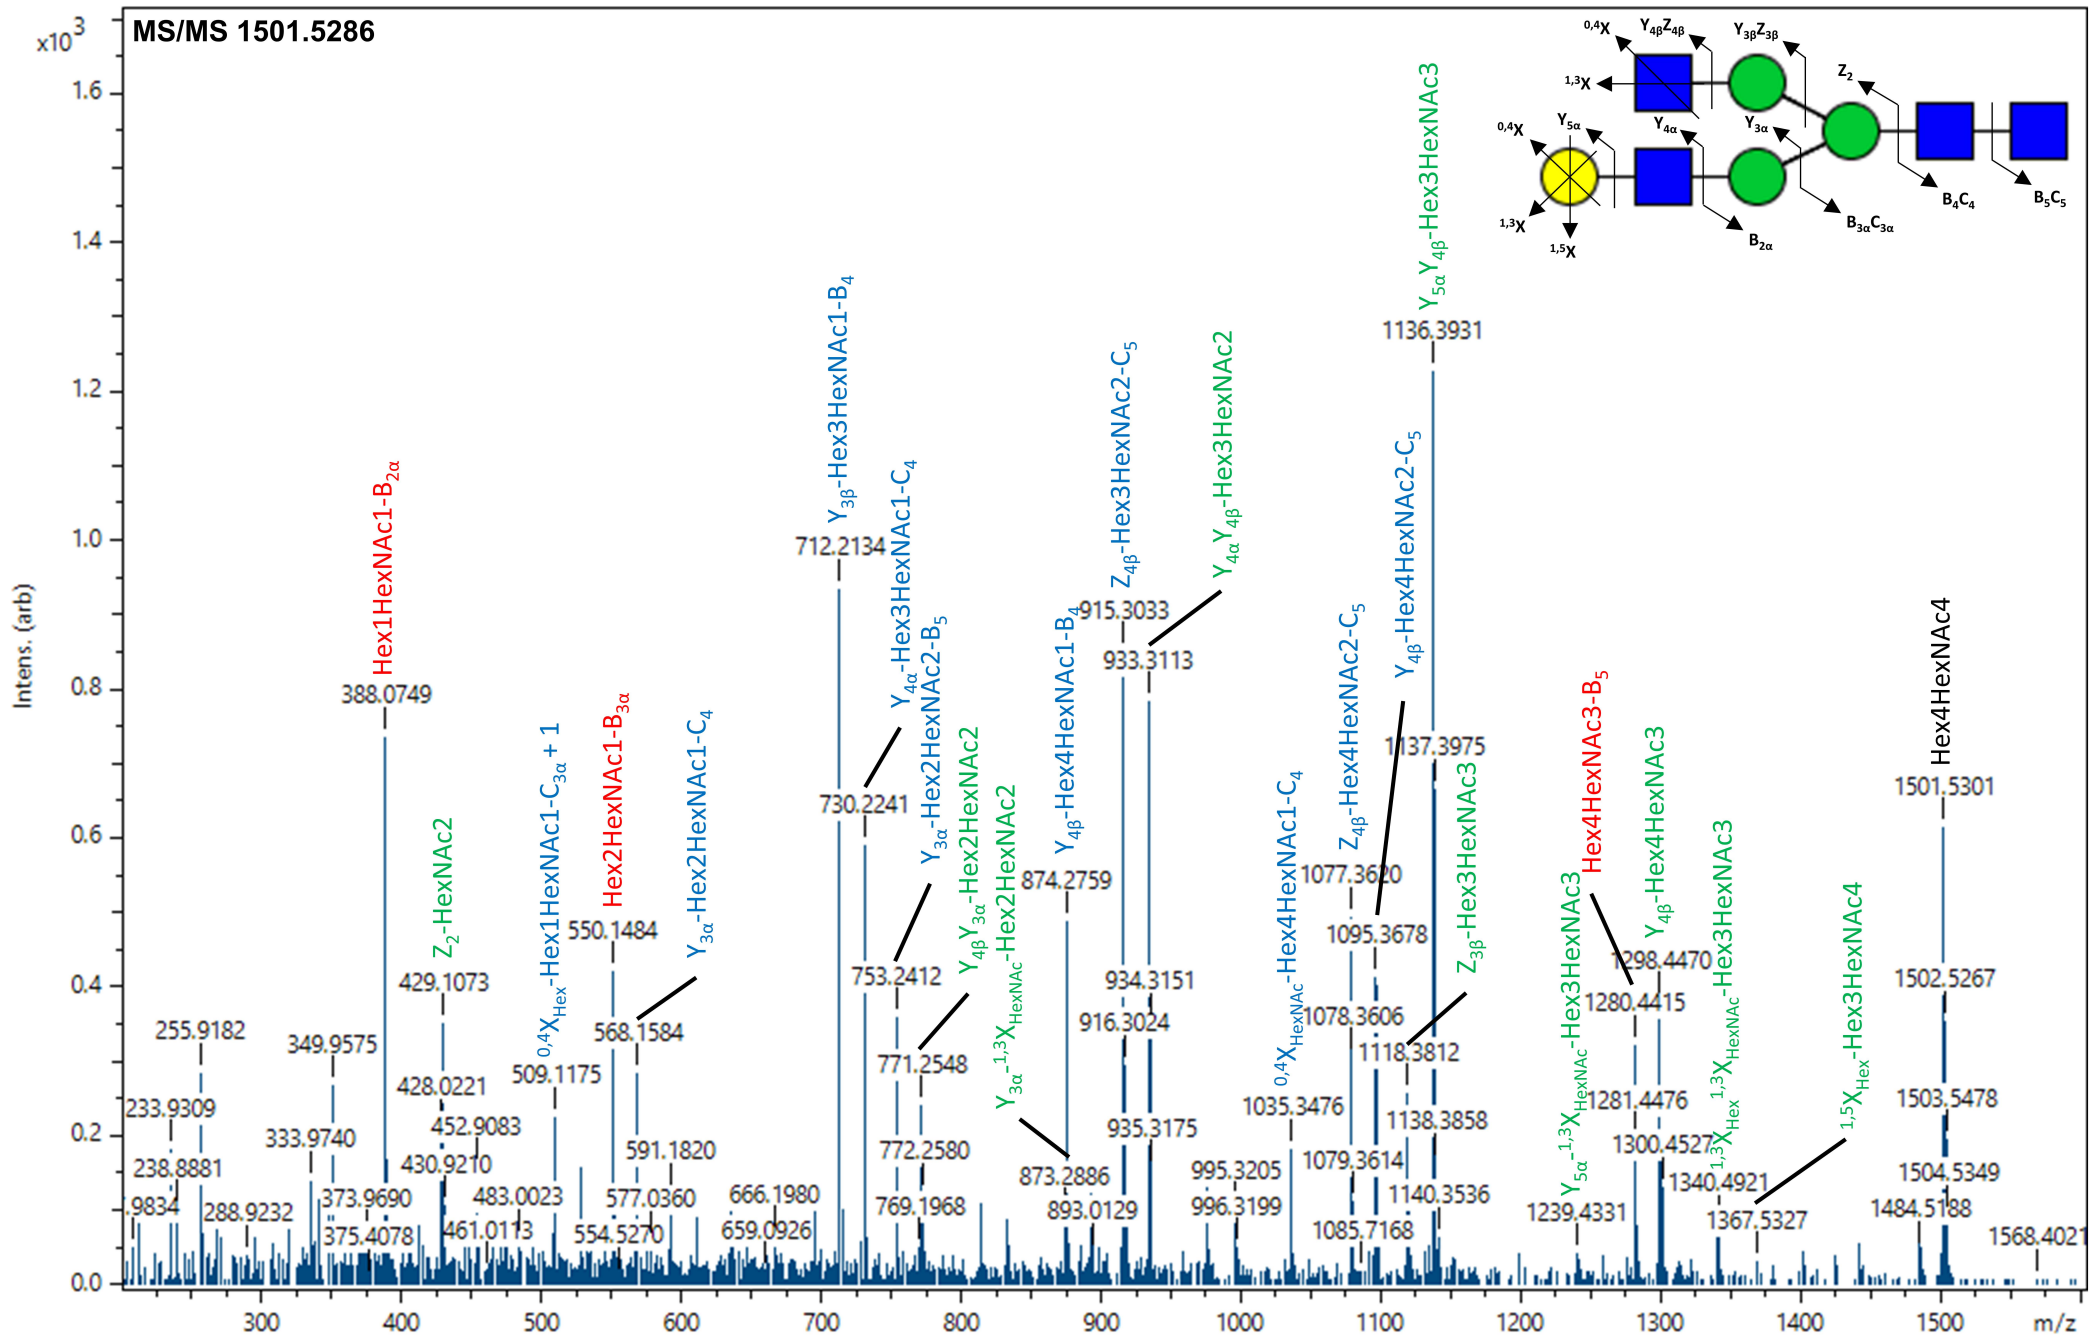



MS/MS 1581.5282

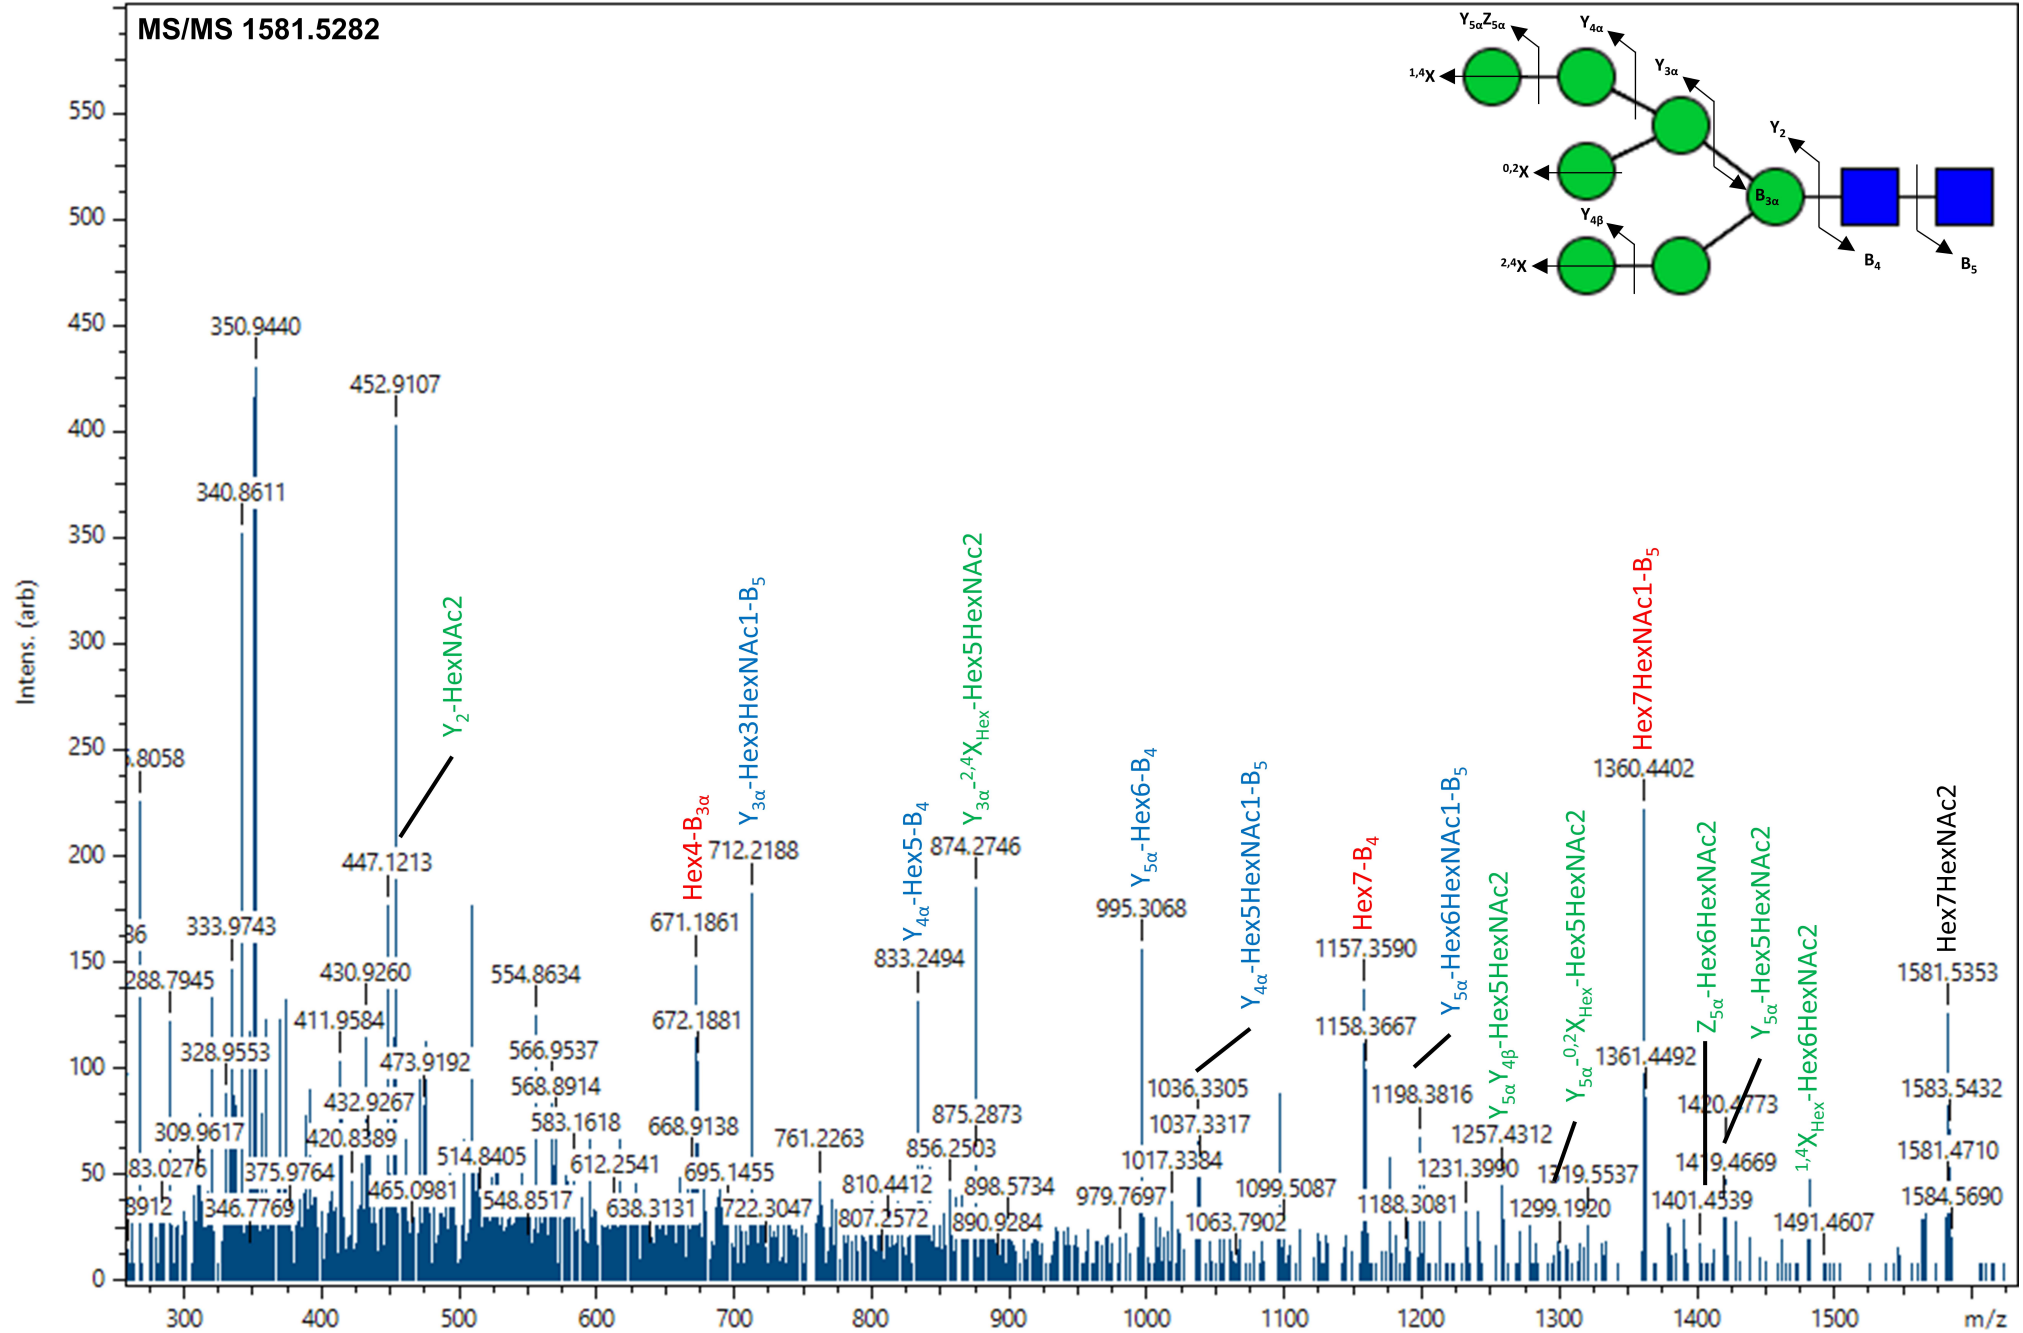

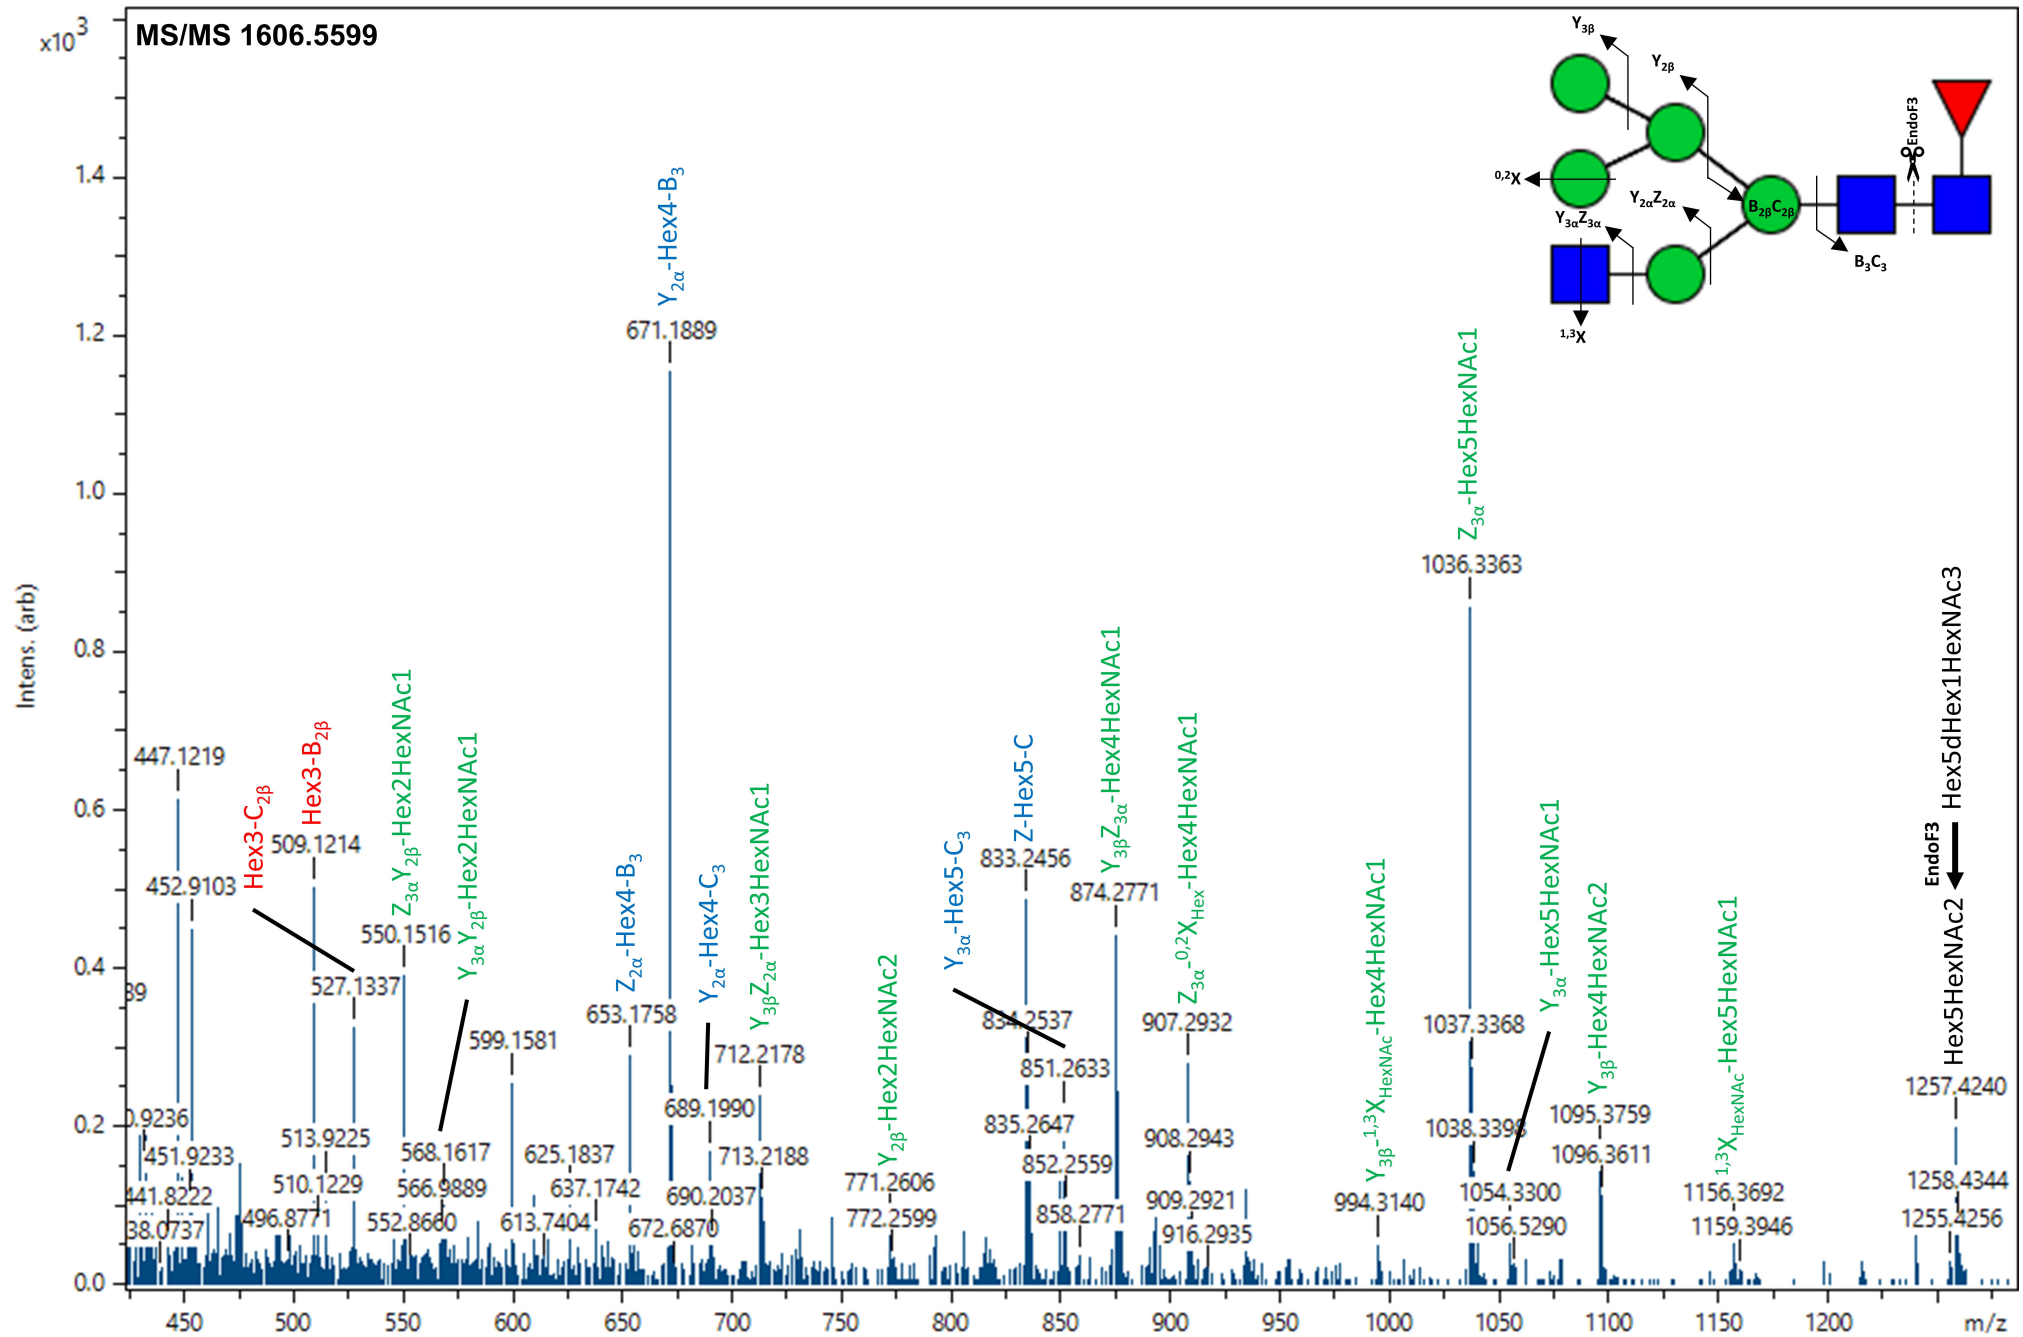

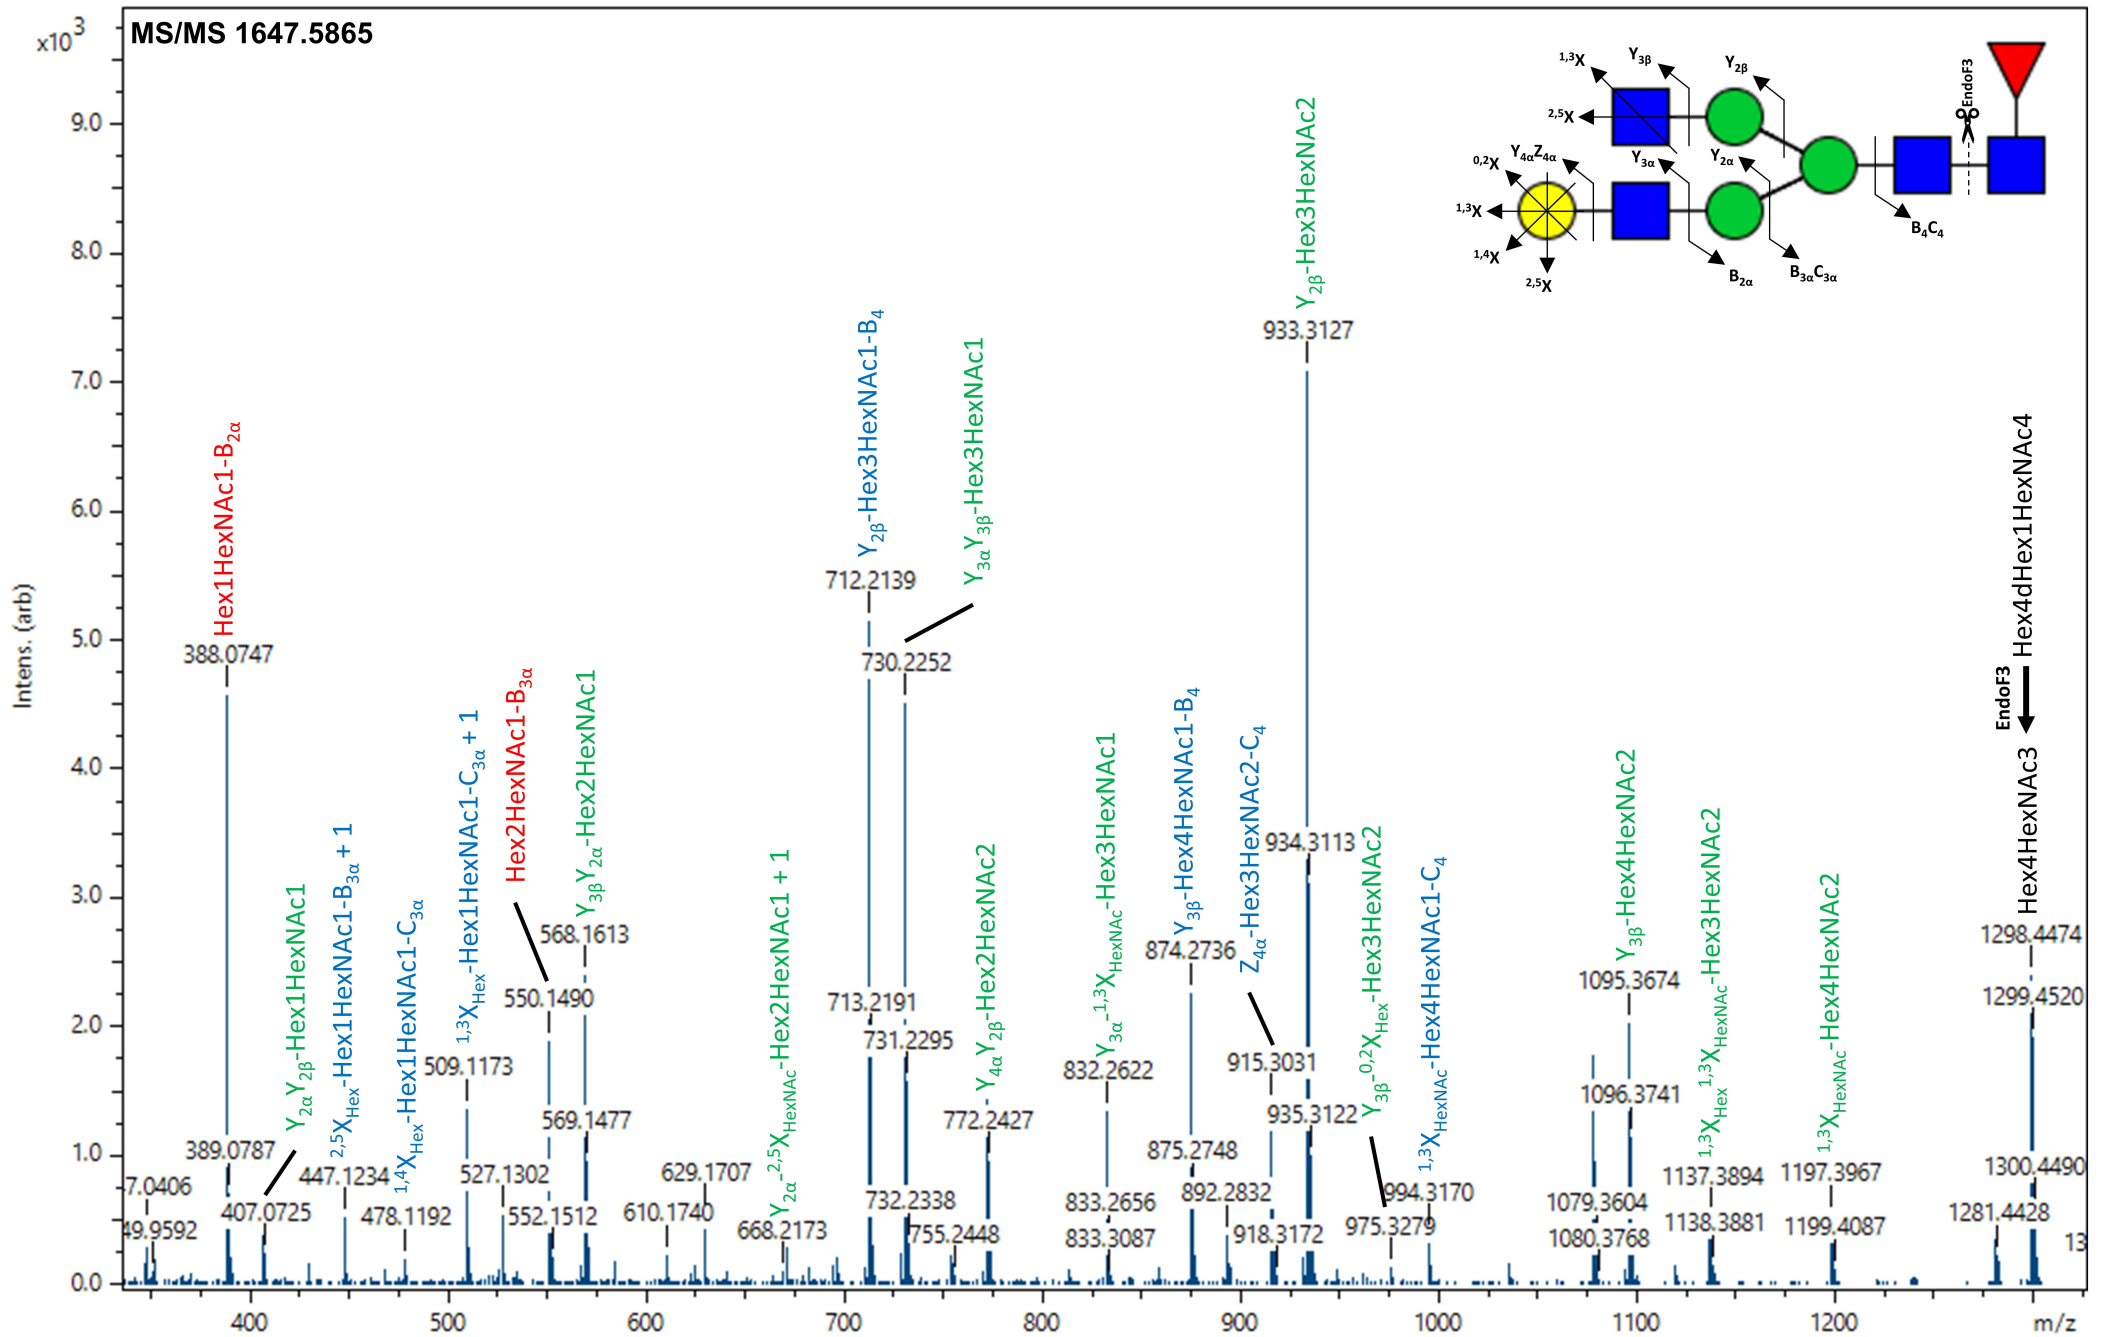

MS/MS 1663.5814

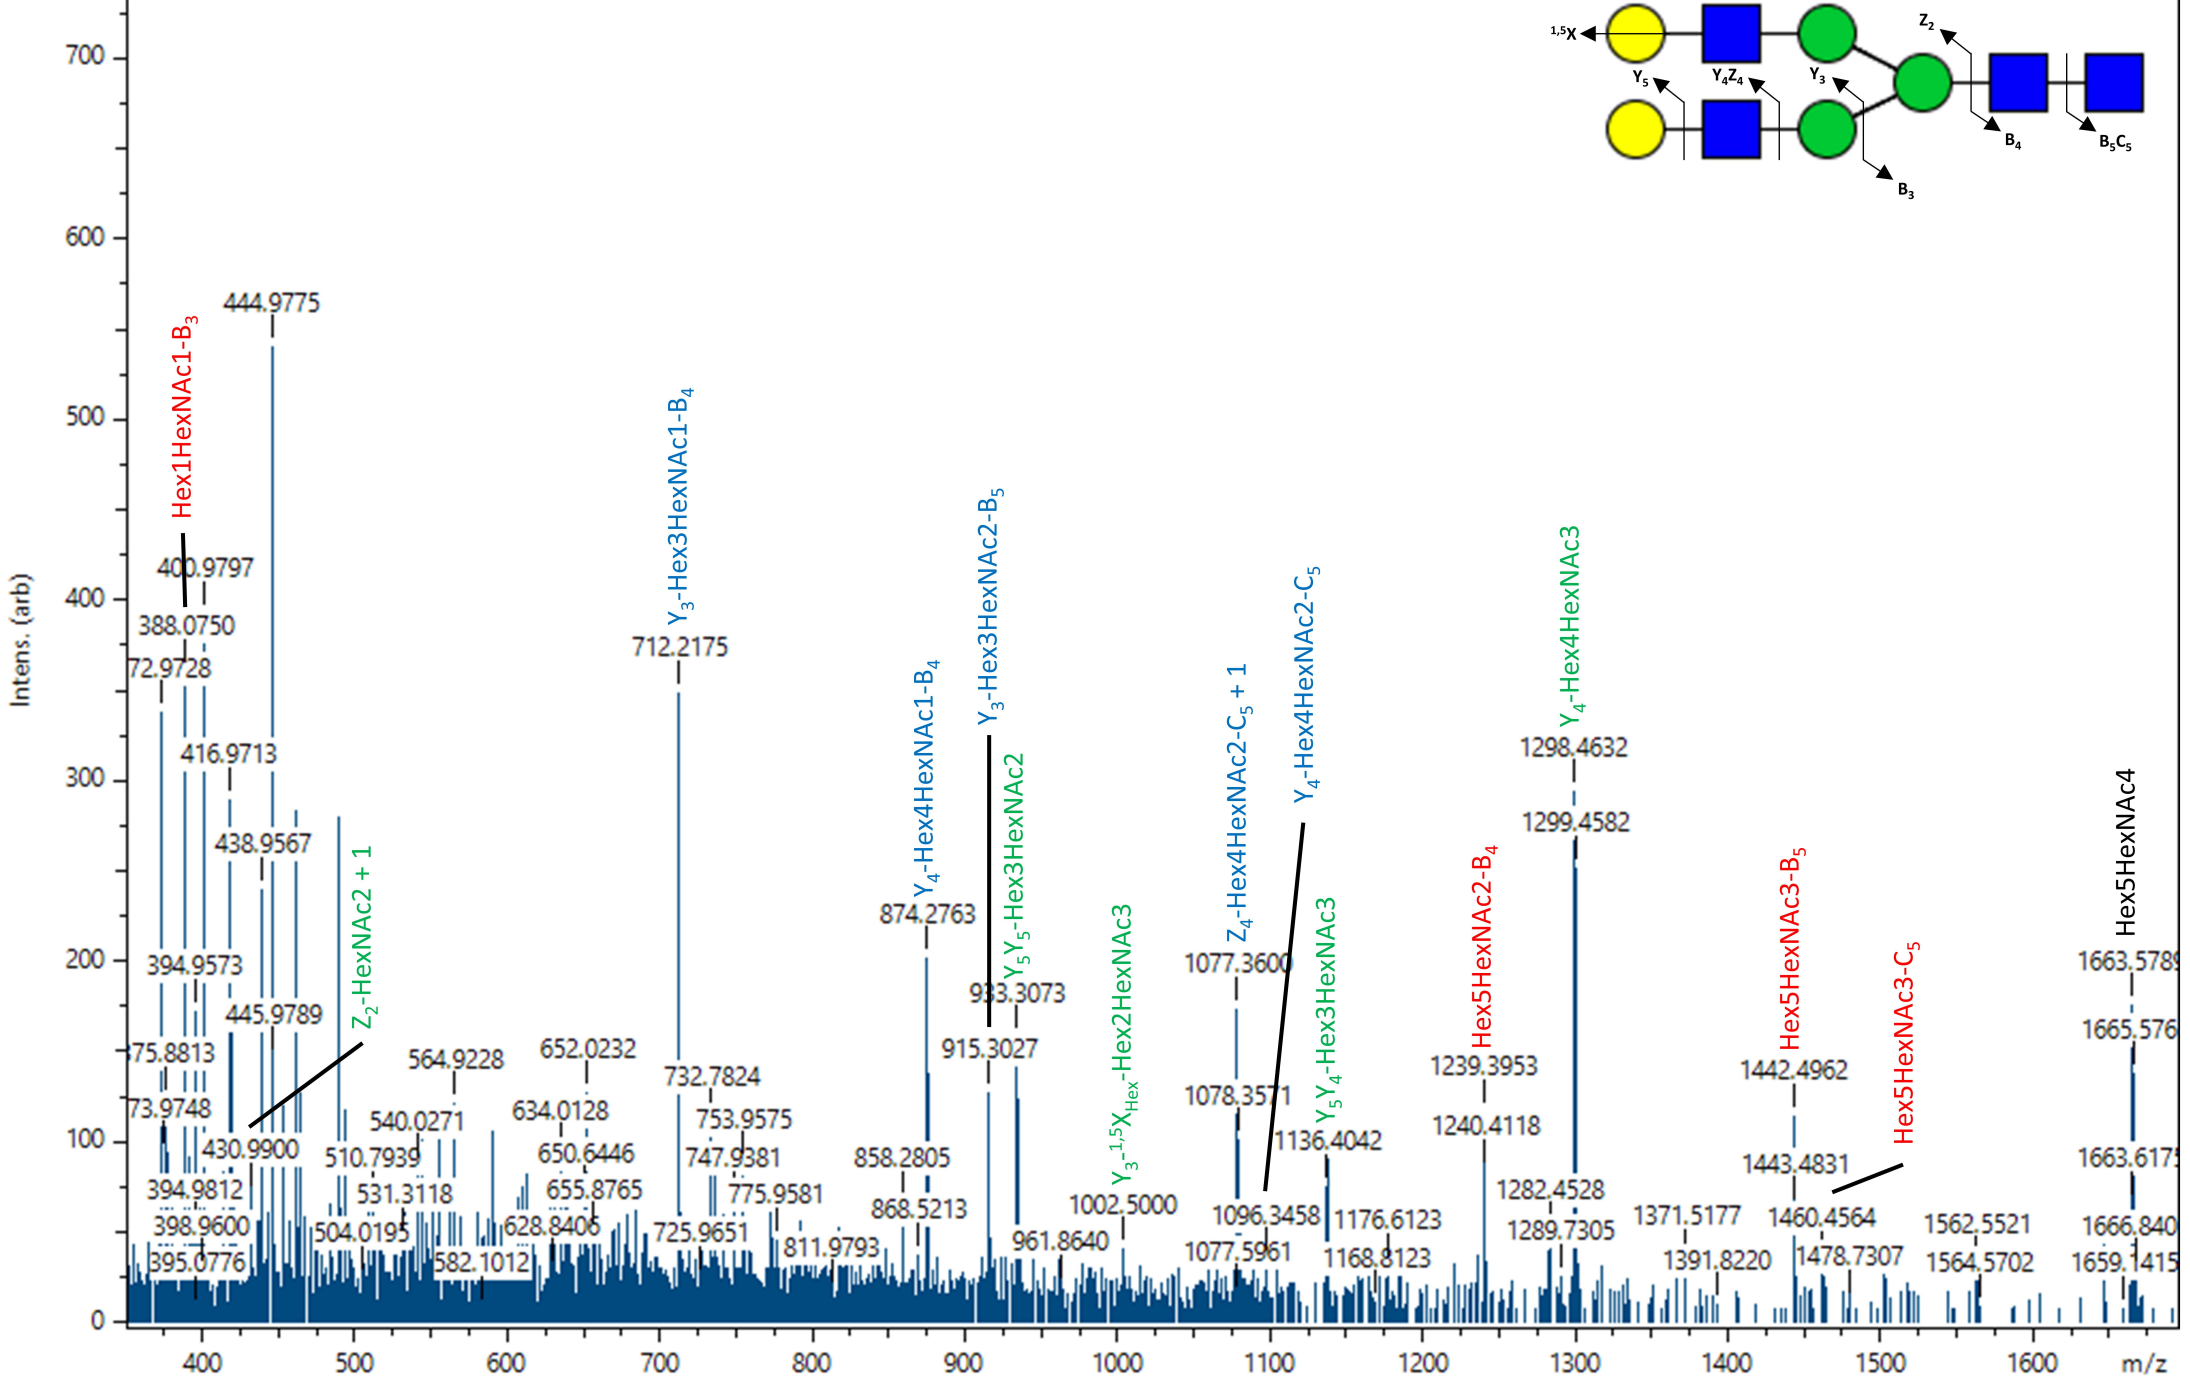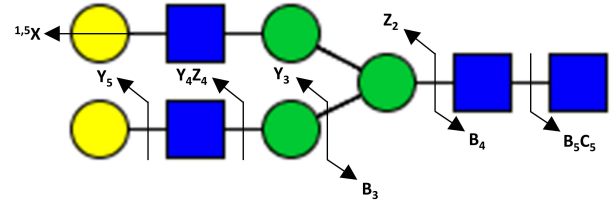

MS/MS 1743.5810

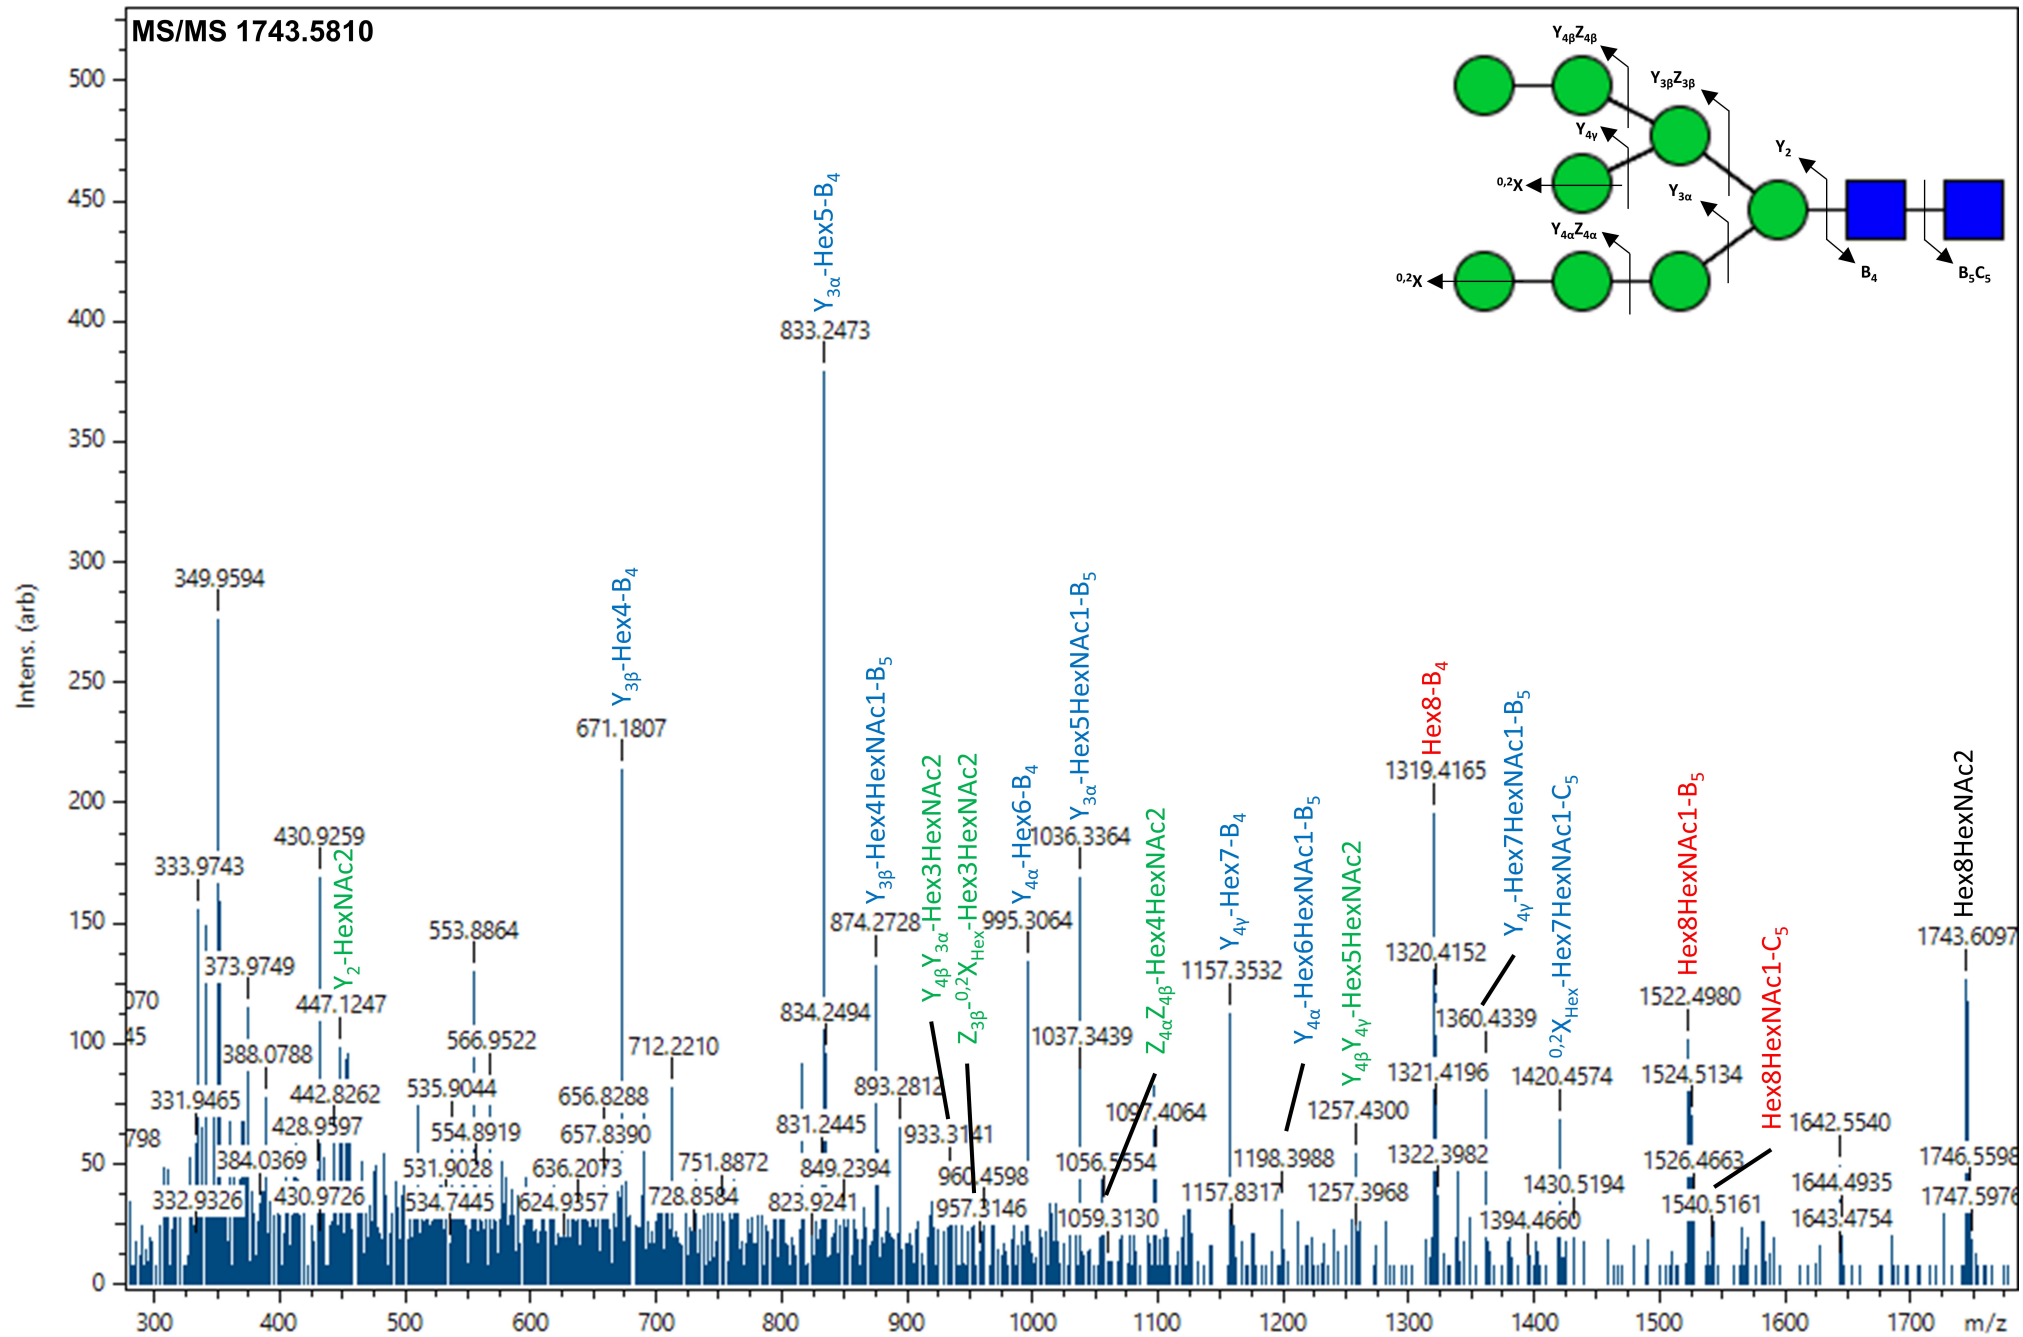

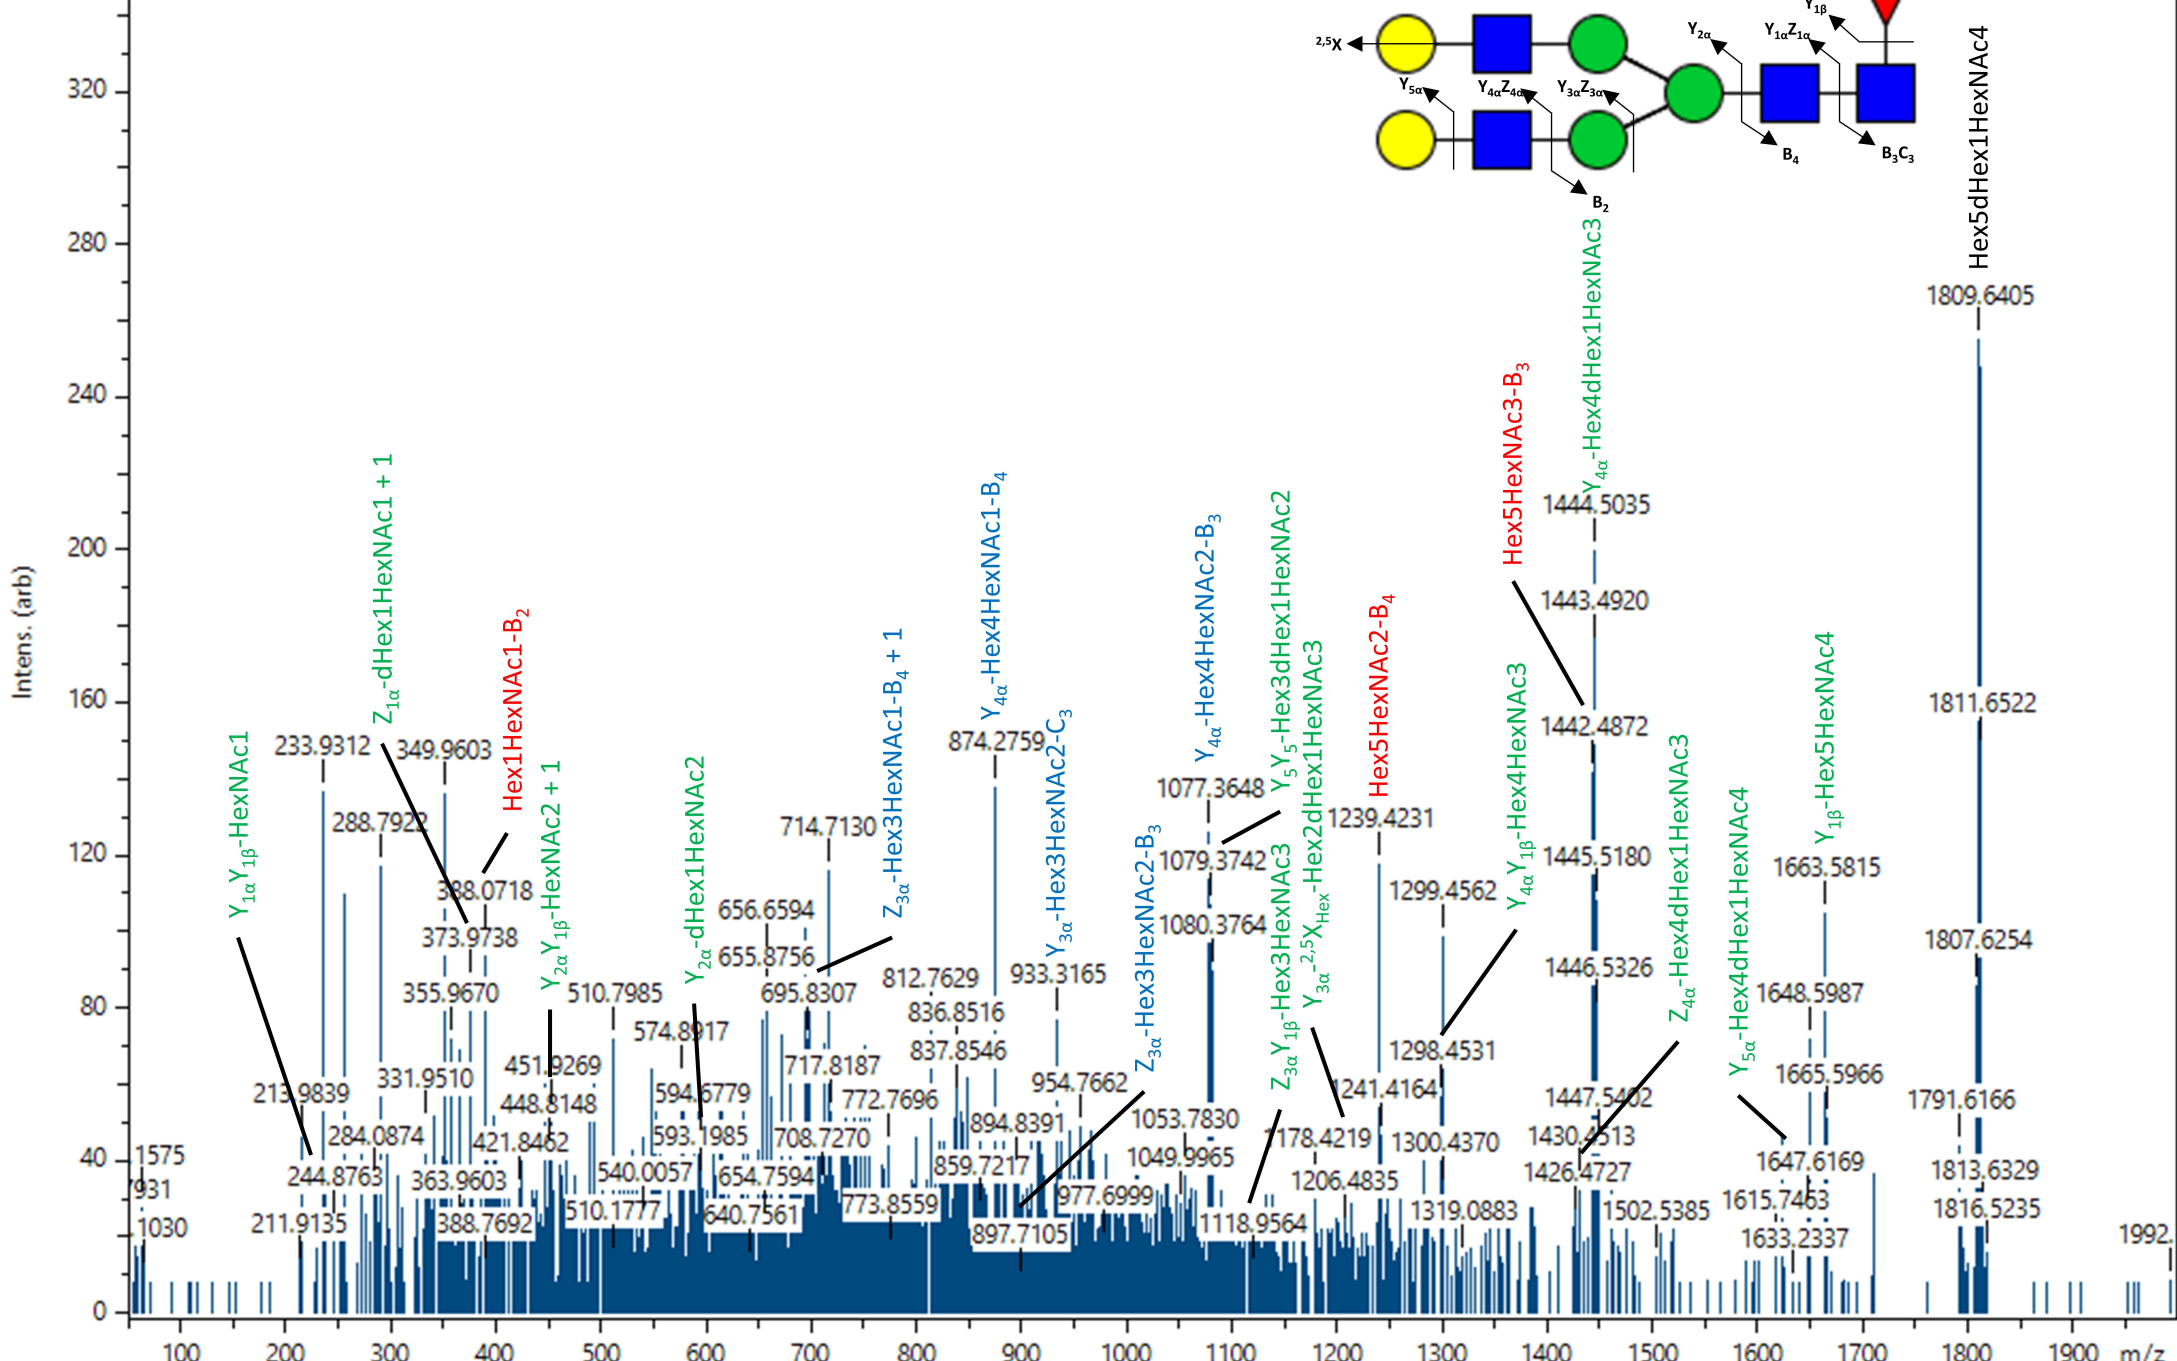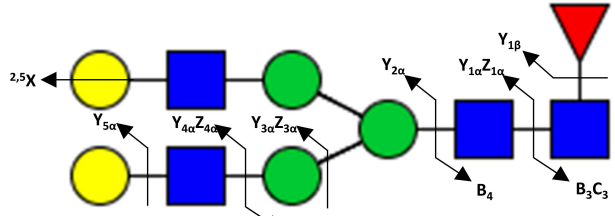

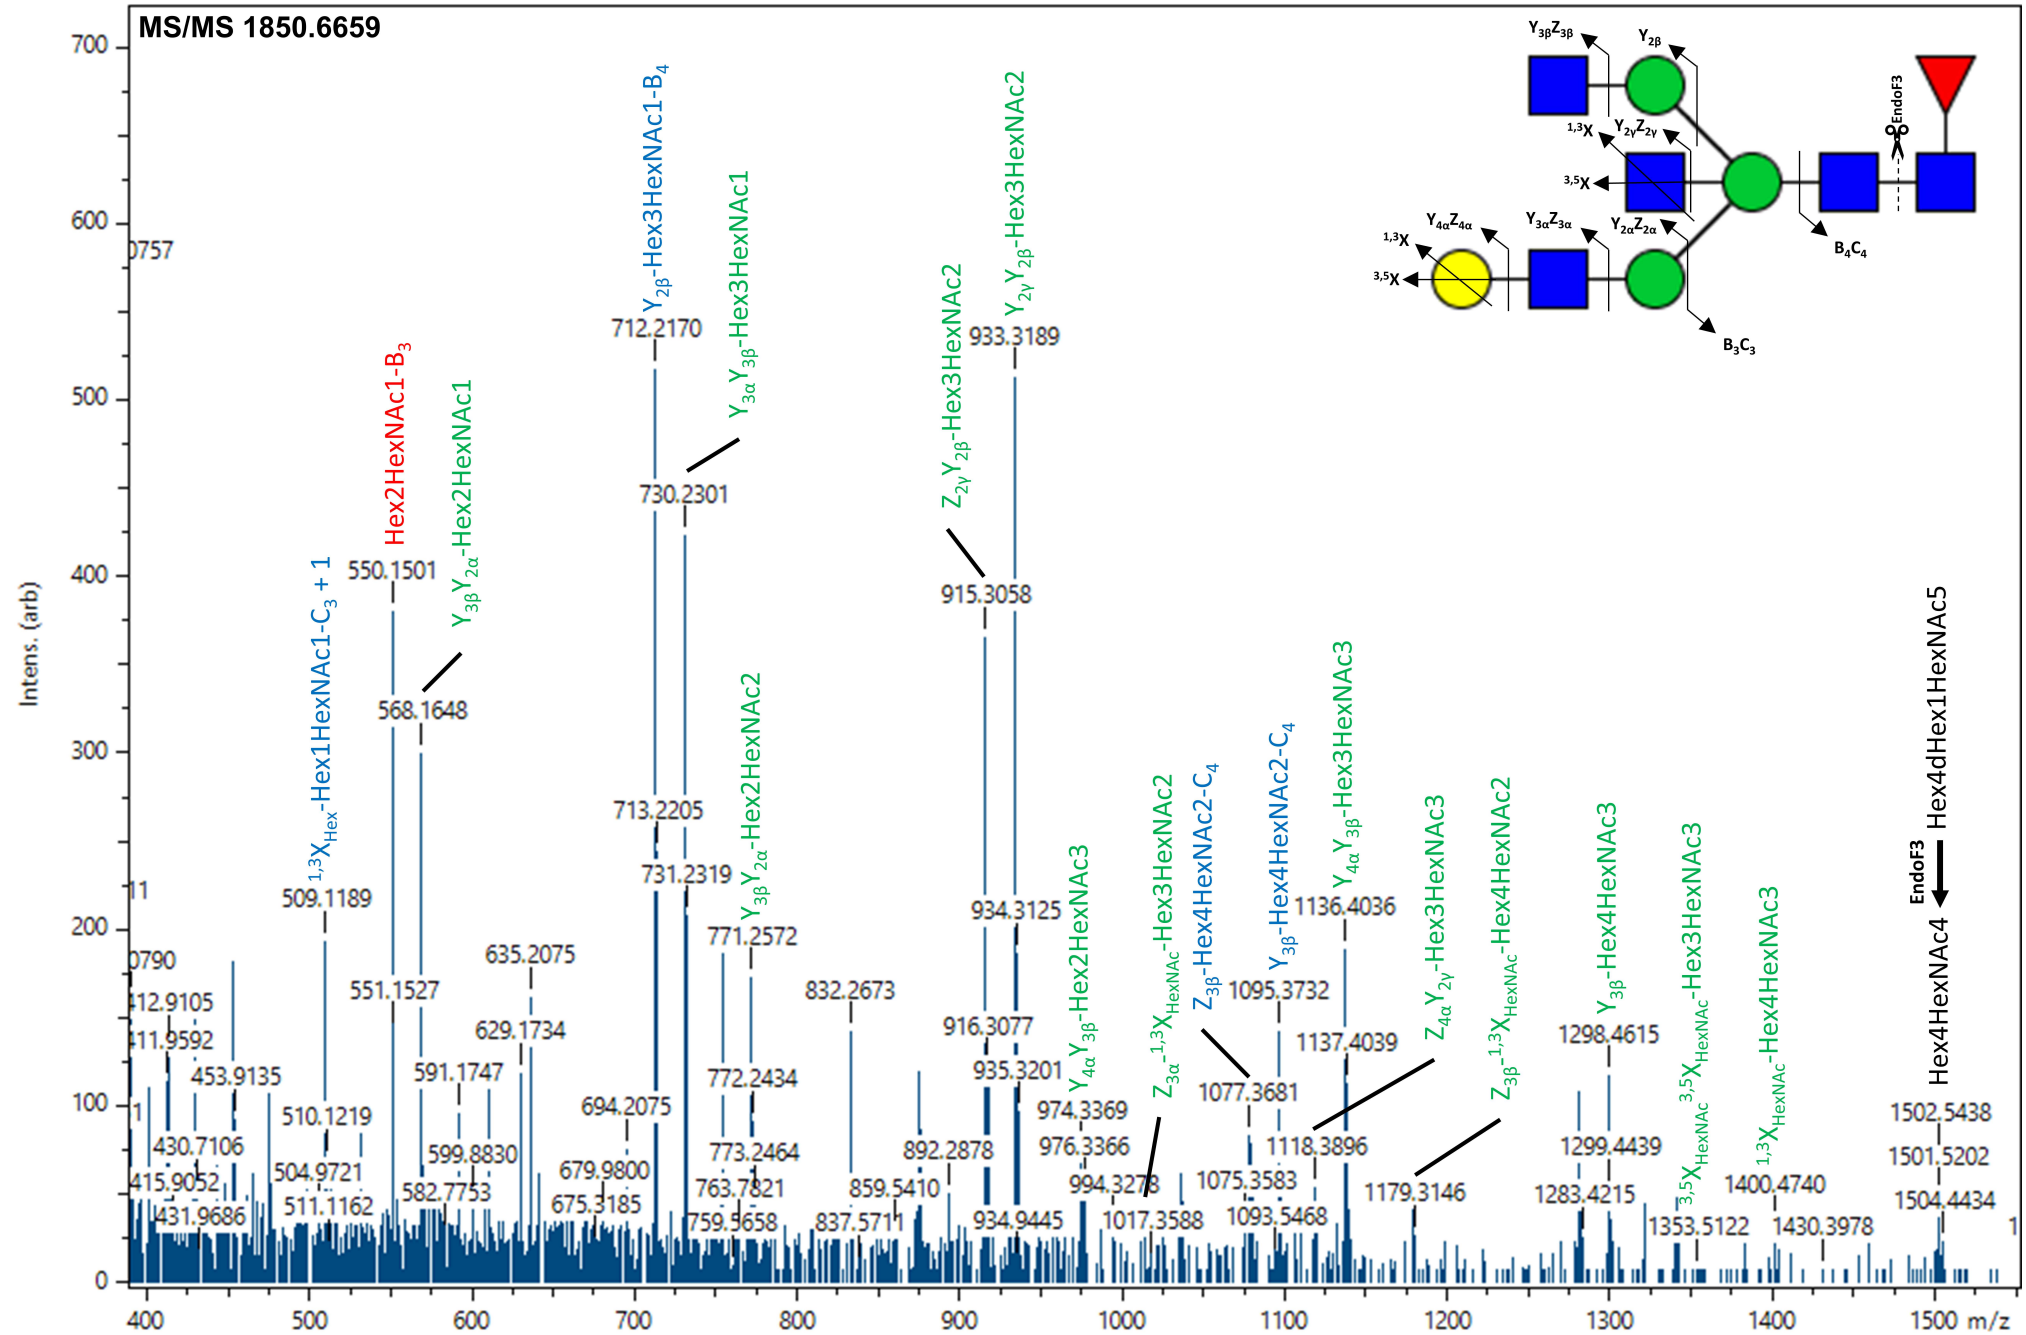

MS/MS 1891.6925

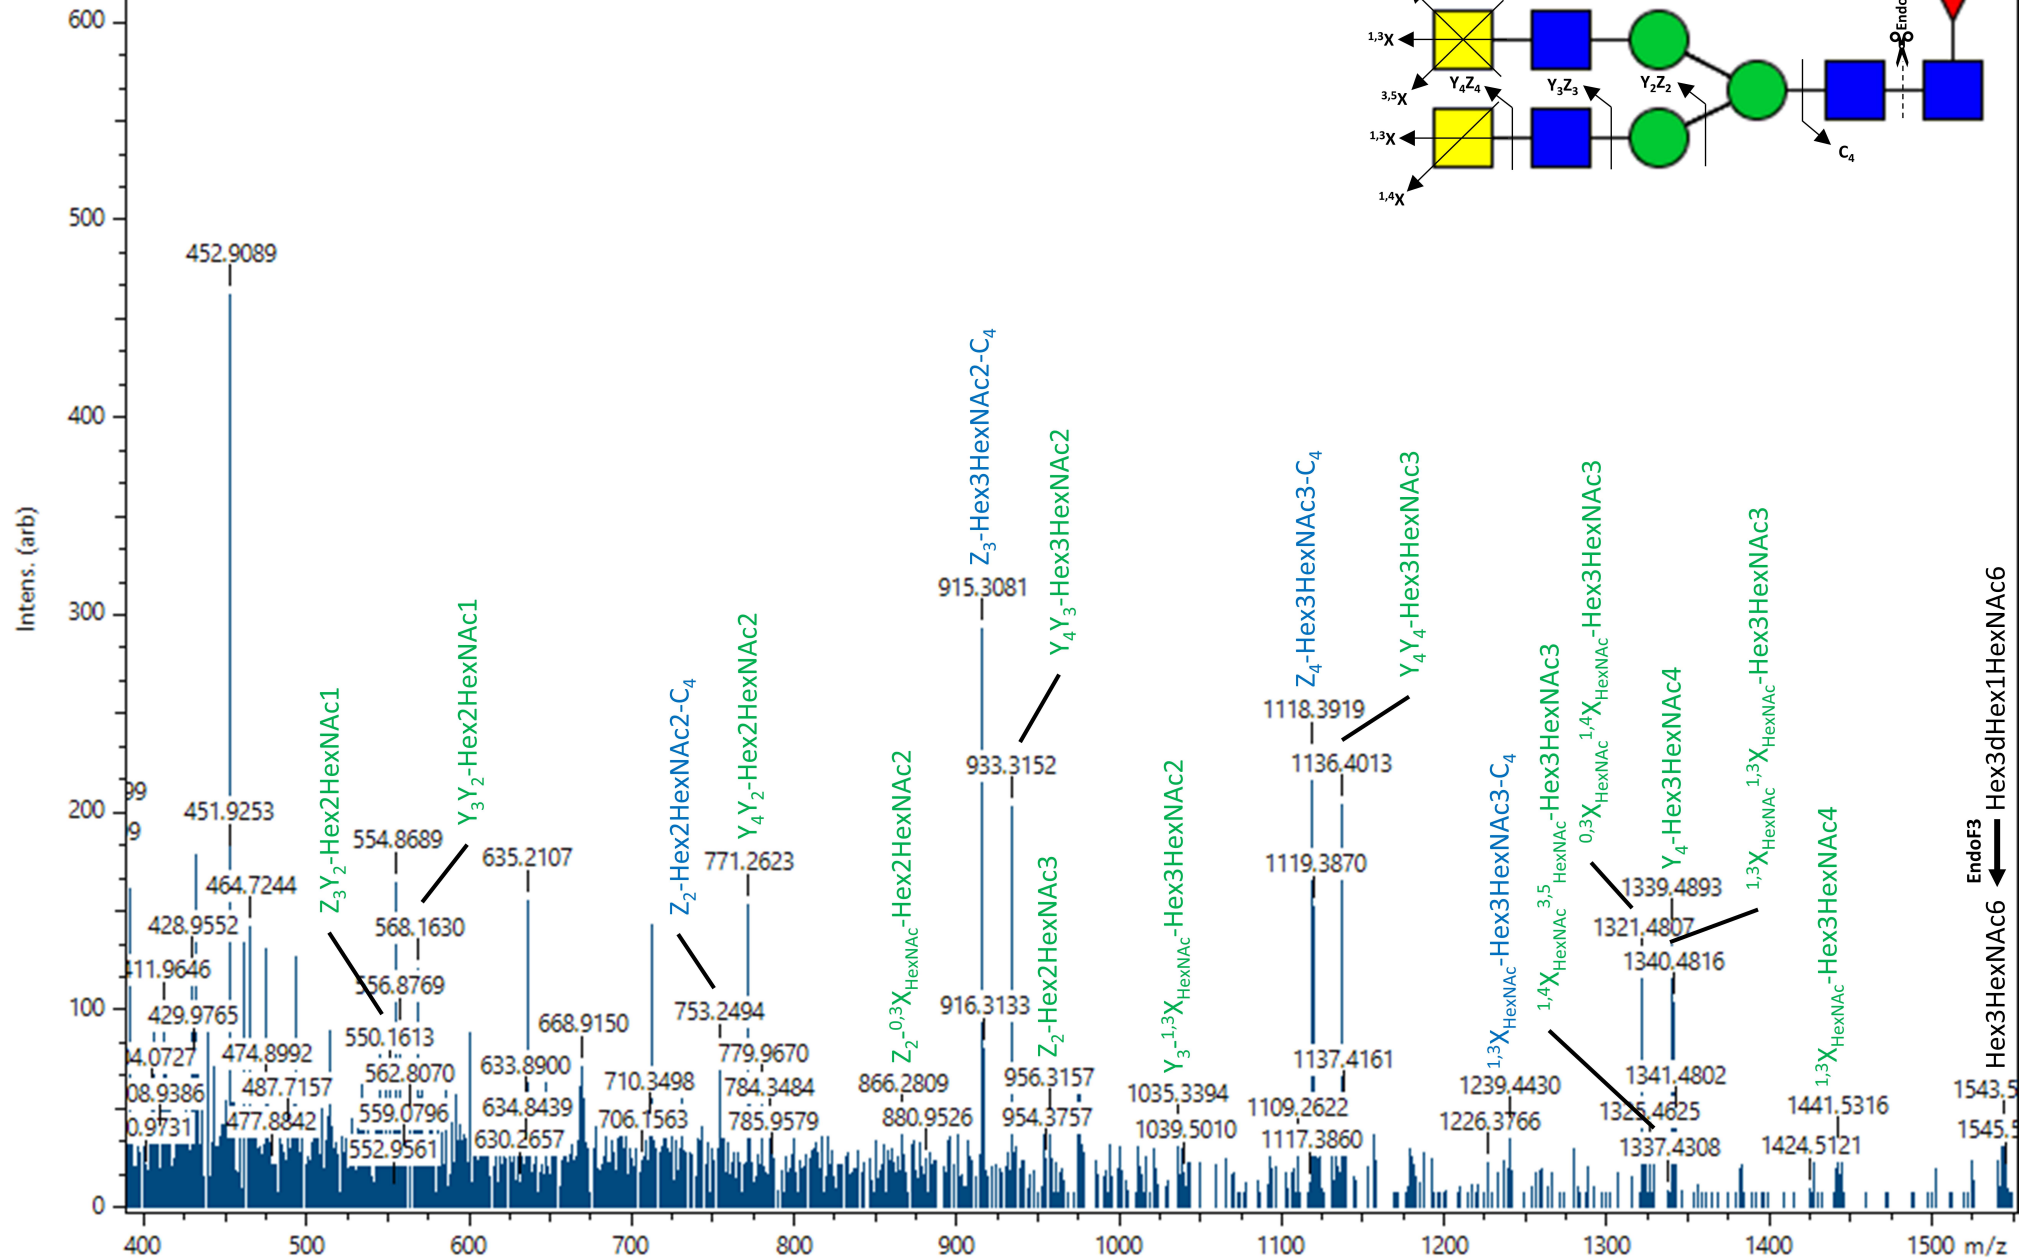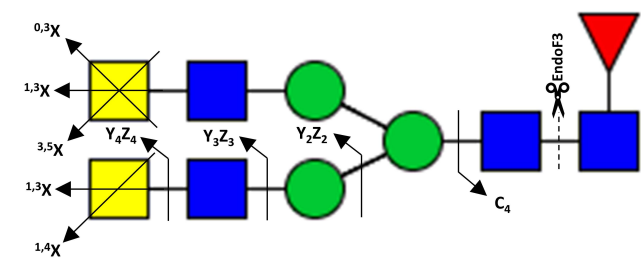



MS/MS 1905.6338

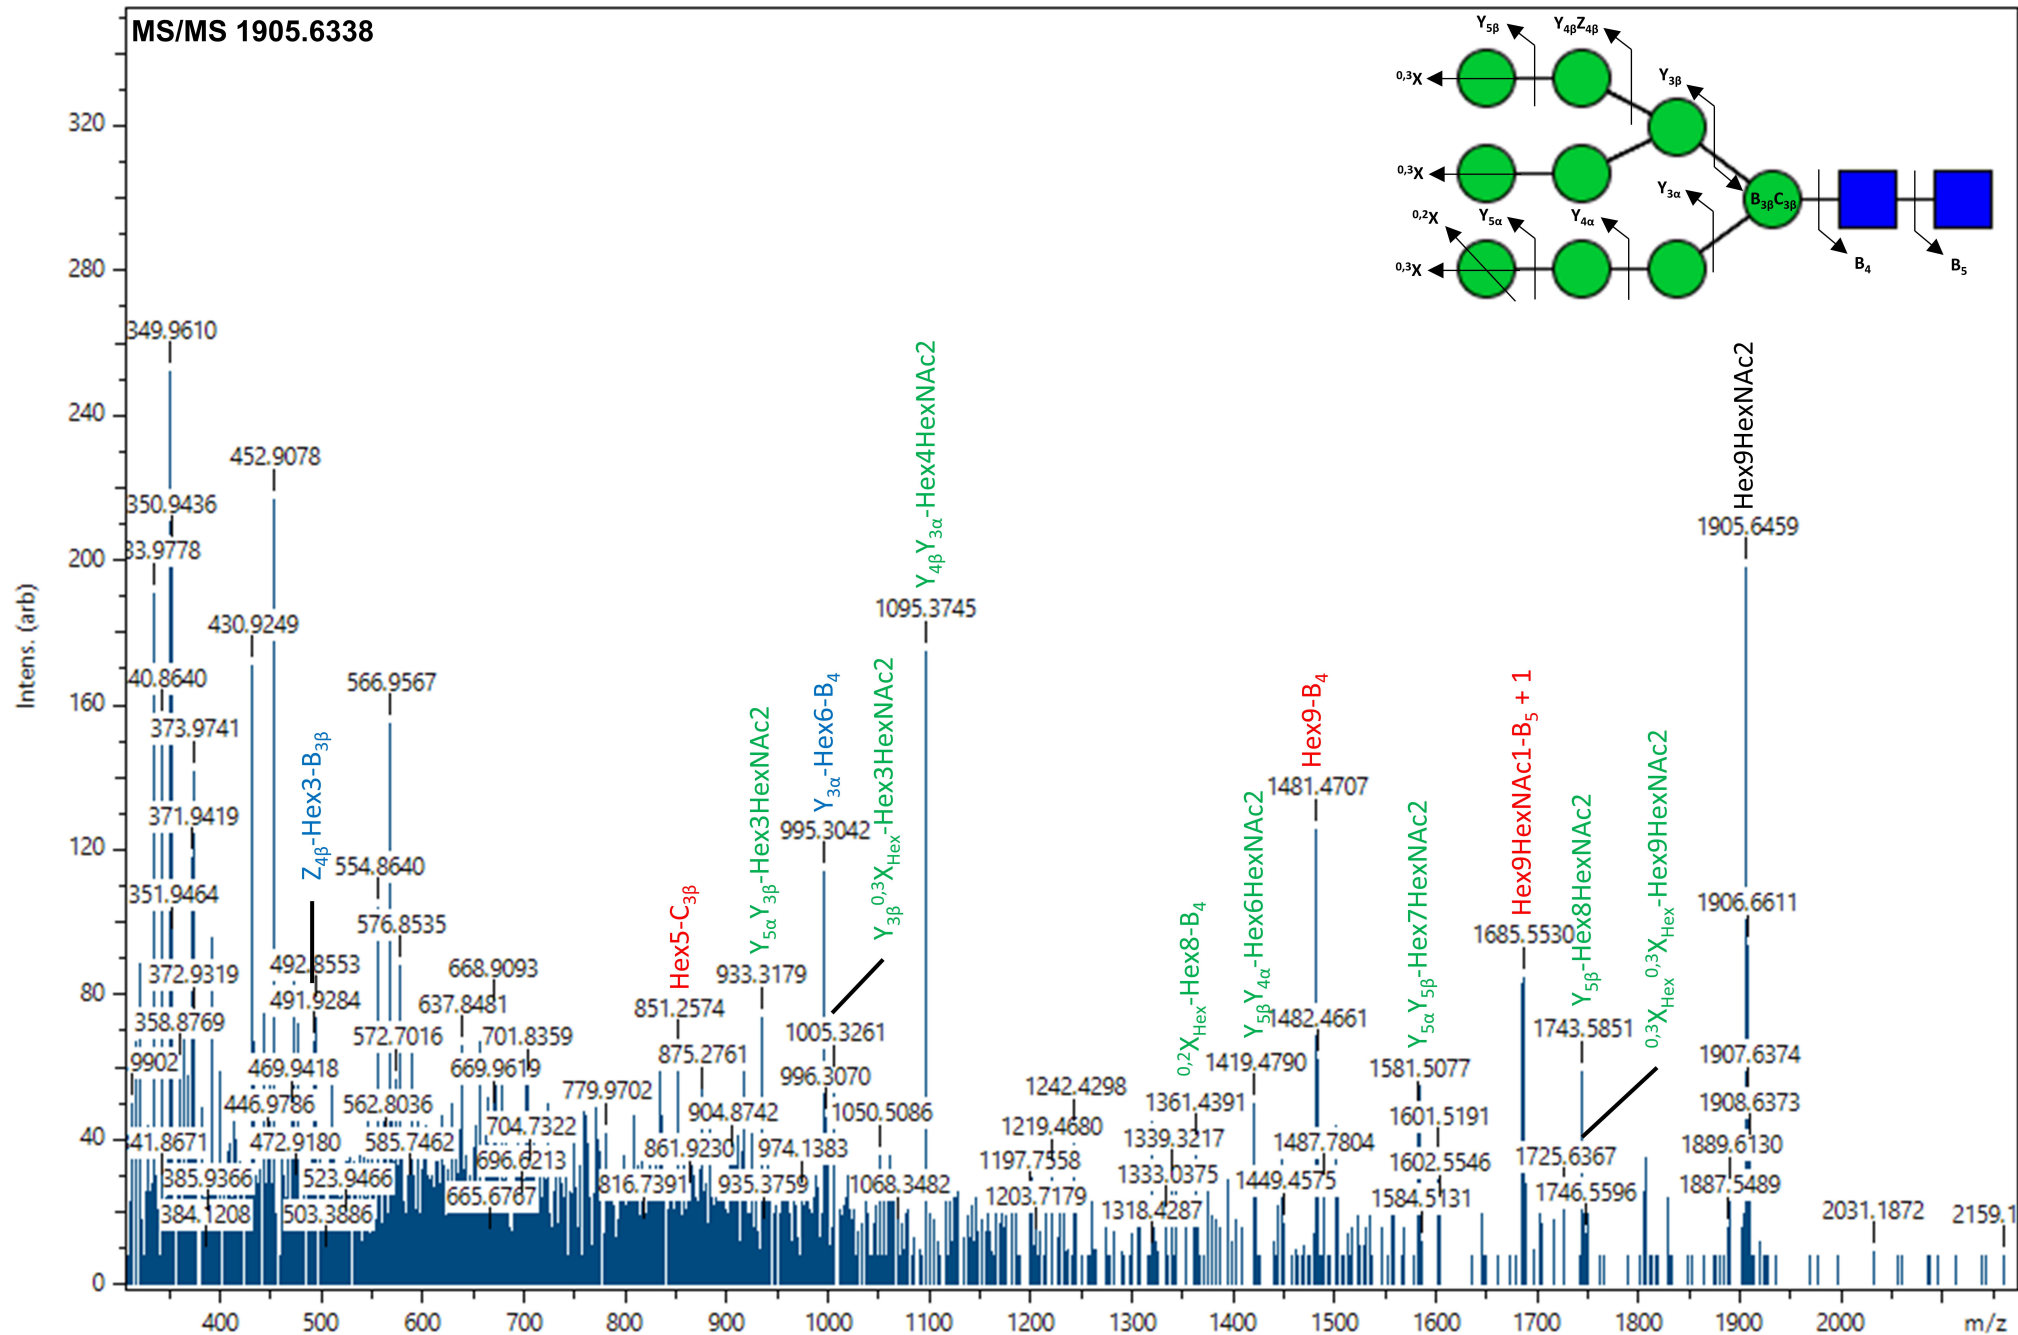

MS/MS 1955.6972

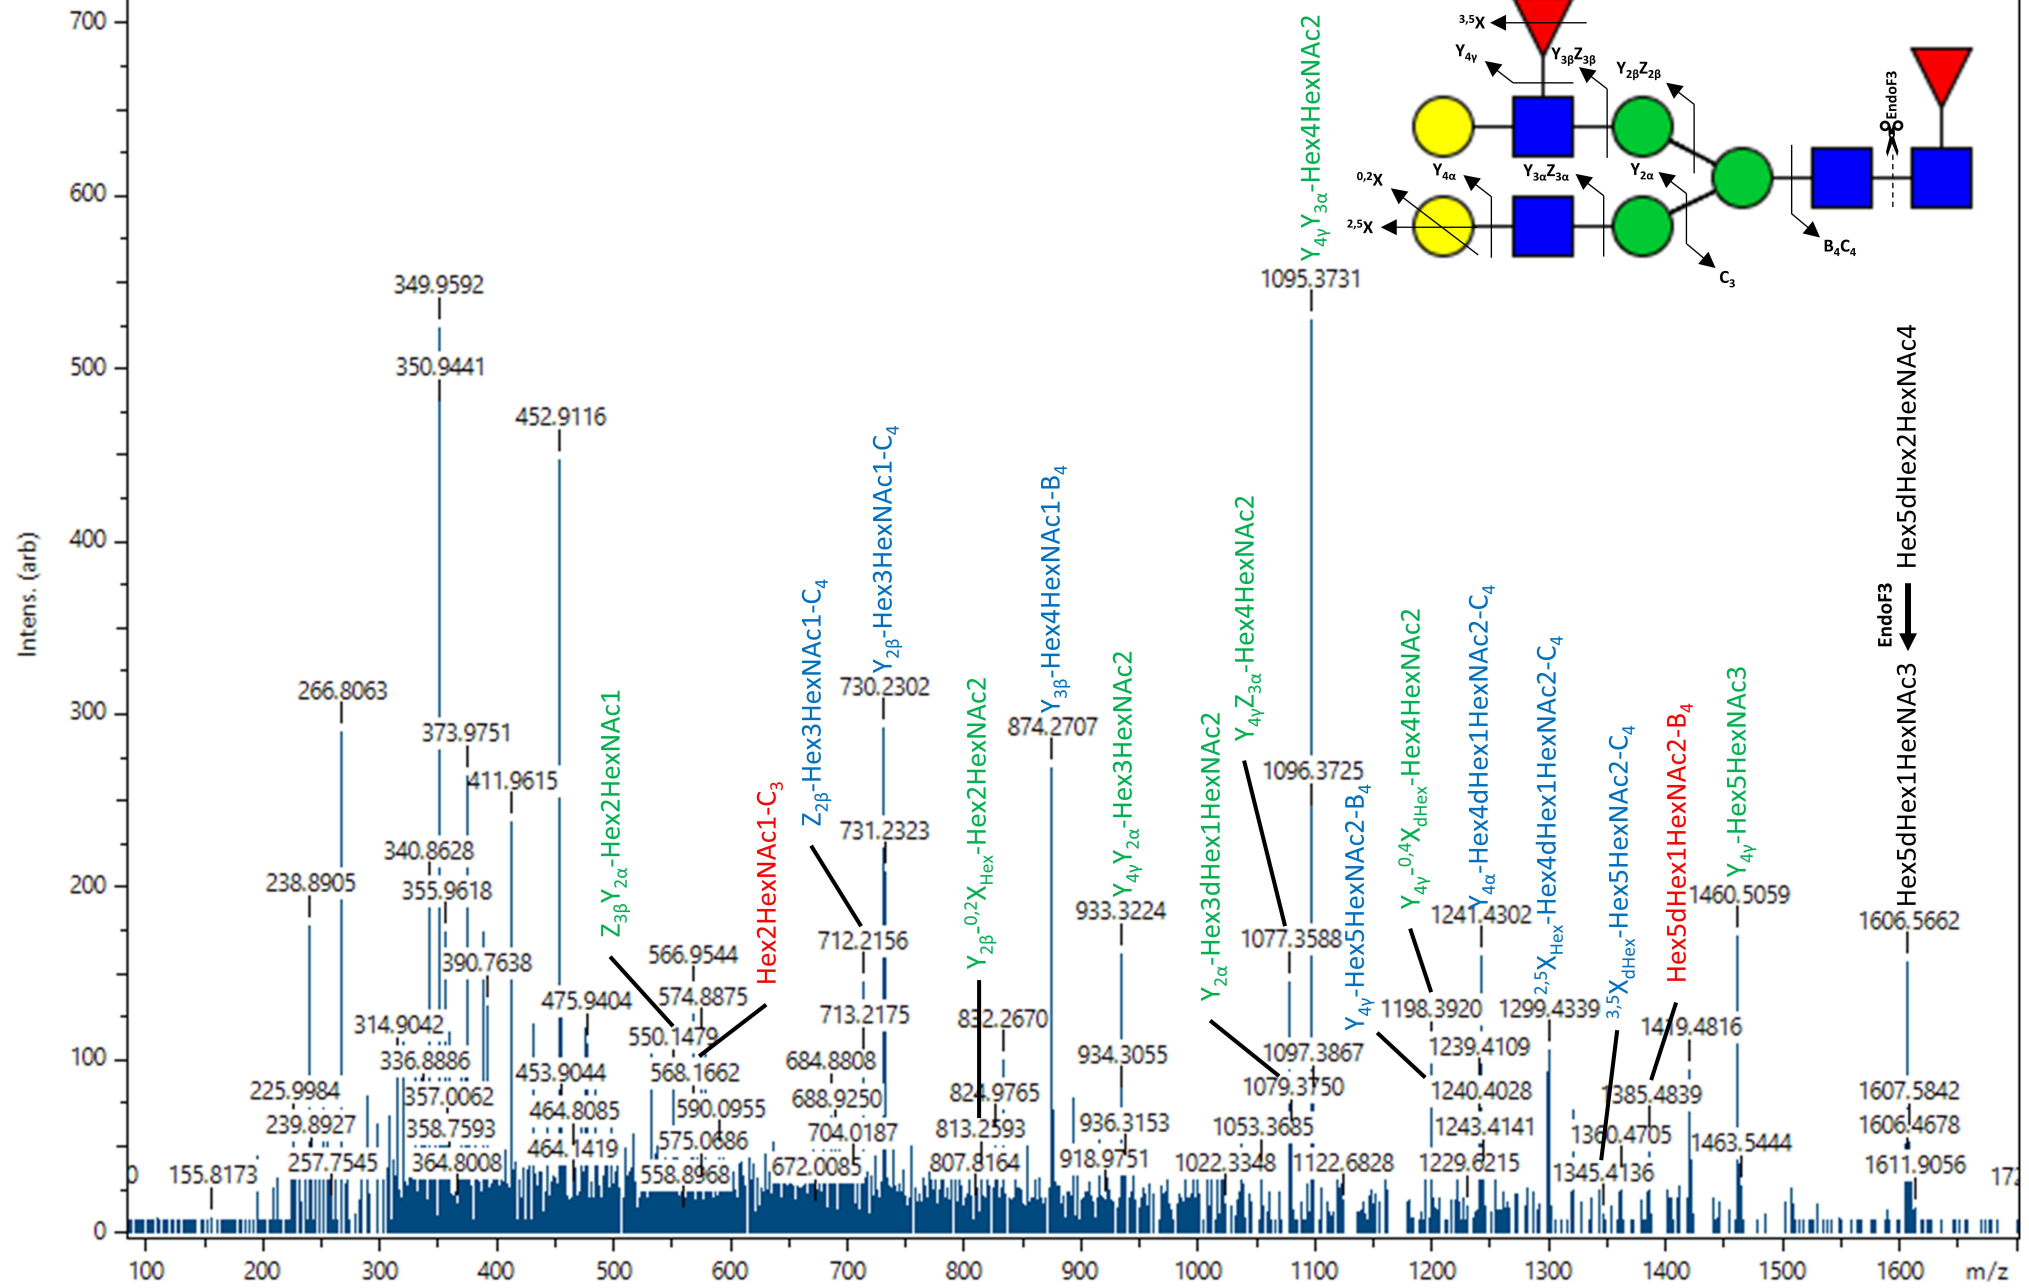

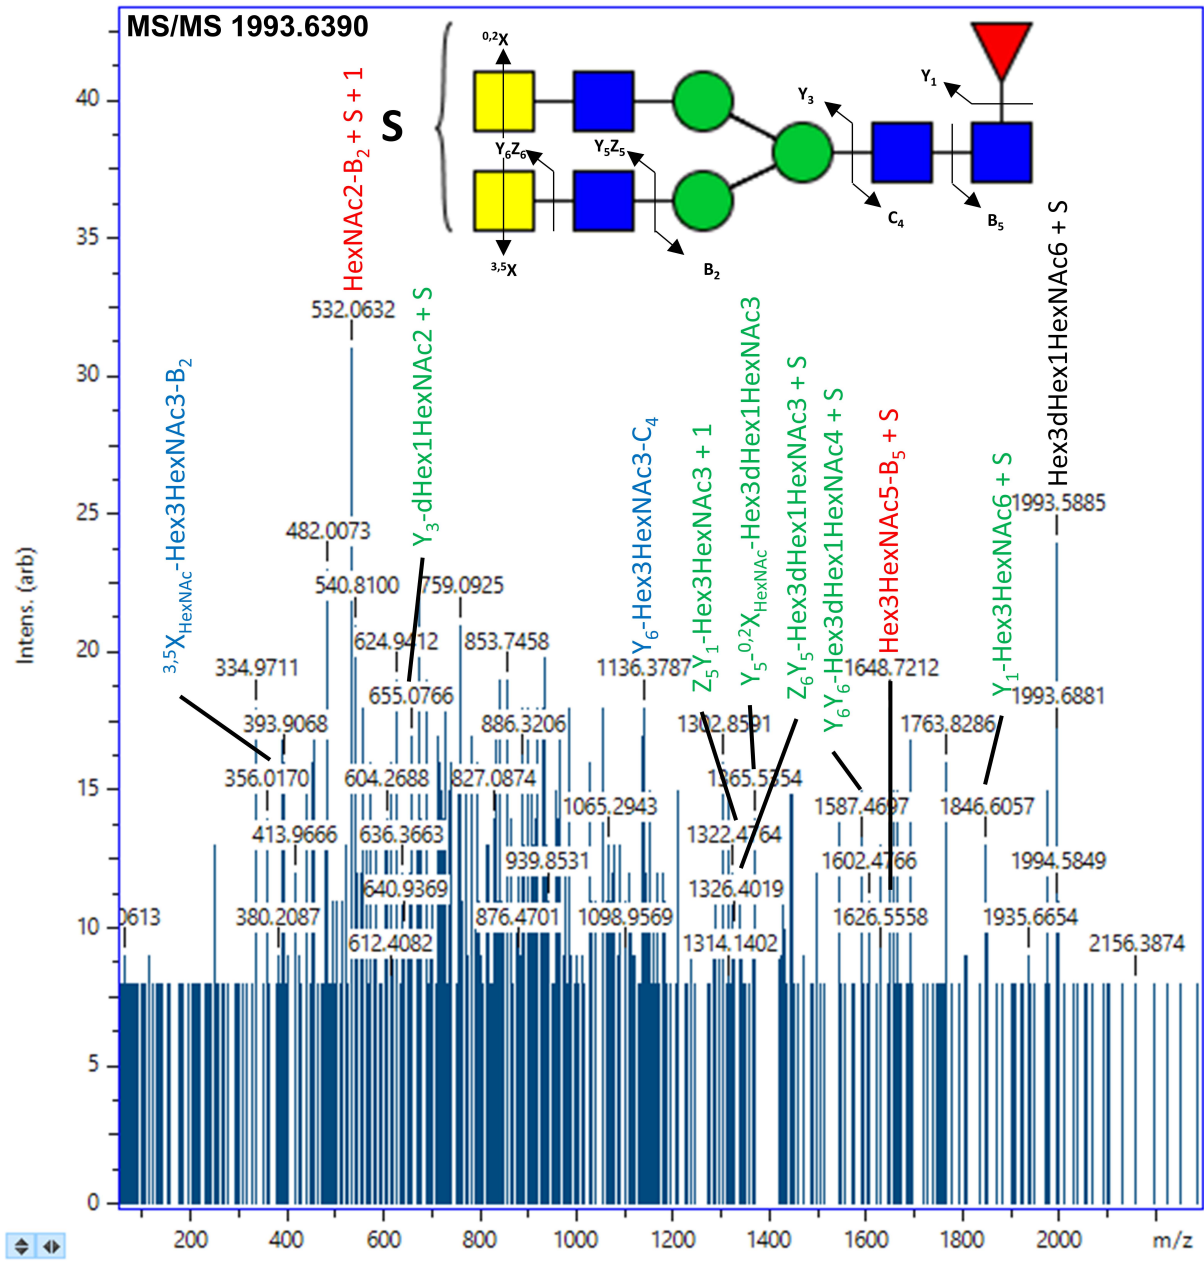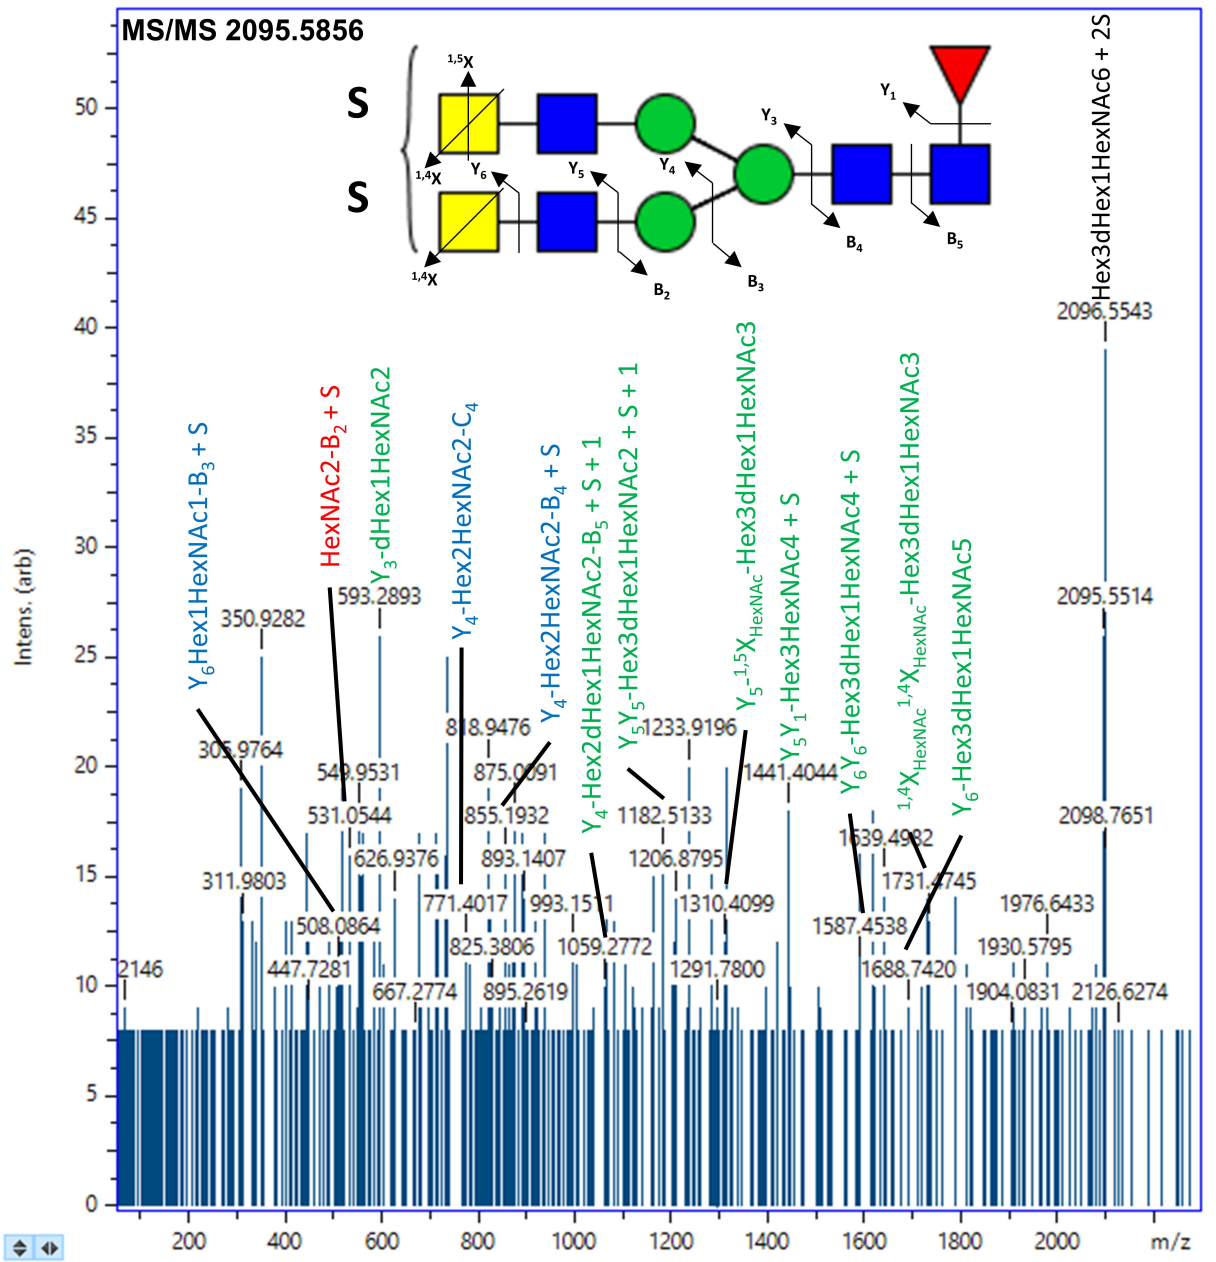

MS/MS 2012.7187

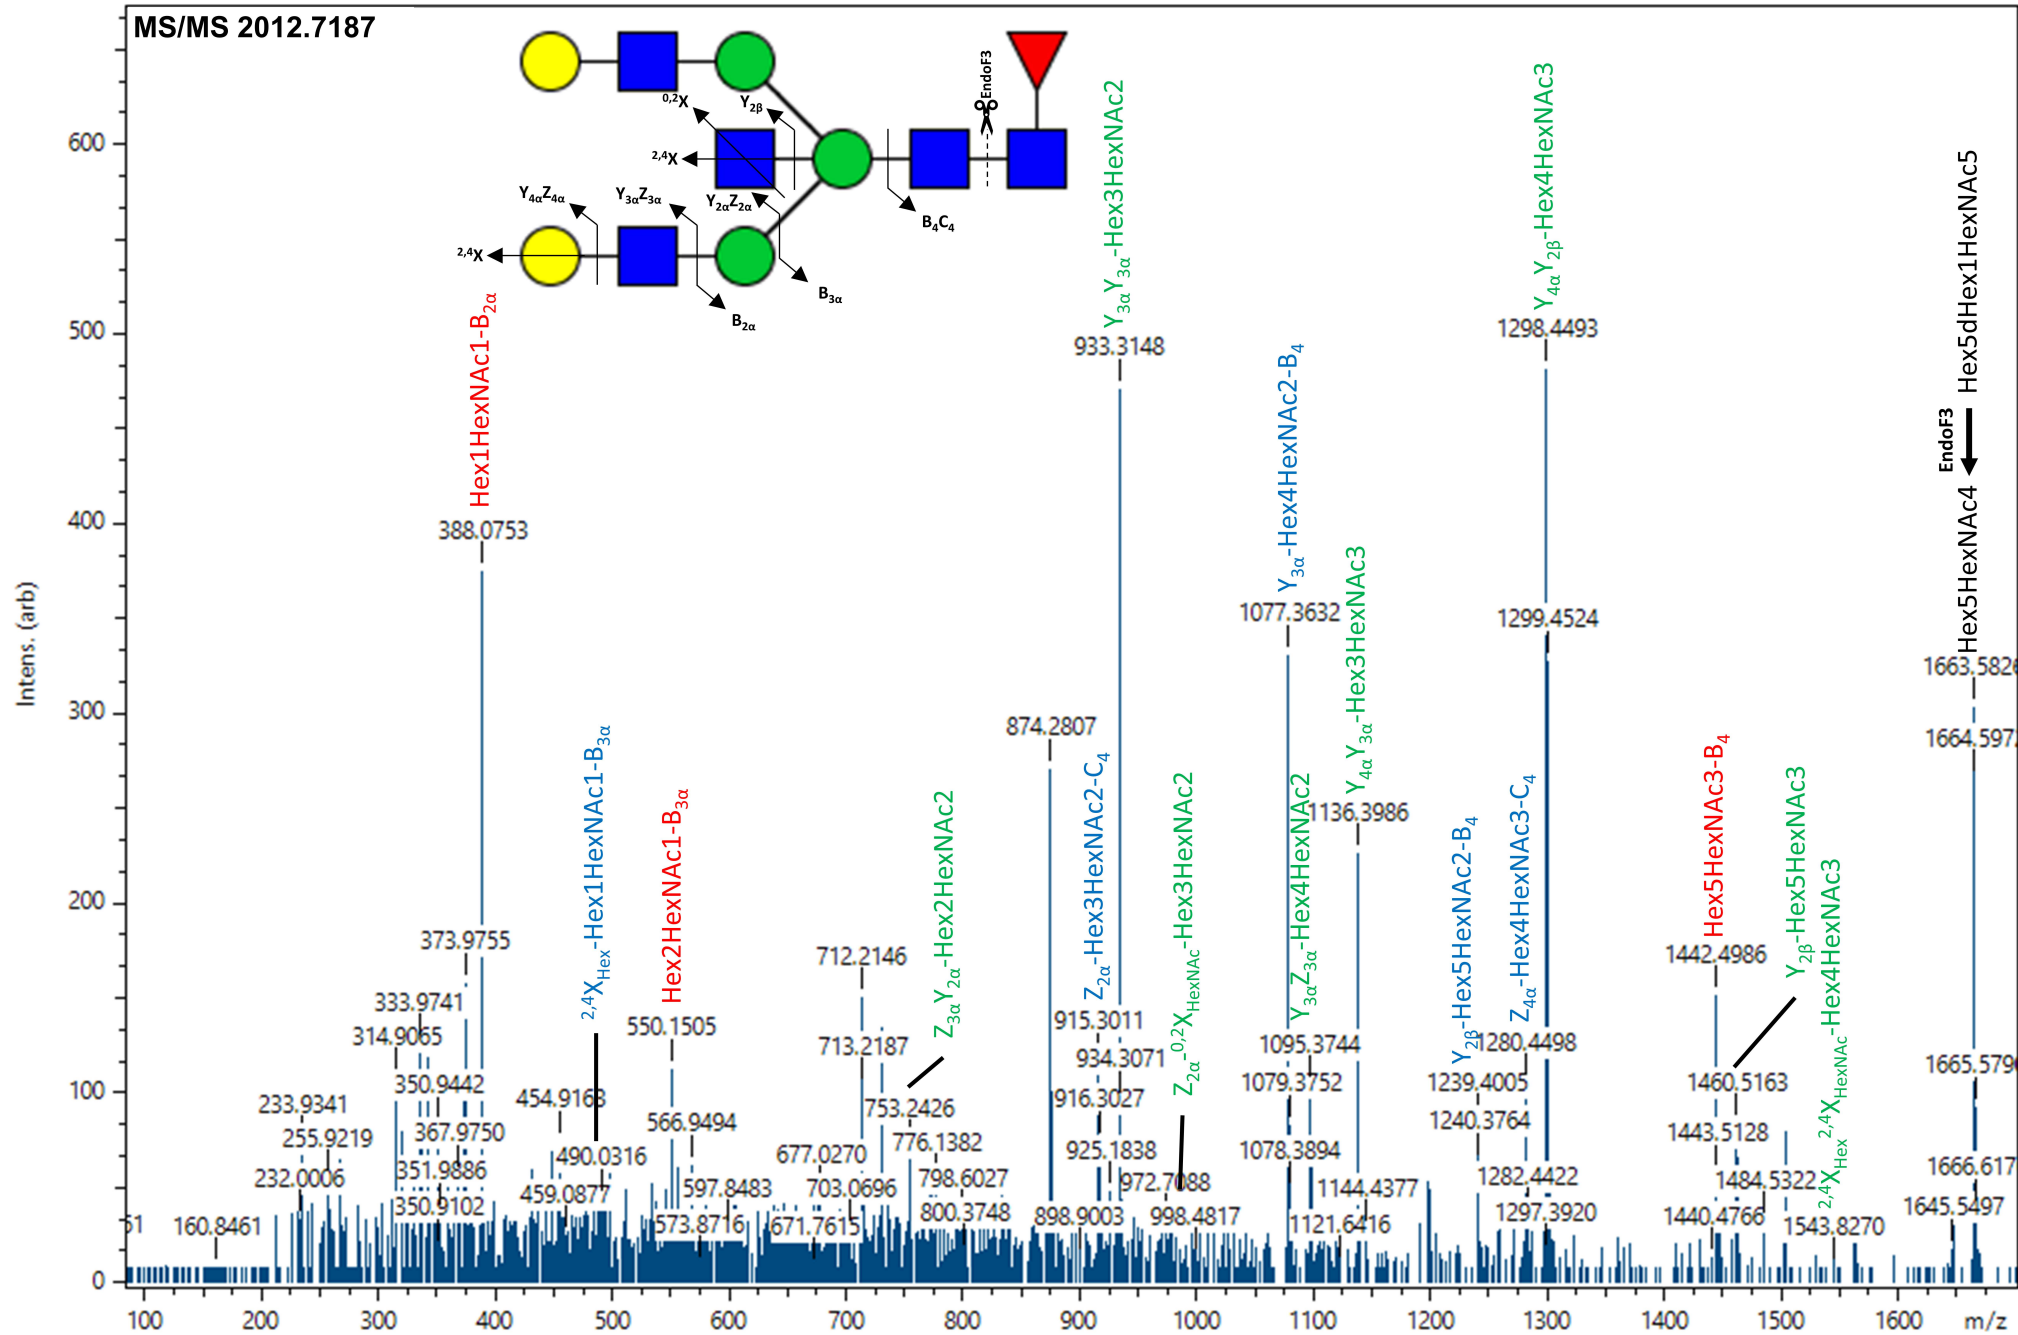

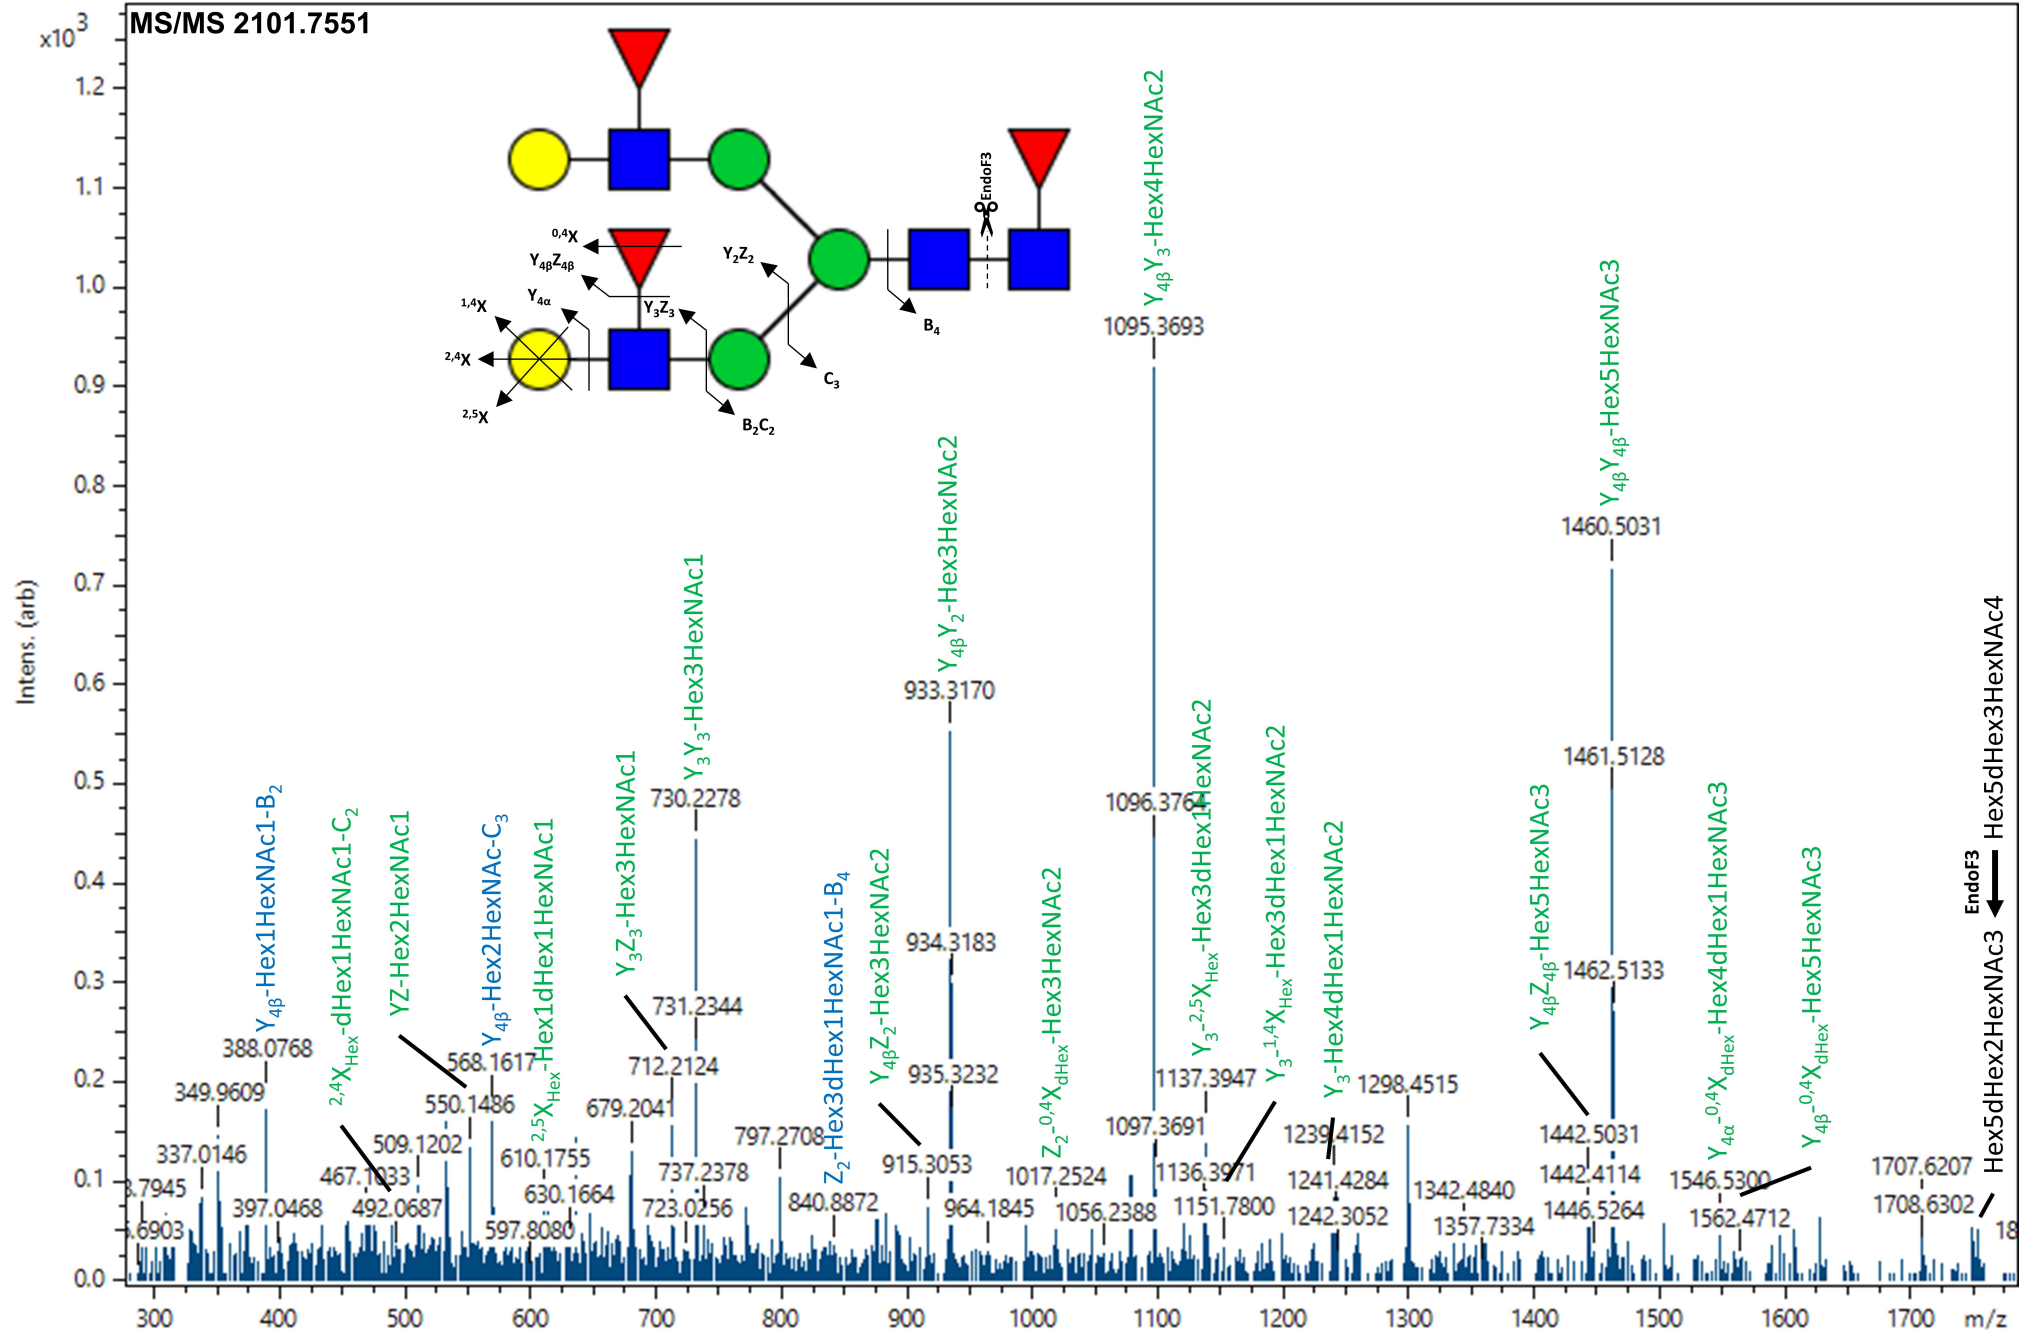

MS/MS 2174.7715

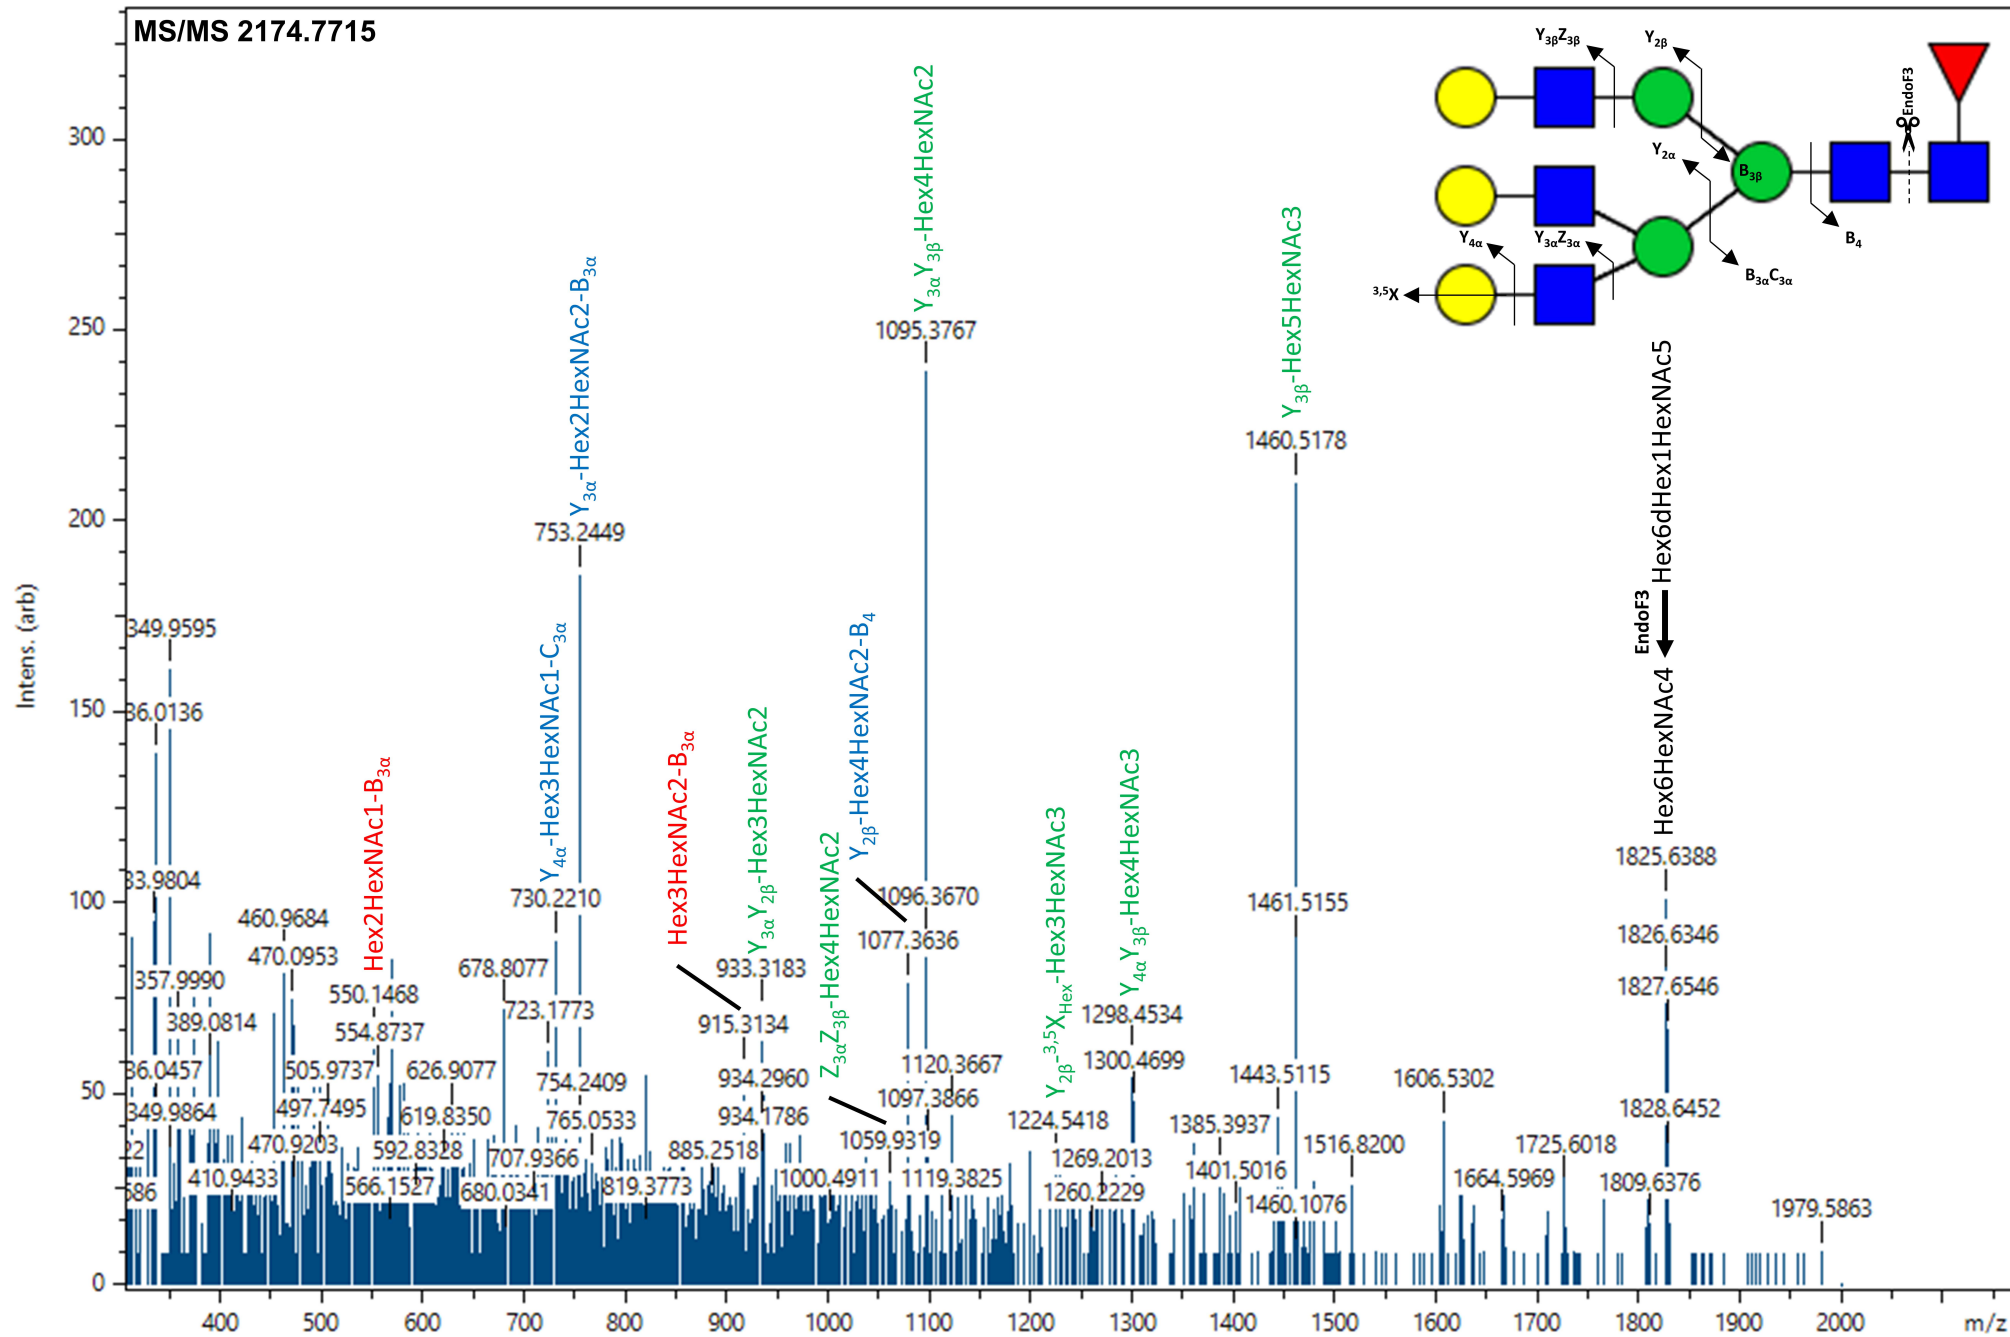

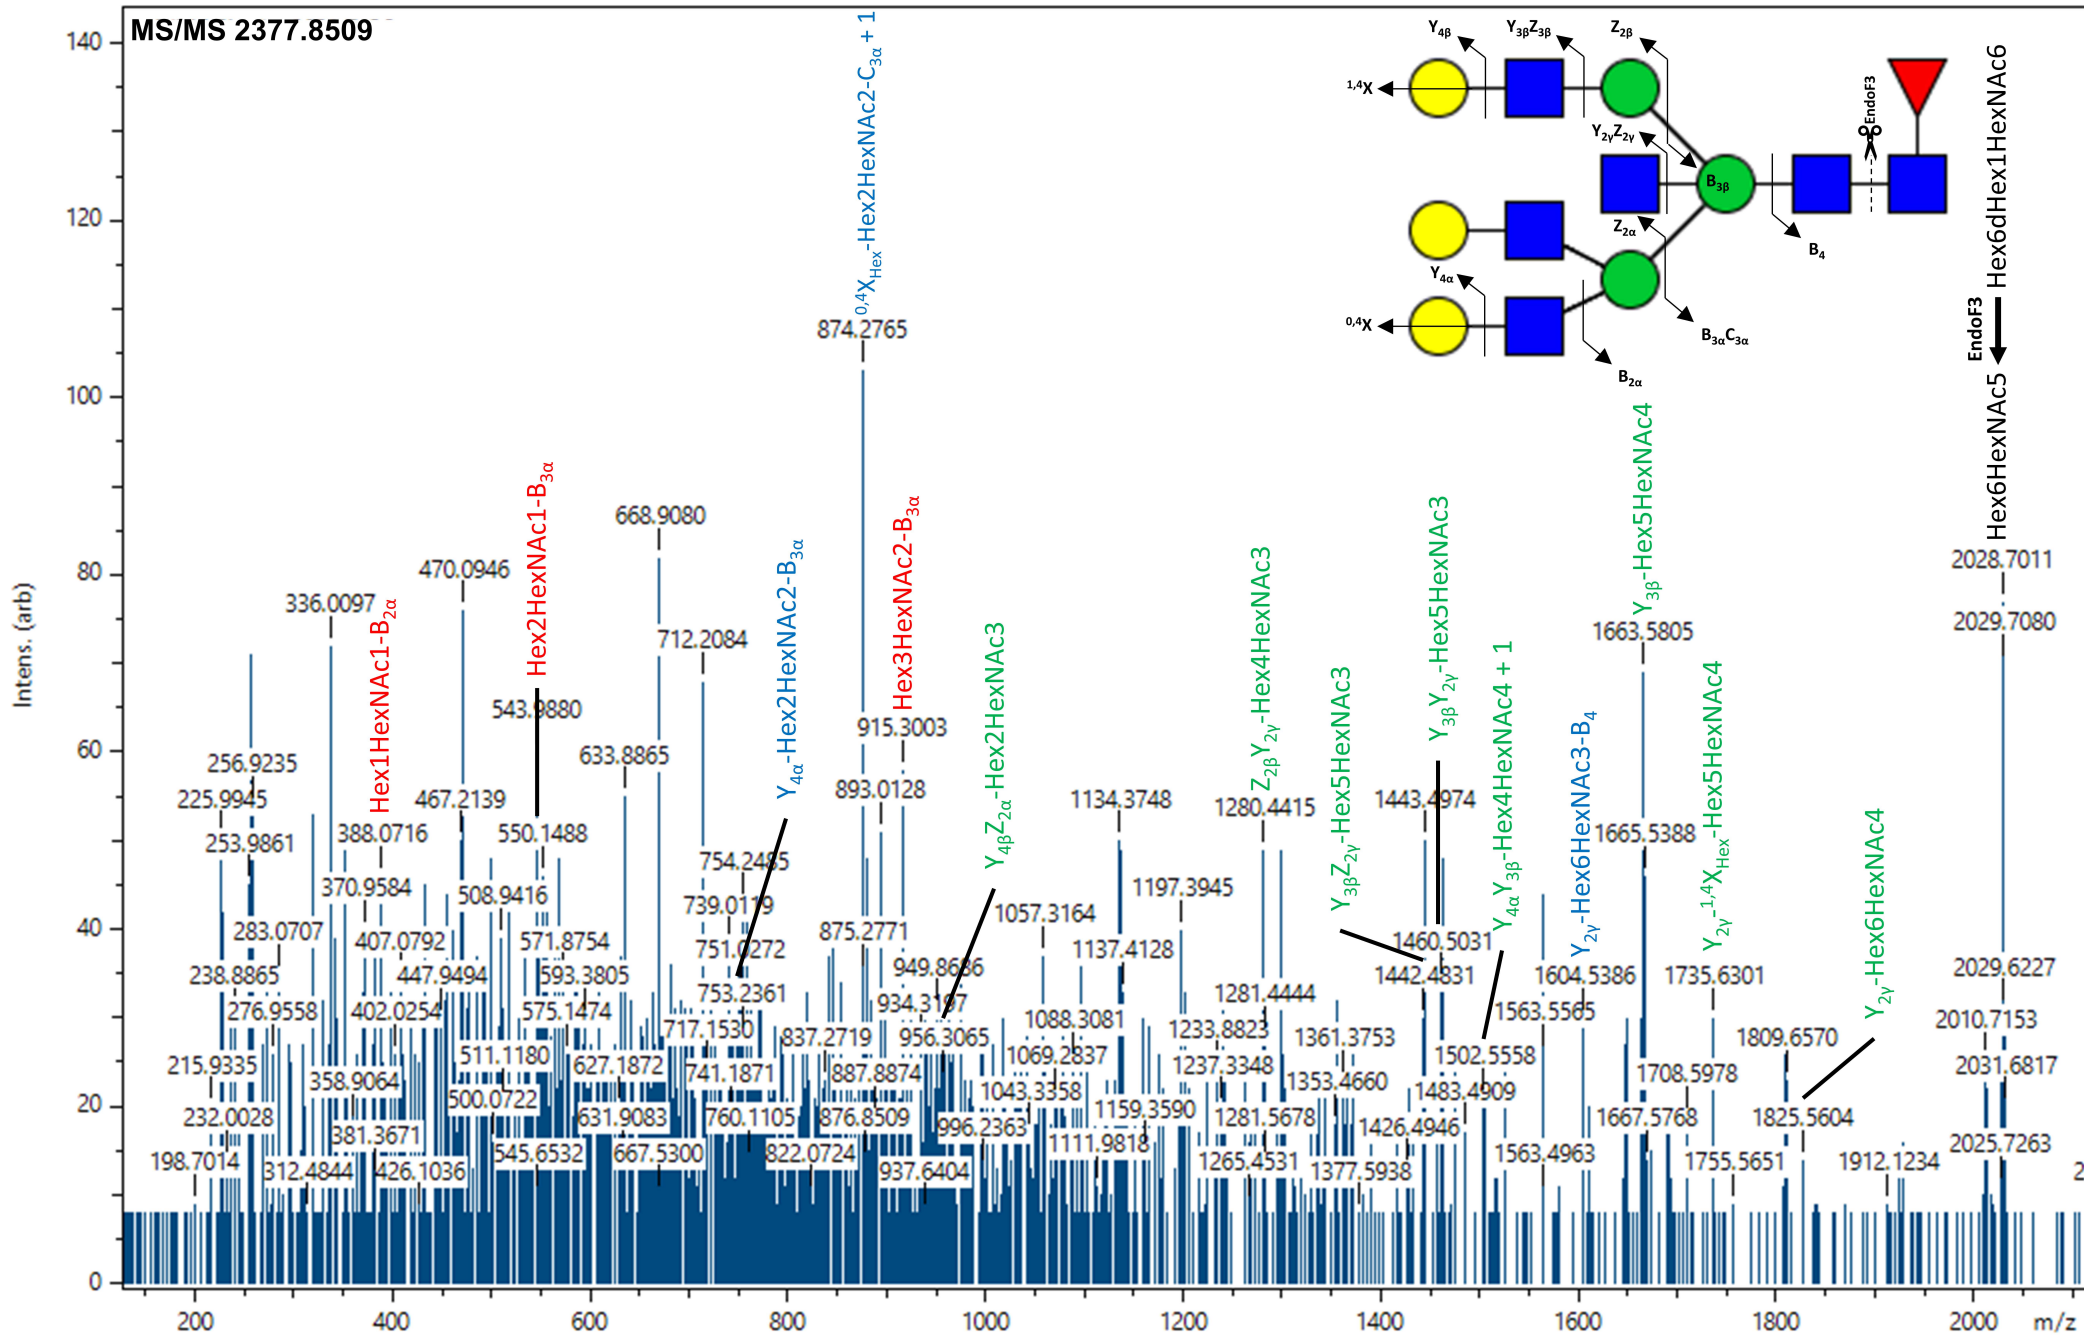

MS/MS 2523.9088

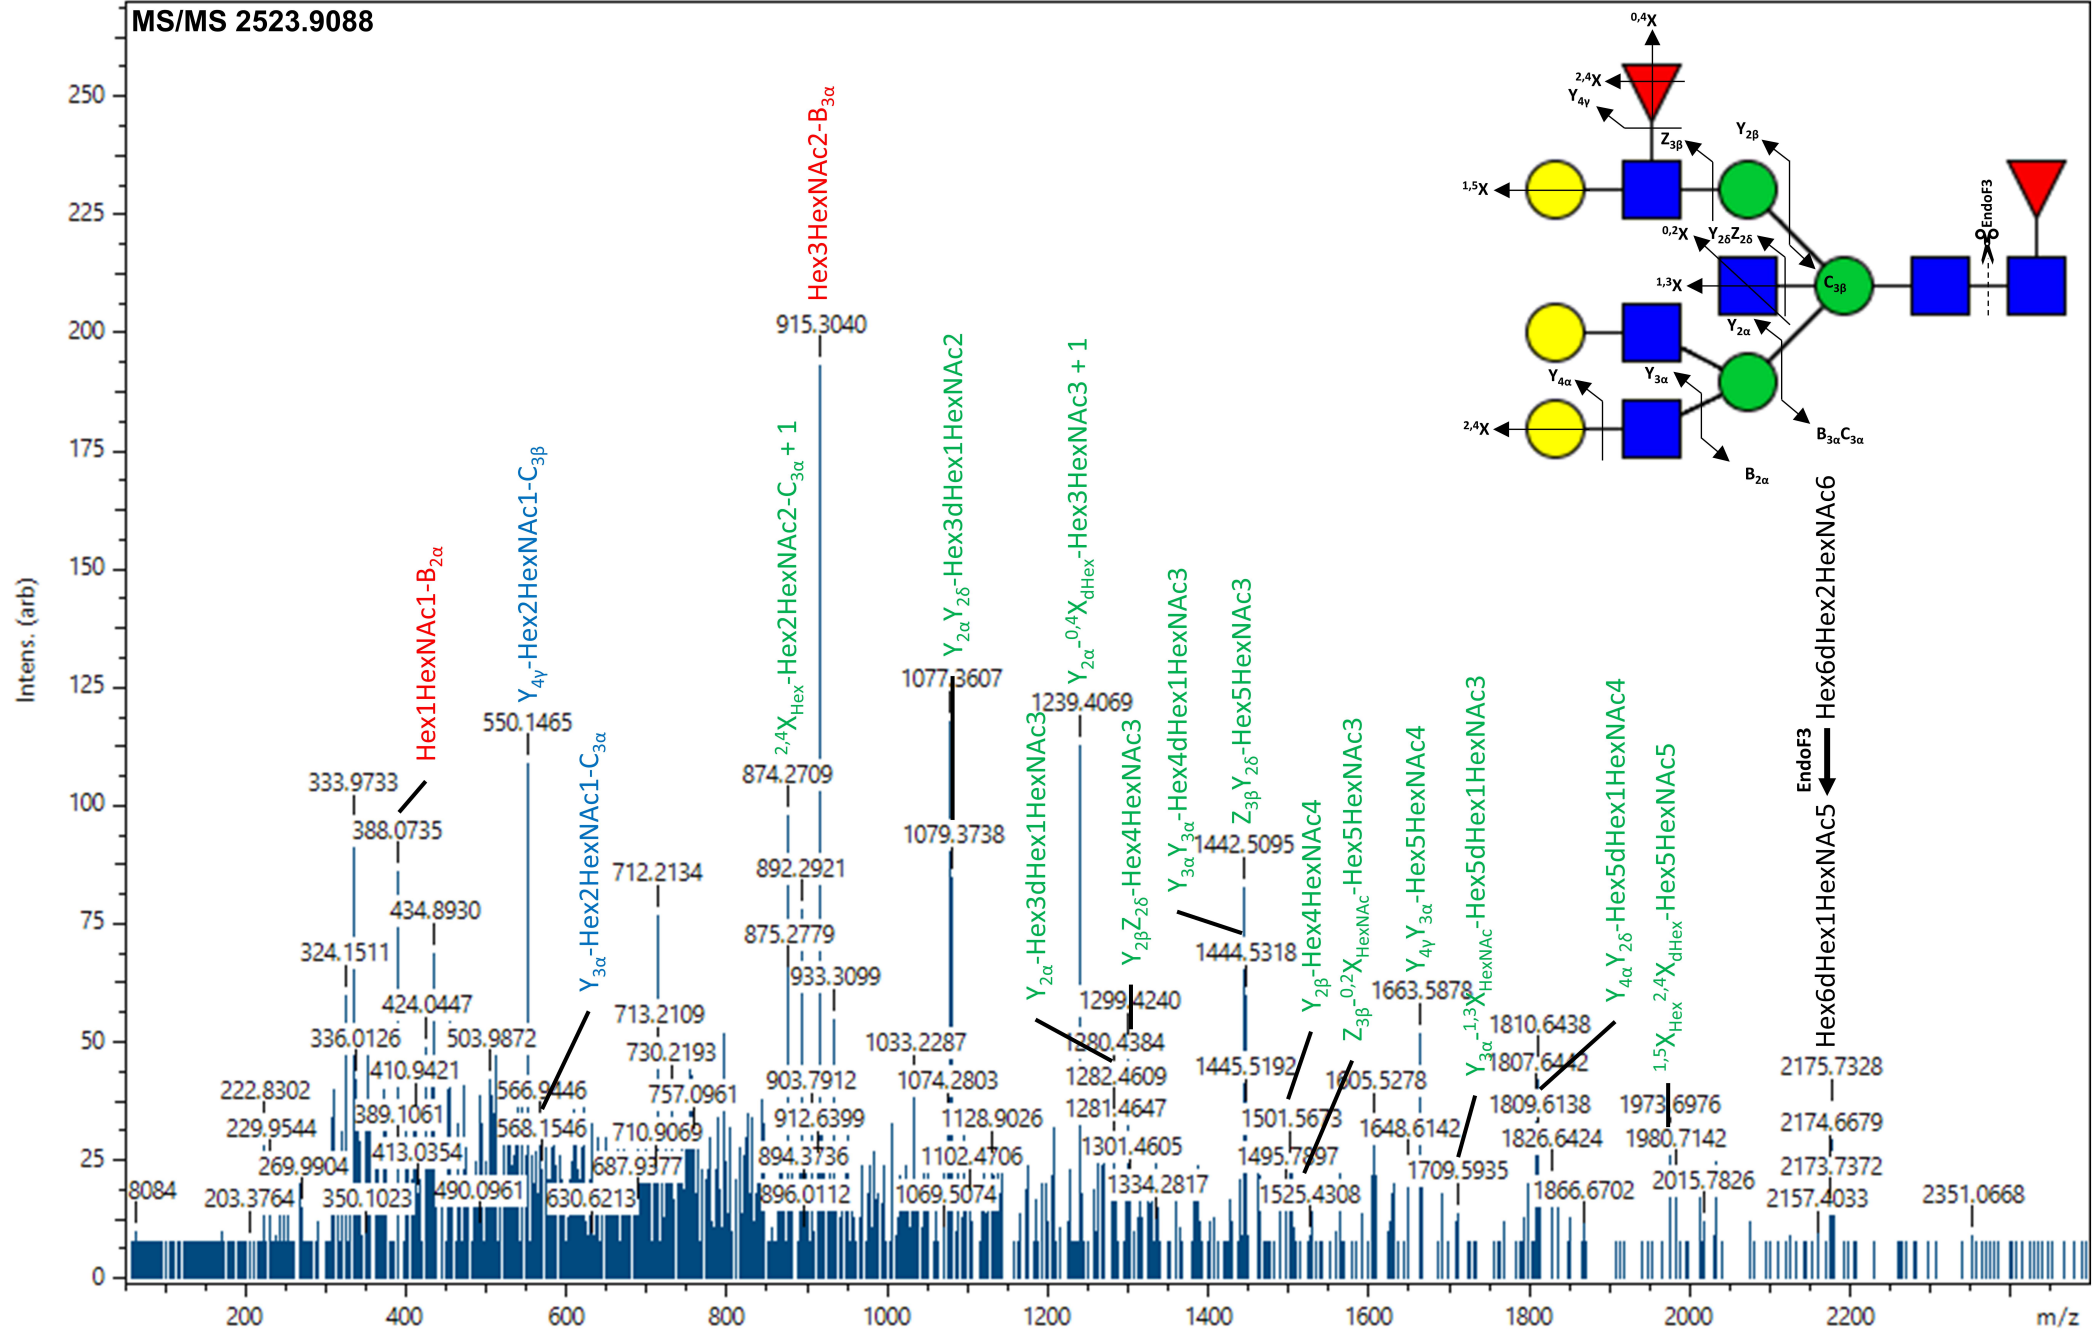



MS/MS 2539.9037

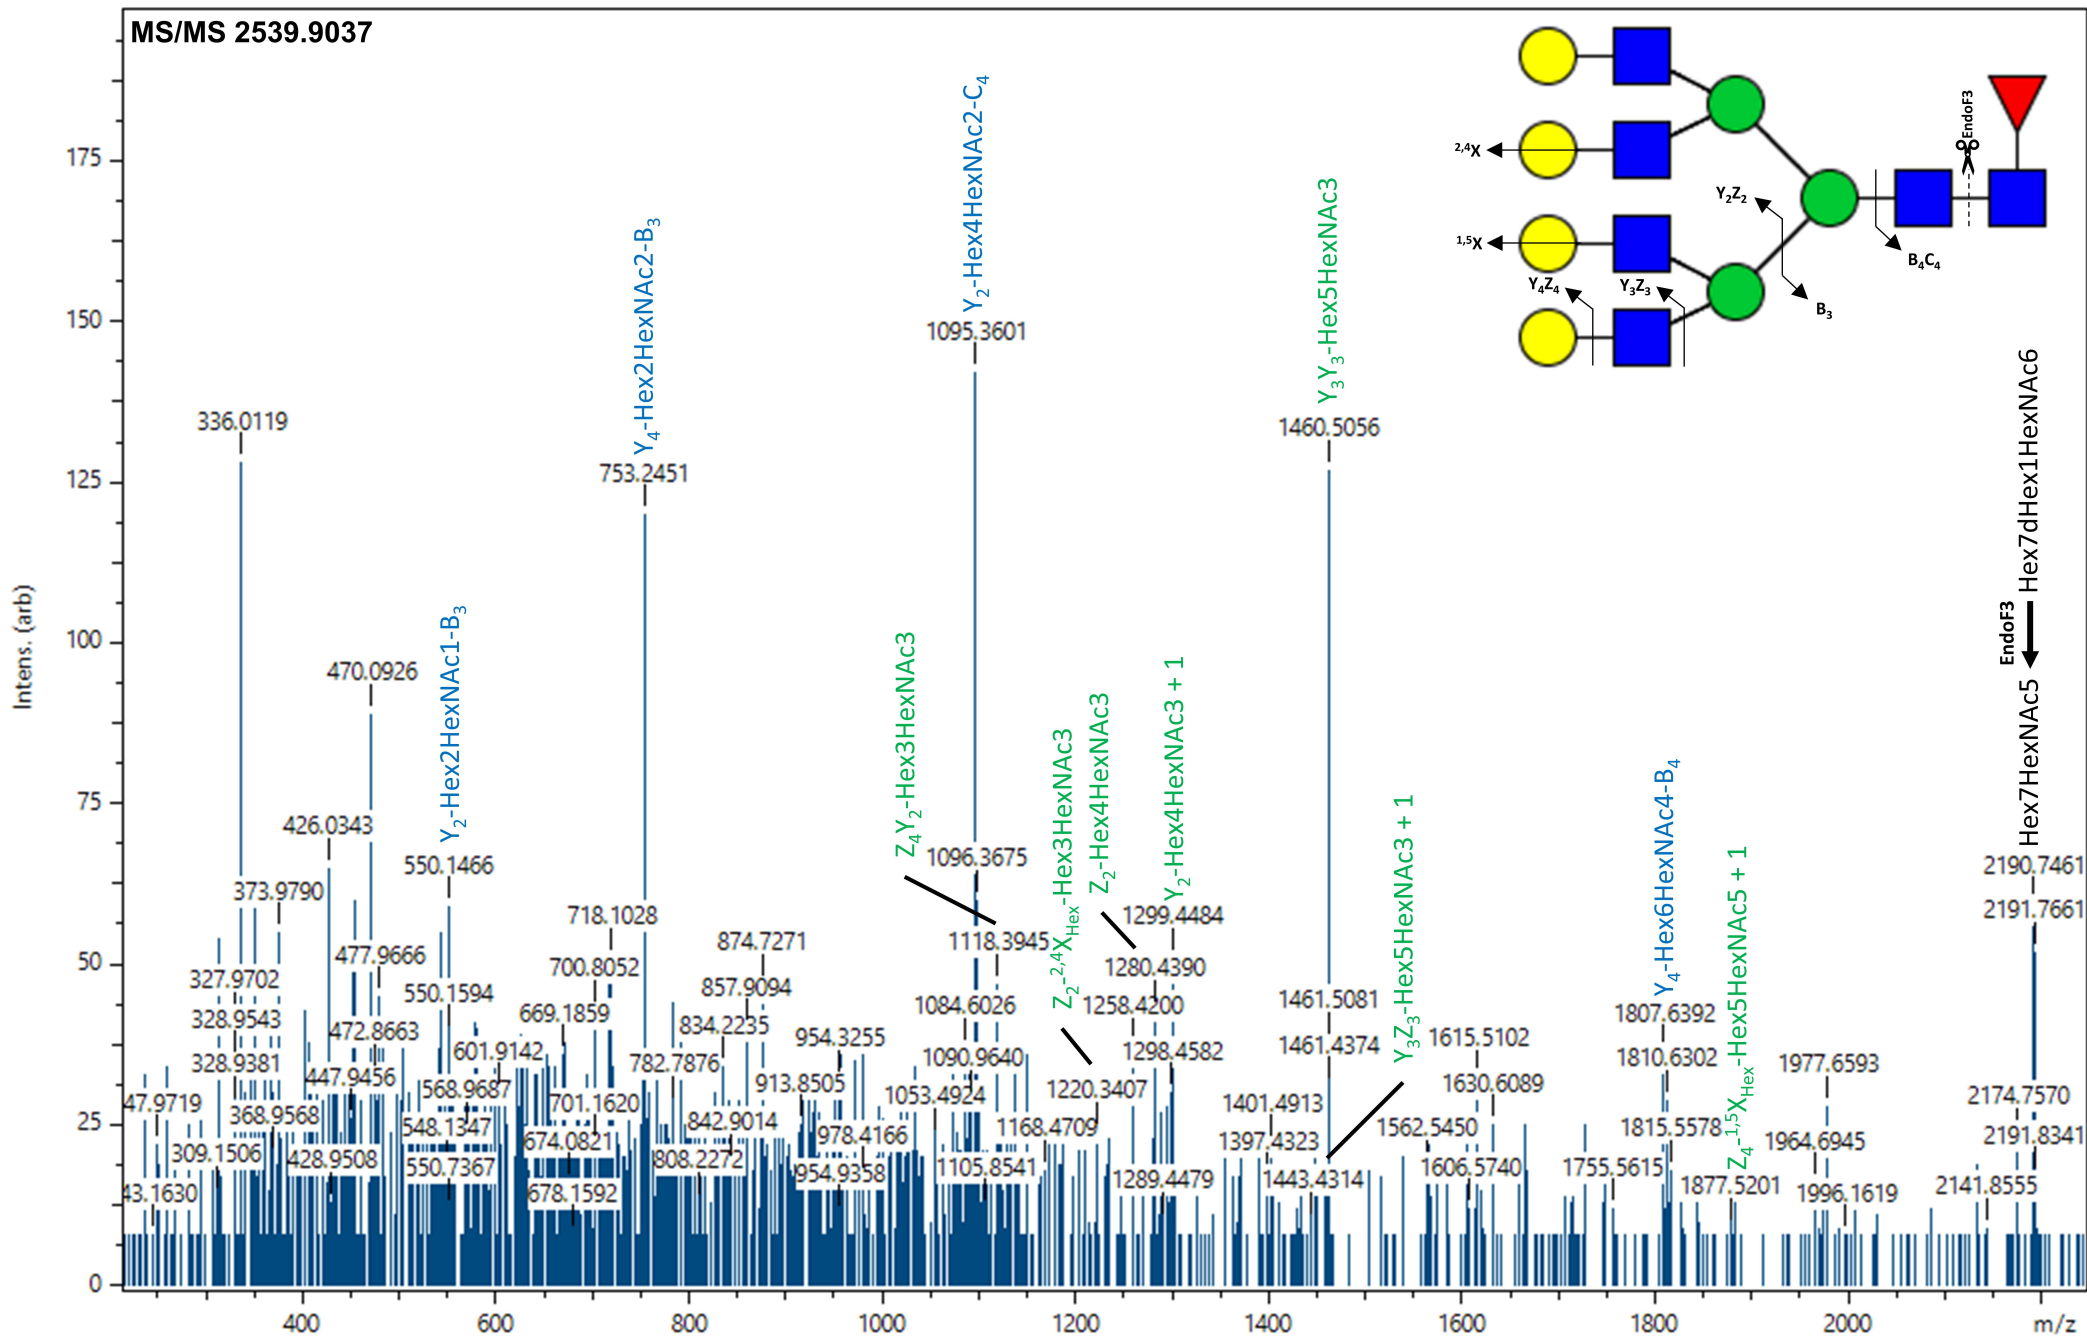

MS/MS 2742.9831

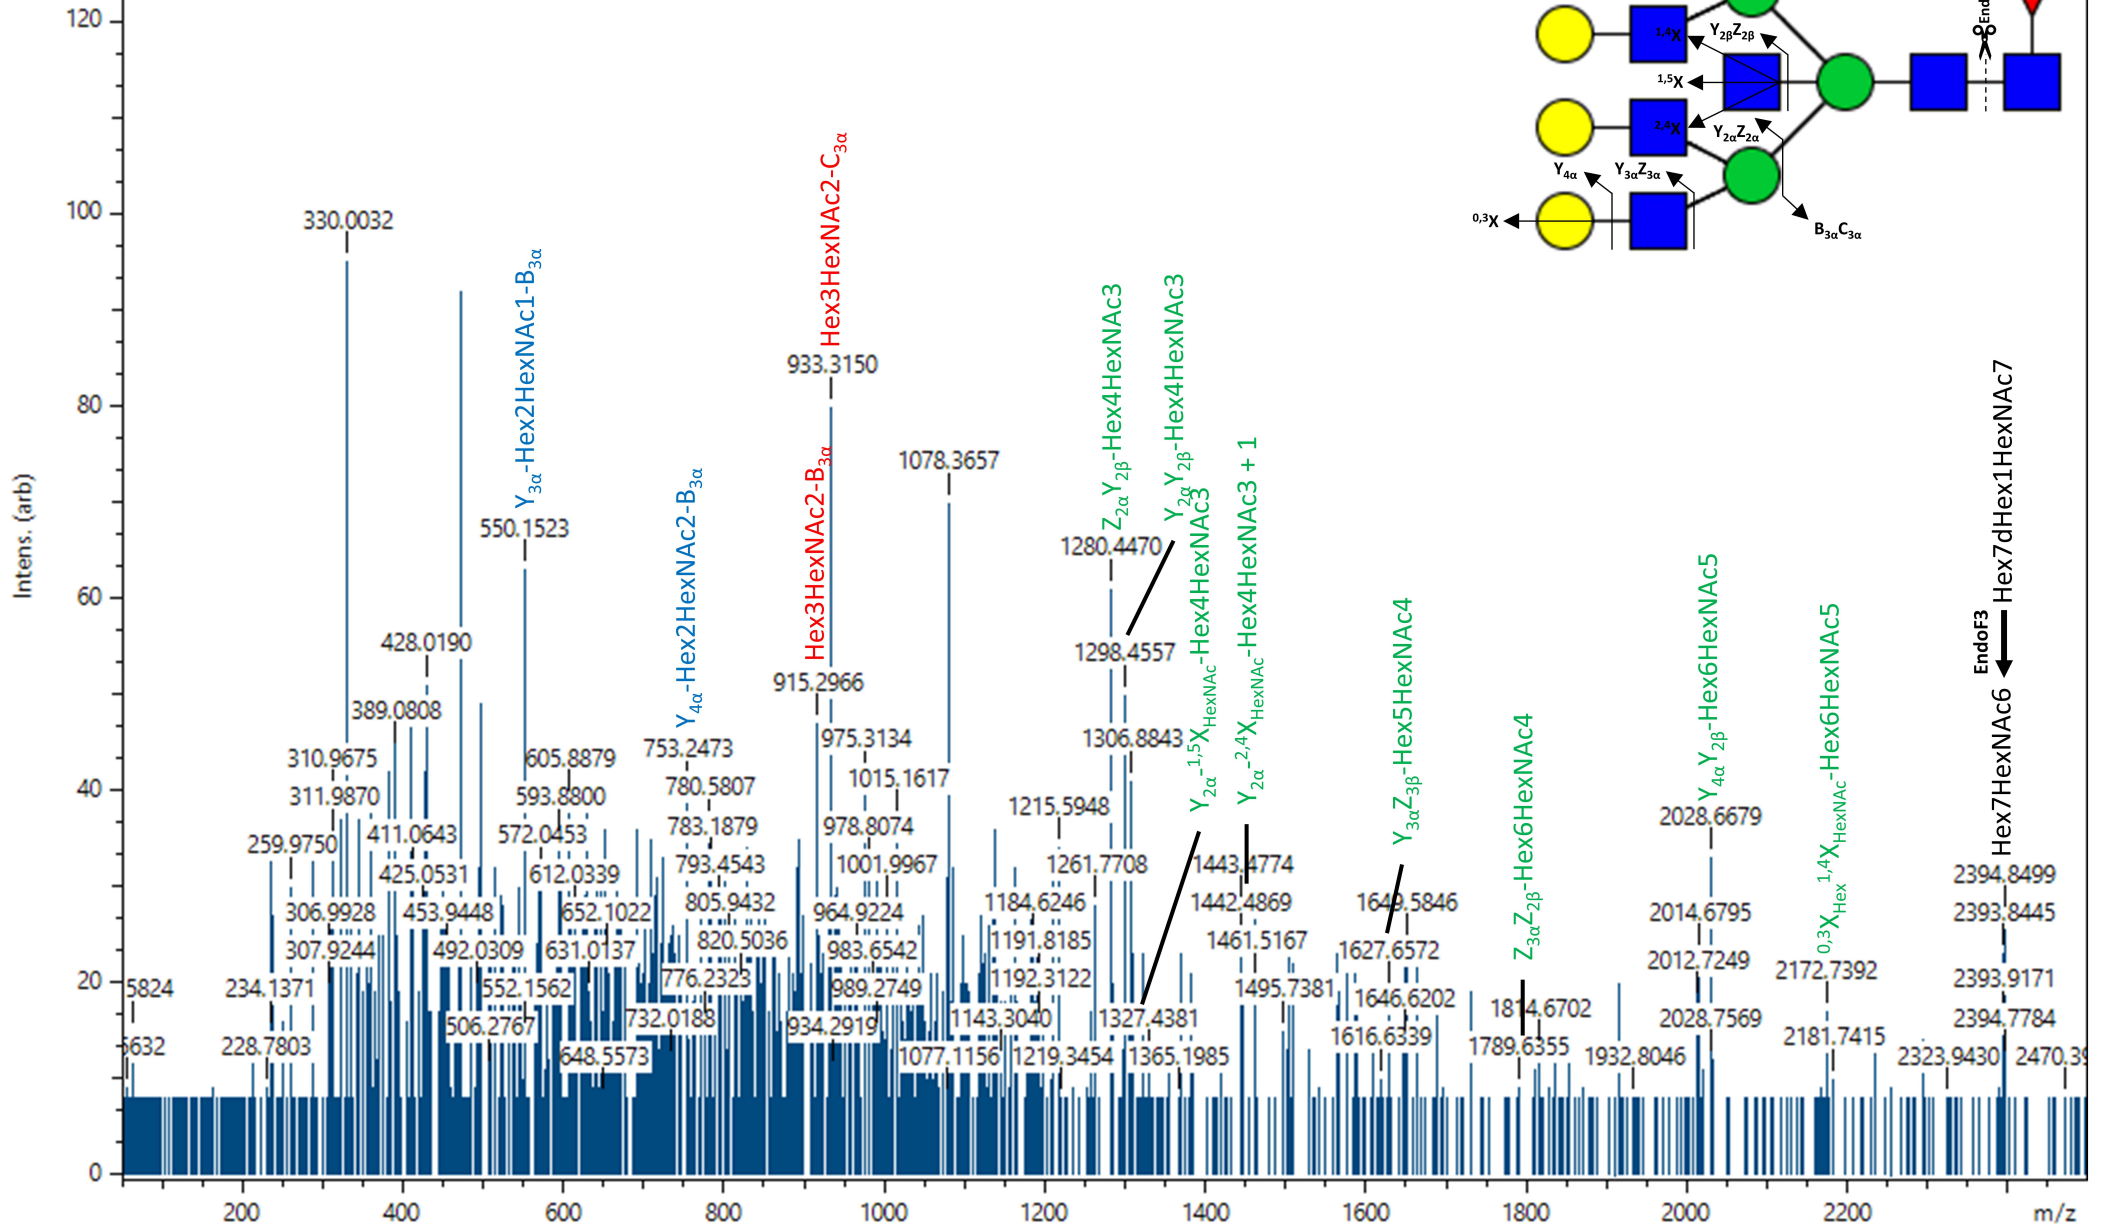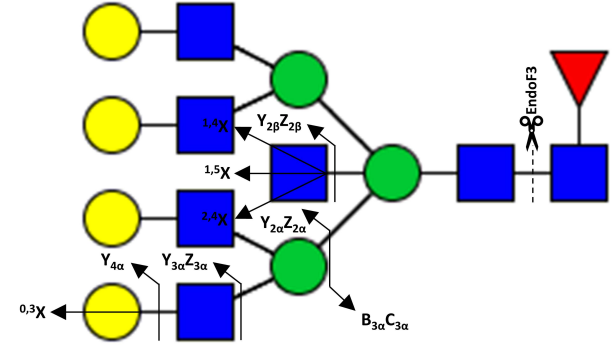

EndoF3 → Hex7HexNAc6 → Hex7dHex1HexNAc7
